# Supplementary material for: Enantioselective hydrophosphinylation of 1-alkenylphosphine oxides catalyzed by chiral strong Brønsted base
Source: Royal Society of Chemistry journal article supplement (doi:10.1039/d0ob01778g), 2020-01-01
Supplement: d0ob01778g1.pdf [file d0ob01778g1.pdf]

## Electronic Supplementary Information

# Enantioselective hydrophosphinylation of 1-alkenylphosphine oxides catalyzed by chiral strong Brønsted base

Azusa Kondoh,\*<sup>a</sup> Sho Ishikawa,<sup>b</sup> and Masahiro Terada\*<sup>b</sup>

<sup>a</sup> Research and Analytical Center for Giant Molecules, Graduate School of Science, Tohoku  
University,  
Sendai 980-8578, Japan

<sup>b</sup> Department of Chemistry, Graduate School of Science Tohoku University, Sendai 980-8578, Japan

### Contents

|                                                       |     |
|-------------------------------------------------------|-----|
| 1. General Information                                | S2  |
| 2. Additional Experimental Results                    | S3  |
| 3. Experimental Procedure and Analytical Data         | S4  |
| 4. References                                         | S17 |
| 5. <sup>1</sup> H NMR and <sup>13</sup> C NMR Spectra | S18 |
| 6. SFC and HPLC Charts                                | S47 |

## 1. General Information

Unless otherwise noted, the reactions were carried out with dried glassware under argon or nitrogen atmosphere.  $^1\text{H}$  NMR spectra were recorded on a JEOL JNM-ECA600 (600 MHz) spectrometer. Chemical shifts are reported in ppm from the solvent resonance or tetramethylsilane (TMS) as the internal standard ( $\text{CDCl}_3$ : 7.26 ppm, TMS: 0.00 ppm). Data are reported as follows: chemical shift, integration, multiplicity (s = singlet, d = doublet, t = triplet, q = quartet, m = multiplet, br = broad) and coupling constants (Hz).  $^{13}\text{C}$  NMR spectra were recorded on a JEOL JNM-ECA600 (150 MHz) spectrometer with complete proton decoupling. Chemical shifts are reported in ppm from the solvent resonance as the internal standard ( $\text{CDCl}_3$ : 77.0 ppm).  $^{31}\text{P}$  NMR spectra were recorded on a JEOL JNM-ECA600 (243 MHz) spectrometer with complete proton decoupling. Chemical shifts are reported in ppm with 85%  $\text{H}_3\text{PO}_4$  solution as an external standard (0.0 ppm in  $\text{CDCl}_3$ ). Analytical thin layer chromatography (TLC) was performed on Merck precoated TLC plates (silica gel 60 GF<sub>254</sub>, 0.25 mm). Flash column chromatography was performed on silica gel 60N (spherical, neutral, 40-50  $\mu\text{m}$ ; Kanto Chemical Co., Inc.). Optical rotations were measured on a Jasco P-1020 digital polarimeter with a sodium lamp and reported as follows;  $[\alpha]_{\text{D}}^{T^\circ\text{C}}$  (c = g/100 mL, solvent). HPLC was performed on JASCO HPLC systems consisting of the following: pump, PU-2080 plus; degasser, DG-2080-53; mixer, MX-2080-32; UV/Vis detector, UV2077 plus; CD detector, CD-2095; Oven, CO-2067 plus. SFC was performed on JASCO SFC systems consisting of the following: HPLC pump, PU-2080 plus;  $\text{CO}_2$  delivery pump, PU-2080- $\text{CO}_2$  plus; solvent selection unit, LV-2080-03; Back Pressure Regulators, BP-2080 and BP-2080 plus; Photodiode detector, MD-2018 plus; Oven, CO-4065. Infrared spectra were recorded on a JASCO FT/IR-4100 spectrometer. High resolution mass spectra analysis was performed on a Bruker Daltonics solariX 9.4T FT-ICR-MS spectrometer and a JEOL JMS-T100GCV Time-of-Flight Mass Spectrometer at Research and Analytical Center for Giant Molecules, Graduate School of Science, Tohoku University.

**Materials:** Unless otherwise noted, materials were purchased from Wako Pure Chemical Industries, Ltd., Tokyo Chemical Industry Co., LTD., Aldrich Inc., and other commercial suppliers and were used without purification. Dichloromethane, tetrahydrofuran, diethyl ether and toluene were supplied from Kanto Chemical Co., Inc. as “Dehydrated solvent system”. Other solvents were purchased from commercial suppliers as dehydrated solvents, and used under argon atmosphere.

## 2. Additional Experimental Results

### Determination of Absolute Configuration of Diphosphine Dioxides **4**

The reaction of **2g** with **3a** under the optimized reaction conditions provided diphosphine dioxide **4ga**, which is the dioxide of prophos, with 67% ee (Scheme S1).

Scheme S1

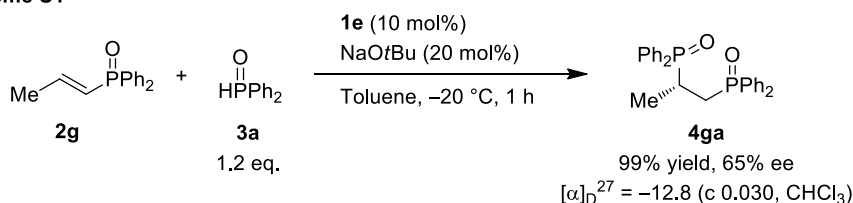

On the other hand, the authentic sample of dioxide of (*R*)-prophos was synthesized by the oxidation of commercially available (*R*)-prophos (Scheme S2).

Scheme S2

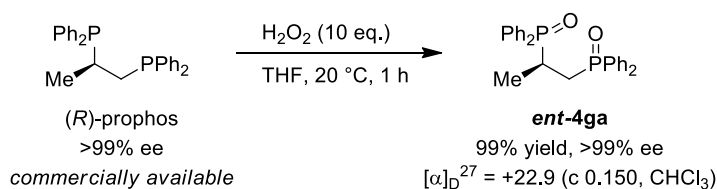

The comparison of the SFC chart and the optical rotation of **4ga** synthesized by our method with those of the authentic sample determined the absolute configuration of **4** as (*S*).

### Transformation of Phosphine-Borane Complex **6ae** to of 1,2-Diphosphinoalkane **5ae**

1,2-Diphosphinoalkane **5ae** is air-sensitive and easily oxidized under air. Although the isolation of **5ae** from a crude mixture obtained by the direct reduction of **4ae** was unsuccessful, **5ae** was isolated in a relatively pure form through the decomplexation of phosphine-borane complex **6ae** with DABCO (Scheme S3). The experimental procedure and the NMR data are provided in the following sections.

Scheme S3

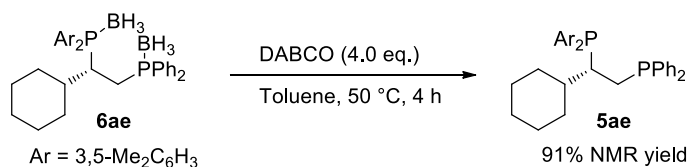

### 3. Experimental Procedure and Analytical Data

#### Preparation of Chiral Urea 1

Chiral ureas **1b-1e** were synthesized according to the procedure reported in our previous work.<sup>1</sup>

#### Urea 1e:

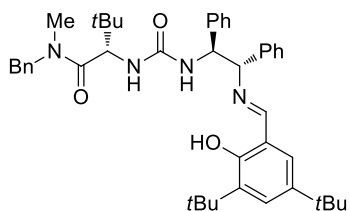

Ratio of rotamers = 76:24

Yellow powder; Optical rotation  $[\alpha]_D^{26} = -22.6$  (c 0.175,  $\text{CHCl}_3$ );  $^1\text{H NMR}$  (600 MHz,  $\text{CDCl}_3$ )  $\delta$  0.76 (s, 2.16H), 0.79 (s, 6.84H), 1.267 (s, 6.84H), 1.269 (s, 2.16H), 1.47 (s, 9H), 2.81 (s, 0.72H), 2.97 (s, 2.28H), 4.32 (d,  $J = 15.0$  Hz, 0.76H), 4.33 (d,  $J = 15.0$  Hz, 0.24H), 4.60 (d,  $J = 5.4$  Hz, 0.24H), 4.61 (d,  $J = 5.4$  Hz, 0.76H), 4.69 (d,  $J = 9.6$  Hz, 0.76H), 4.75 (d,  $J = 14.4$  Hz, 0.76H), 4.82 (d,  $J = 9.6$  Hz, 0.24H), 4.84 (d,  $J = 14.4$  Hz, 0.24H), 5.06 (d,  $J = 6.6$  Hz, 0.24H), 5.09 (d,  $J = 6.6$  Hz, 0.76H), 5.15 (d,  $J = 9.6$  Hz, 0.24H), 5.18 (d,  $J = 9.6$  Hz, 0.76H), 5.23 (br, 0.24H), 5.26 (br, 0.76H), 6.95 (d,  $J = 8.4$  Hz, 0.76H), 6.96 (d,  $J = 8.4$  Hz, 0.24H), 7.10-7.31 (m, 15H), 7.393 (d,  $J = 2.4$  Hz, 0.76H), 7.395 (d,  $J = 2.4$  Hz, 0.24H), 8.20 (s, 0.76H), 8.23 (s, 0.24H);  $^{13}\text{C NMR}$  (150 MHz,  $\text{CDCl}_3$ )  $\delta$  26.4, 26.44, 29.5, 31.4, 33.5, 34.1, 35.1, 35.67, 35.69, 35.9, 51.1, 54.3, 55.3, 60.4, 78.11, 78.15, 117.7, 126.4, 127.37, 127.43, 127.5, 127.56, 127.64, 127.7, 127.8, 128.0, 128.2, 128.3, 128.6, 128.7, 136.1, 136.7, 136.8, 139.47, 139.50, 140.2, 156.6, 156.9, 157.9, 167.9, 172.7, 172.9; IR (ATR): 3371, 3062, 3030, 3002, 2957, 2870, 1679, 1626, 1591, 1539, 1495, 1478, 1454, 1441, 1414, 1393, 1362, 1273, 1250, 1214, 1173, 1090, 1029, 755, 699  $\text{cm}^{-1}$ ; HRMS (ESI) Calcd for  $\text{C}_{44}\text{H}_{56}\text{N}_4\text{O}_3$   $[\text{M}+\text{Na}]^+$  711.4245, Found 711.4244; mp. 142.0-145.0  $^\circ\text{C}$ .

#### Preparation of 1-Alkenylphosphine Oxides 2

##### Method A

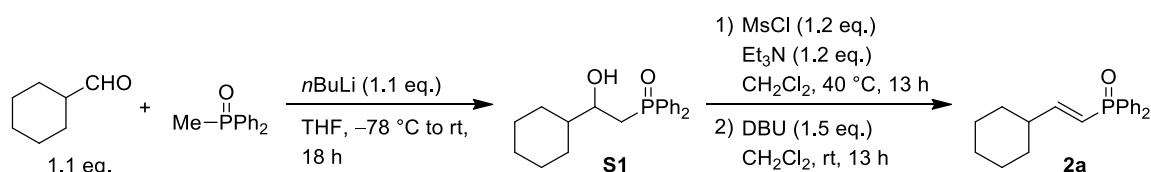

Synthesis of **2a** is representative.

##### Synthesis of S1

To a solution of methyl(diphenyl)phosphine oxide (1.1 g, 5.0 mmol) in THF (20 mL) was added *n*BuLi (1.6 M in hexane, 3.8 mL, 6.0 mmol) dropwise at  $-78$   $^\circ\text{C}$ . After stirring for 15 min, cyclohexanecarboxaldehyde (0.70 mL, 5.5 mmol) was added dropwise to the mixture at the same temperature. The resulting mixture was then warmed up to room temperature and stirred for 18 h. The reaction was quenched with sat. aq.  $\text{NH}_4\text{Cl}$ , and the product was extracted with AcOEt. The combined organic layer was washed with brine, dried over  $\text{Na}_2\text{SO}_4$  and concentrated under reduced pressure. The residue was purified by reprecipitation from  $\text{CH}_2\text{Cl}_2$  and hexane to afford **S1** (1.1 g, 3.4 mmol, 67%) as a white powder.



## Method C<sup>2</sup>

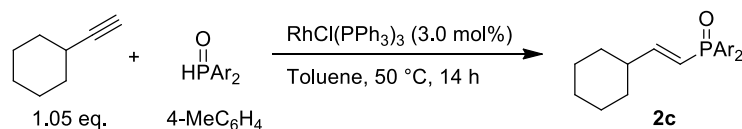

Synthesis of **2c** is representative.

To a solution of di(*para*-tolyl)phosphine oxide (0.16 g, 0.70 mmol) and cyclohexyl acetylene (96  $\mu$ L, 0.74 mmol) in toluene (1.8 mL) was added RhCl(PPh<sub>3</sub>)<sub>3</sub> (19 mg, 0.021 mmol) at room temperature. The mixture was heated at 50 °C for 14 h. After cooled to room temperature, the resulting solution was concentrated under reduced pressure. The residue was purified by silica gel column chromatography (CH<sub>2</sub>Cl<sub>2</sub>/MeOH = 50:1) followed by reprecipitation from CH<sub>2</sub>Cl<sub>2</sub> and hexane to afford **2c** (0.16 g, 0.49 mmol, 69% yield) as a white powder.

### (*E*)-2-Cyclohexyl-1-(diphenylphosphoryl)ethene (**2a**):

42% yield (Method A, over 3 steps); White powder; <sup>1</sup>H NMR (600 MHz, CDCl<sub>3</sub>)  $\delta$  1.12-1.22 (m, 3H), 1.24-1.34 (m, 2H), 1.64-1.70 (m, 1H), 1.73-1.79 (m, 2H), 1.79-1.85 (m, 2H), 2.17-2.26 (m, 1H), 6.16 (ddd,  $J = 24.6, 17.4, 1.2$  Hz, 1H), 6.71 (ddd,  $J = 19.8, 17.4, 6.6$  Hz, 1H), 7.41-7.48 (m, 4H), 7.51 (ddd,  $J = 7.8, 7.2, 1.2$  Hz, 2H), 7.69 (ddd,  $J = 12.0, 8.4, 1.2$  Hz, 4H); <sup>13</sup>C NMR (150 MHz, CDCl<sub>3</sub>)  $\delta$  25.7, 25.9, 31.6, 42.3 (d,  $J = 15.8$  Hz), 119.0 (d,  $J = 103.4$  Hz), 128.4 (d,  $J = 12.9$  Hz), 131.3 (d,  $J = 8.7$  Hz), 131.6 (d,  $J = 2.9$  Hz), 133.4 (d,  $J = 103.4$  Hz), 157.6; <sup>31</sup>P NMR (243 MHz, CDCl<sub>3</sub>)  $\delta$  24.4; IR (ATR): 3429, 3073, 3054, 2925, 2850, 1617, 1438, 1219, 1183, 1120, 1109, 1071, 1003, 818, 772, 749, 719, 700 cm<sup>-1</sup>; HRMS (ESI) Calcd for C<sub>20</sub>H<sub>23</sub>OP [M+Na]<sup>+</sup> 333.1379, Found 333.1378; mp. 129.0-131.0 °C.

### (*E*)-1-Bis(4-(trifluoromethyl)phenyl)phosphoryl-2-cyclohexylethene (**2b**):

59% yield (Method C); Yellow powder; <sup>1</sup>H NMR (600 MHz, CDCl<sub>3</sub>)  $\delta$  1.13-1.24 (m, 3H), 1.26-1.36 (m, 2H), 1.66-1.73 (m, 1H), 1.74-1.80 (m, 2H), 1.80-1.86 (m, 2H), 2.20-2.30 (m, 1H), 6.17 (ddd,  $J = 26.4, 16.8, 1.8$  Hz, 1H), 6.82 (ddd,  $J = 20.4, 16.8, 6.6$  Hz, 1H), 7.74 (dd,  $J = 8.4, 2.4$  Hz, 4H), 7.82 (dd,  $J = 11.4, 8.4$  Hz, 4H); <sup>13</sup>C NMR (150 MHz, CDCl<sub>3</sub>)  $\delta$  25.6, 25.8, 31.5, 42.5 (d,  $J = 15.8$  Hz), 117.3 (d,  $J = 104.9$  Hz), 123.5 (q,  $J = 271.5$  Hz), 125.6 (dq,  $J = 11.4, 4.4$  Hz), 131.7 (d,  $J = 10.1$  Hz), 133.8 (q,  $J = 33.0$  Hz), 137.2 (d,  $J = 102.0$  Hz), 159.9; <sup>31</sup>P NMR (243 MHz, CDCl<sub>3</sub>)  $\delta$  22.1; IR (ATR): 3420, 3043, 2993, 2927, 2903, 2853, 1611, 1450, 1399, 1324, 1189, 1167, 1130, 1102, 1063, 1018, 997, 836, 818, 771, 710, 700 cm<sup>-1</sup>; HRMS (ESI) Calcd for C<sub>22</sub>H<sub>21</sub>F<sub>6</sub>OP [M+Na]<sup>+</sup> 469.1126, Found 469.1126; mp. 189.0-191.0 °C.

### (*E*)-2-Cyclohexyl-1-(di-*para*-tolylphosphoryl)ethene (**2c**):

69% yield (Method C); White powder; <sup>1</sup>H NMR (600 MHz, CDCl<sub>3</sub>)  $\delta$  1.11-1.21 (m, 3H), 1.24-1.33 (m, 2H), 1.64-1.70 (m, 1H), 1.72-1.78 (m, 2H), 1.78-1.83 (m, 2H), 2.15-2.23 (m, 1H), 2.39 (s, 6H), 6.13 (ddd,  $J = 24.6, 16.8, 1.8$  Hz, 1H), 6.66 (ddd,  $J = 19.8, 16.8, 6.0$  Hz, 1H), 7.25 (dd,  $J = 7.8, 2.4$  Hz, 4H), 7.55 (dd,  $J = 12.0, 7.8$  Hz, 4H); <sup>13</sup>C NMR (150 MHz, CDCl<sub>3</sub>)  $\delta$  21.6, 25.8, 25.9, 31.7, 42.3 (d,  $J = 14.4$  Hz), 119.4 (d,  $J = 103.4$  Hz), 129.2 (d,  $J = 11.4$  Hz), 130.2 (d,  $J = 106.4$  Hz), 131.3 (d,  $J = 10.1$  Hz), 141.9 (d,  $J = 3.0$  Hz), 157.0; <sup>31</sup>P NMR (243 MHz, CDCl<sub>3</sub>)  $\delta$  24.8; IR

(ATR): 3385, 3053, 3034, 3020, 2983, 2923, 2898, 2849, 1641, 1626, 1603, 1501, 1447, 1398, 1179, 1117, 1110, 1009, 811, 714, 654, 630  $\text{cm}^{-1}$ ; HRMS (ESI) Calcd for  $\text{C}_{22}\text{H}_{27}\text{OP}$   $[\text{M}+\text{Na}]^+$  361.1692, Found 361.1691; mp. 154.0-155.0  $^{\circ}\text{C}$ .

**(E)-1-Bis(3,5-dimethylphenyl)phosphoryl-2-cyclohexylethene (2d):**

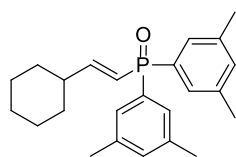

46% yield (Method C); Yellow-brown powder;  $^1\text{H}$  NMR (600 MHz,  $\text{CDCl}_3$ )  $\delta$  1.13-1.23 (m, 3H), 1.24-1.34 (m, 2H), 1.62-1.70 (m, 1H), 1.72-1.79 (m, 2H), 1.79-1.85 (m, 2H), 2.17-2.25 (m, 1H), 2.33 (s, 12H), 6.14 (ddd,  $J = 24.6, 16.8, 1.2$  Hz, 1H), 6.70 (ddd,  $J = 19.2, 16.8, 6.0$  Hz, 1H), 7.12 (s, 2H), 7.29 (d,  $J = 12.6$  Hz, 4H);  $^{13}\text{C}$  NMR (150 MHz,  $\text{CDCl}_3$ )  $\delta$  21.2, 25.7, 25.9, 31.7, 42.3 (d,  $J = 15.9$  Hz), 119.3 (d,  $J = 101.9$  Hz), 128.8 (d,  $J = 10.1$  Hz), 133.2 (d,  $J = 2.9$  Hz), 133.3 (d,  $J = 102.0$  Hz), 138.0 (d,  $J = 12.9$  Hz), 156.9;  $^{31}\text{P}$  NMR (243 MHz,  $\text{CDCl}_3$ )  $\delta$  24.5; IR (ATR): 3440, 3031, 2997, 2923, 2851, 1630, 1601, 1448, 1418, 1274, 1182, 1128, 991, 872, 851, 810, 692  $\text{cm}^{-1}$ ; HRMS (ESI) Calcd for  $\text{C}_{24}\text{H}_{31}\text{OP}$   $[\text{M}+\text{Na}]^+$  389.2005, Found 389.2004; mp. 151.0-153.0  $^{\circ}\text{C}$ .

**(E)-2-Cyclopentyl-1-(diphenylphosphoryl)ethane (2e):**

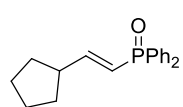

60% yield (Method C); White powder;  $^1\text{H}$  NMR (600 MHz,  $\text{CDCl}_3$ )  $\delta$  1.39-1.48 (m, 2H), 1.56-1.73 (m, 4H), 1.82-1.90 (m, 2H), 2.65-2.74 (m, 1H), 6.18 (ddd,  $J = 24.6, 16.8, 1.2$  Hz, 1H), 6.74 (ddd,  $J = 19.8, 16.8, 7.8$  Hz, 1H), 7.42-7.48 (m, 4H), 7.49-7.54 (m, 2H), 7.70 (ddd,  $J = 12.0, 7.8, 1.2$  Hz, 4H);  $^{13}\text{C}$  NMR (150 MHz,  $\text{CDCl}_3$ )  $\delta$  25.2, 32.2, 44.9 (d,  $J = 15.8$  Hz), 119.4 (d,  $J = 103.4$  Hz), 128.4 (d,  $J = 11.6$  Hz), 131.3 (d,  $J = 10.1$  Hz), 131.6 (d,  $J = 2.9$  Hz), 133.4 (d,  $J = 103.4$  Hz), 156.8;  $^{31}\text{P}$  NMR (243 MHz,  $\text{CDCl}_3$ )  $\delta$  24.1; IR (ATR): 3457, 3075, 3052, 3008, 2963, 2915, 2865, 1632, 1604, 1485, 1439, 1178, 1118, 1104, 1073, 1007, 809, 772, 752, 714, 700  $\text{cm}^{-1}$ ; HRMS (ESI) Calcd for  $\text{C}_{19}\text{H}_{21}\text{OP}$   $[\text{M}+\text{Na}]^+$  319.1222, Found 319.1222; mp. 112.0-114.0  $^{\circ}\text{C}$ .

**(E)-2-Cyclopropyl-1-(diphenylphosphoryl)ethene (2f):**

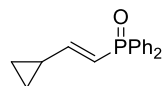

50% yield (Method C); White powder;  $^1\text{H}$  NMR (600 MHz,  $\text{CDCl}_3$ )  $\delta$  0.60-0.69 (m, 2H), 0.88-0.97 (m, 2H), 1.64-1.71 (m, 1H), 6.18 (ddd,  $J = 19.2, 16.8, 7.8$  Hz, 1H), 6.26 (dd,  $J = 24.0, 16.8$  Hz, 1H), 7.42-7.48 (m, 4H), 7.48-7.53 (m, 2H), 7.70 (ddd,  $J = 12.0, 8.4, 1.2$  Hz, 4H);  $^{13}\text{C}$  NMR (150 MHz,  $\text{CDCl}_3$ )  $\delta$  8.5, 16.4 (d,  $J = 21.6$  Hz), 117.7 (d,  $J = 104.9$  Hz), 128.4 (d,  $J = 12.9$  Hz), 131.2 (d,  $J = 10.1$  Hz), 131.5 (d,  $J = 2.9$  Hz), 133.6 (d,  $J = 104.9$  Hz), 156.6 (d,  $J = 2.9$  Hz);  $^{31}\text{P}$  NMR (243 MHz,  $\text{CDCl}_3$ )  $\delta$  23.7; IR (ATR): 3432, 3074, 3057, 3007, 2972, 2936, 2874, 1621, 1438, 1182, 1120, 1104, 998, 955, 794, 771, 752, 720, 697  $\text{cm}^{-1}$ ; HRMS (ESI) Calcd for  $\text{C}_{17}\text{H}_{17}\text{OP}$   $[\text{M}+\text{Na}]^+$  291.0909, Found 291.0909; mp. 131.0-133.0  $^{\circ}\text{C}$ .

**(E)-1-(Diphenylphosphoryl)prop-1-ene (2g):**

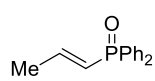

42% yield (Method A, over 3 steps); White powder;  $^1\text{H}$  NMR (600 MHz,  $\text{CDCl}_3$ )  $\delta$  1.99 (ddd,  $J = 6.6, 2.4, 1.8$  Hz, 3H), 6.27 (ddq,  $J = 24.0, 16.8, 1.8$  Hz, 1H), 6.71 (ddq,  $J = 19.2, 16.8, 6.6$  Hz, 1H), 7.43-7.49 (m, 4H), 7.49-7.54 (m, 2H), 7.70 (ddd,  $J = 12.0, 8.4, 1.8$  Hz, 4H);  $^{13}\text{C}$  NMR (150 MHz,  $\text{CDCl}_3$ )  $\delta$  20.4 (d,  $J = 18.6$  Hz), 123.5 (d,  $J = 103.5$  Hz), 128.5 (d,  $J = 11.6$  Hz), 131.3 (d,  $J = 10.1$  Hz), 131.6 (d,  $J = 2.9$  Hz), 133.2 (d,  $J = 104.9$  Hz), 147.9 (d,  $J = 2.9$  Hz);  $^{31}\text{P}$  NMR (243 MHz,  $\text{CDCl}_3$ )  $\delta$  23.8; IR (ATR): 3403, 3058, 2993, 2966, 2940, 1631, 1591, 1560, 1485, 1439, 1220, 1181, 1120, 1106, 1071, 1027, 996, 791, 773, 751, 718, 698  $\text{cm}^{-1}$ ; HRMS

(ESI) Calcd for C<sub>15</sub>H<sub>15</sub>OP [M+Na]<sup>+</sup> 265.0753, Found 265.0752; mp. 128.0-130.0 °C.

**(E)-1-(Diphenylphosphoryl)hex-1-ene (2h):**

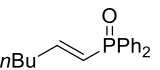 78% yield (Method C); White powder; <sup>1</sup>H NMR (600 MHz, CDCl<sub>3</sub>) δ 0.91 (t, *J* = 7.2 Hz, 3H), 1.35 (qt, *J* = 7.2, 7.2 Hz, 2H), 1.47 (tt, *J* = 7.8, 7.2 Hz, 2H), 2.27-2.34 (m, 2H), 6.23 (ddt, *J* = 24.6, 16.8, 1.8 Hz, 1H), 6.73 (ddt, *J* = 19.8, 16.8, 6.6 Hz, 1H), 7.41-7.49 (m, 4H), 7.49-7.54 (m, 2H), 7.69 (ddd, *J* = 12.0, 8.4, 1.8 Hz, 4H); <sup>13</sup>C NMR (150 MHz, CDCl<sub>3</sub>) δ 13.7, 22.1, 29.9, 34.1 (d, *J* = 17.3 Hz), 121.6 (d, *J* = 102.0 Hz), 128.4 (d, *J* = 11.6 Hz), 131.2 (d, *J* = 8.6 Hz), 131.5 (d, *J* = 2.9 Hz), 133.2 (d, *J* = 104.9 Hz), 152.8; <sup>31</sup>P NMR (243 MHz, CDCl<sub>3</sub>) δ 24.0; IR (ATR): 3439, 3055, 2957, 2928, 2871, 1630, 1591, 1484, 1465, 1437, 1379, 1308, 1183, 1119, 1105, 1070, 1028, 998, 930, 815, 746, 719, 695 cm<sup>-1</sup>; HRMS (ESI) Calcd for C<sub>18</sub>H<sub>21</sub>OP [M+Na]<sup>+</sup> 307.1222, Found 307.1222; mp. 73.0-75.0 °C.

**(E)-1-(Diphenylphosphoryl)-3-phenylprop-1-ene (2i):**

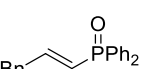 53% yield (Method C); White powder; <sup>1</sup>H NMR (600 MHz, CDCl<sub>3</sub>) δ 3.62 (ddd, *J* = 6.0, 2.4, 1.8 Hz, 2H), 6.21 (ddt, *J* = 24.0, 16.8, 1.8 Hz, 1H), 6.88 (ddt, *J* = 18.6, 16.8, 6.0 Hz, 1H), 7.18 (d, *J* = 7.2 Hz, 2H), 7.24 (t, *J* = 7.2 Hz, 1H), 7.31 (dd, *J* = 7.2, 7.2 Hz, 2H), 7.45 (ddd, *J* = 7.8, 7.2, 3.0 Hz, 4H), 7.52 (td, *J* = 7.2, 1.2 Hz, 2H), 7.67 (ddd, *J* = 12.0, 7.8, 1.2 Hz, 4H); <sup>13</sup>C NMR (150 MHz, CDCl<sub>3</sub>) δ 40.6 (d, *J* = 17.1 Hz), 123.3 (d, *J* = 102.0 Hz), 126.7, 128.5 (d, *J* = 11.6 Hz), 128.7, 128.9, 131.3 (d, *J* = 8.7 Hz), 131.7, 133.0 (d, *J* = 104.9 Hz), 137.5, 150.7 (d, *J* = 2.9 Hz); <sup>31</sup>P NMR (243 MHz, CDCl<sub>3</sub>) δ 24.0; IR (ATR): 3410, 3055, 3025, 2993, 2967, 2937, 1632, 1618, 1601, 1495, 1485, 1454, 1439, 1180, 1120, 1108, 1072, 1001, 852, 776, 745, 720, 696 cm<sup>-1</sup>; HRMS (ESI) Calcd for C<sub>20</sub>H<sub>19</sub>OP [M+Na]<sup>+</sup> 341.1066, Found 341.1065; mp. 125.0-127.0 °C.

**(E)-1-(Diphenylphosphoryl)-6-(methoxymethyl)oxyhex-1-ene (2j):**

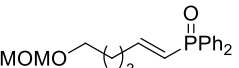 46% yield (Method C); White powder; <sup>1</sup>H NMR (600 MHz, CDCl<sub>3</sub>) δ 1.55-1.67 (m, 4H), 2.31-2.38 (m, 2H), 3.34 (s, 3H), 3.53 (t, *J* = 6.6 Hz, 2H), 4.60 (s, 2H), 6.25 (ddt, *J* = 24.6, 16.8, 1.2 Hz, 1H), 6.74 (ddt, *J* = 19.2, 16.8, 6.6 Hz, 1H), 7.42-7.49 (m, 4H), 7.49-7.55 (m, 2H), 7.69 (ddd, *J* = 11.4, 8.4, 1.2 Hz, 4H); <sup>13</sup>C NMR (150 MHz, CDCl<sub>3</sub>) δ 24.6, 29.2, 34.1 (d, *J* = 15.8 Hz), 55.1, 67.2, 96.3, 122.0 (d, *J* = 102.0 Hz), 128.4 (d, *J* = 11.4 Hz), 131.2 (d, *J* = 10.1 Hz), 131.6 (d, *J* = 2.9 Hz), 133.2 (d, *J* = 104.9 Hz), 152.2; <sup>31</sup>P NMR (243 MHz, CDCl<sub>3</sub>) δ 23.9; IR (ATR): 3435, 3056, 2990, 2937, 2877, 2832, 1631, 1438, 1187, 1146, 1119, 1107, 1071, 1041, 998, 917, 809, 748, 720, 698 cm<sup>-1</sup>; HRMS (ESI) Calcd for C<sub>20</sub>H<sub>25</sub>O<sub>3</sub>P [M+Na]<sup>+</sup> 367.1434, Found 367.1433; mp. 59.0-61.0 °C.

**(E)-1-(Diphenylphosphoryl)-3,3-dimethylbut-1-ene (2k):**

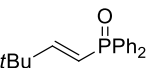 69% yield (Method B); White powder; <sup>1</sup>H NMR (600 MHz, CDCl<sub>3</sub>) δ 1.11 (s, 9H), 6.11 (dd, *J* = 24.0, 16.8 Hz, 1H), 6.77 (dd, *J* = 19.8, 16.8 Hz, 1H), 7.44-7.49 (m, 4H), 7.50-7.55 (m, 2H), 7.68 (ddd, *J* = 12.0, 8.4, 1.2 Hz, 4H); <sup>13</sup>C NMR (150 MHz, CDCl<sub>3</sub>) δ 28.6, 35.2 (d, *J* = 15.9 Hz), 116.3 (d, *J* = 103.5 Hz), 128.5 (d, *J* = 11.4 Hz), 131.2 (d, *J* = 10.1 Hz), 133.3 (d, *J* = 104.9 Hz), 162.3; <sup>31</sup>P NMR (243 MHz, CDCl<sub>3</sub>) δ 24.1; IR (ATR): 3341, 3054, 3018, 2964, 2929, 2900, 2867, 1644, 1605, 1486, 1439, 1270, 1245, 1180, 1119, 1105, 1073, 1033, 1006, 828, 820, 745, 721, 711, 695 cm<sup>-1</sup>; HRMS (ESI) Calcd for C<sub>18</sub>H<sub>21</sub>OP [M+Na]<sup>+</sup> 307.1222, Found 307.1222; mp. 163.0-165.0 °C.



## Preparation of Diarylphosphine Oxides **3**<sup>3</sup>

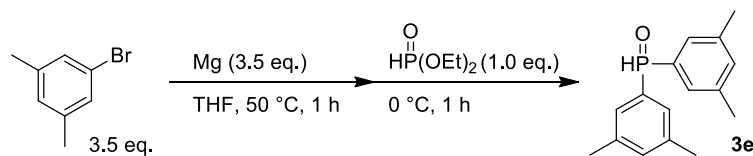

Synthesis of **3e** is representative.

To a mixture of magnesium (0.43 g, 17.5 mmol) and THF (10 mL) was added a solution of 1-bromo-3,5-dimethylbenzene (2.4 mL, 17.5 mmol) in THF (10 mL) dropwise with a dropping funnel at 50 °C and the resulting mixture was stirred for 1 h. After cooled to 0 °C, a solution of diethyl phosphite (0.65 mL, 5.0 mmol) in THF (10 mL) was added dropwise with a dropping funnel at 0 °C. After stirring at 0 °C for 1 h, the reaction was quenched with sat. aq. NH<sub>4</sub>Cl, and the product was extracted with AcOEt. The combined organic layer was washed with brine, dried over Na<sub>2</sub>SO<sub>4</sub> and concentrated under reduced pressure. The residue was purified by silica gel column chromatography (hexane/AcOEt = 1:1) followed by recrystallization from a hexane/AcOEt mixture to afford **3e** (0.82 g, 3.2 mmol, 64%) as a white powder.

## General Procedure for Hydrophosphinylation of 1-Alkenylphosphine Oxides Catalyzed By a Chiral Ureate

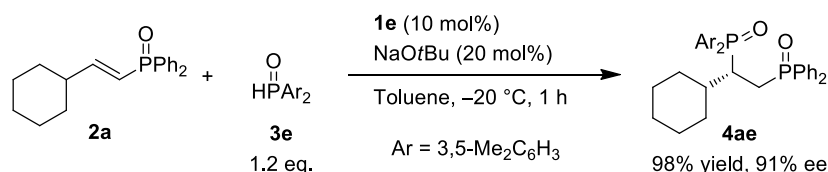

The reaction of **2a** with **3e** is representative (Scheme 2).

To a solution of urea **1e** (6.9 mg, 0.010 mmol) in toluene (1.0 mL) was added a solution of NaOtBu in THF (2.0 M, 10 μL, 0.020 mmol) at room temperature. The mixture was cooled to -20 °C and stirred for 10 min. Then, diarylphosphine oxide **3e** (31 mg, 0.12 mmol) was added at -20 °C. After stirring for 5 min, (*E*)-1-alkenyl(diphenyl)phosphine oxide **2a** (31 mg, 0.10 mmol) was added at -20 °C, and the reaction mixture was stirred for 1 h. The reaction was quenched with sat. aq. NH<sub>4</sub>Cl, and the product was extracted with AcOEt. The combined organic layer was washed with brine, dried over Na<sub>2</sub>SO<sub>4</sub> and concentrated under reduced pressure. The residue was purified by silica gel column chromatography (CH<sub>2</sub>Cl<sub>2</sub>/MeOH = 50:1) to afford **4ae** (56 mg, 0.098 mmol, 98% yield, 91% ee) as a white powder. Recrystallization from a mixture of hexane and methanol improved the enantiomeric purity of **4ae** (> 99% ee, 24 mg from 32 mg of **4ae** with 91% ee).

### (*S*)-1-Cyclohexyl-1,2-bis(diphenylphosphoryl)ethane (**4aa**):

43 mg, 84% yield; White powder; SFC analysis DAICEL Chiralpak ID-3/SFC 4.6×150 mm (CO<sub>2</sub>/MeOH = 80/20, 3.0 mL/min, 220 nm, 40 °C) 5.4 (minor), 7.1 (major) min; 76% ee; Optical rotation [α]<sub>D</sub><sup>28</sup> = +7.6 (c 0.165, CHCl<sub>3</sub>); <sup>1</sup>H NMR (600 MHz, CDCl<sub>3</sub>) δ 0.71-0.96 (m, 4H), 1.31-1.43 (m, 2H), 1.44-1.54 (m, 2H), 1.54-1.60 (m, 1H), 1.62-1.77 (m, 2H), 2.55-2.73 (m, 2H), 2.98-3.07 (m, 1H), 7.29 (ddd, *J* = 7.8, 7.2, 3.0 Hz, 2H), 7.33-7.40 (m, 4H), 7.40-7.45 (m, 4H), 7.45-7.53 (m, 4H), 7.72 (ddd, *J* = 11.4, 8.4, 1.2 Hz, 2H), 7.76-7.83 (m, 4H); <sup>13</sup>C NMR (150 MHz, CDCl<sub>3</sub>) δ 24.9 (d, *J* = 68.9 Hz), 25.8, 26.7, 26.8, 30.7,

31.8 (d,  $J = 11.6$  Hz), 36.7 (dd,  $J = 68.9, 4.4$  Hz), 38.3, 128.47 (d,  $J = 11.4$  Hz), 128.49 (d,  $J = 11.4$  Hz), 128.60 (d,  $J = 11.6$  Hz), 128.64 (d,  $J = 10.1$  Hz), 130.6 (d,  $J = 10.1$  Hz), 130.7 (d,  $J = 8.6$  Hz), 130.9 (d,  $J = 8.6$  Hz), 131.1 (d,  $J = 8.6$  Hz), 131.4 (2C), 131.5 (d,  $J = 2.9$  Hz), 131.7 (d,  $J = 3.0$  Hz), 132.7 (d,  $J = 93.5$  Hz), 133.0 (d,  $J = 93.3$  Hz), 133.3 (d,  $J = 97.7$  Hz), 133.7 (d,  $J = 97.7$  Hz);  $^{31}\text{P}$  NMR (243 MHz,  $\text{CDCl}_3$ )  $\delta$  30.4 (d,  $J = 42.8$  Hz), 37.4 (d,  $J = 42.8$  Hz); IR (ATR): 3425, 3095, 3054, 3024, 2987, 2925, 2850, 1591, 1486, 1438, 1410, 1343, 1182, 1117, 1100, 1071, 999, 818, 750, 718, 697, 662, 612  $\text{cm}^{-1}$ ; HRMS (ESI) Calcd for  $\text{C}_{32}\text{H}_{34}\text{O}_2\text{P}_2$   $[\text{M}+\text{Na}]^+$  535.1926, Found 535.1926; mp. 246.0-248.0  $^\circ\text{C}$ .

**(S)-1-Cyclohexyl-2-(diphenylphosphoryl)-1-(di-*para*-tolyl)phosphorylethane (4ab):**

47 mg, 86% yield; White powder; SFC analysis DAICEL Chiralpak ID-3/SFC 4.6×150 mm ( $\text{CO}_2/\text{MeOH} = 80/20$ , 3.0 mL/min, 220 nm, 40  $^\circ\text{C}$ ) 6.2 (minor), 9.3 (major) min; 55% ee; Optical rotation  $[\alpha]_{\text{D}}^{28} = +4.9$  (c 0.170,  $\text{CHCl}_3$ );  $^1\text{H}$  NMR (600 MHz,  $\text{CDCl}_3$ )  $\delta$  0.77-0.99 (m, 4H), 1.29-1.43 (m, 2H), 1.47-1.54 (m, 2H), 1.54-1.60 (m, 1H), 1.66-1.77 (m, 2H), 2.32 (s, 3H), 2.36 (s, 3H), 2.59-2.69 (m, 2H), 2.93-3.02 (m, 1H), 7.13 (dd,  $J = 7.8, 1.8$  Hz, 2H), 7.22 (dd,  $J = 7.8, 1.8$  Hz, 2H), 7.28 (ddd,  $J = 7.8, 7.8, 3.0$  Hz, 2H), 7.36 (ddd,  $J = 11.4, 8.4, 1.2$  Hz, 2H), 7.42 (ddd,  $J = 7.8, 7.2, 1.2$  Hz, 1H), 7.43-7.47 (m, 2H), 7.48-7.52 (m, 1H), 7.63 (dd,  $J = 10.2, 7.8$  Hz, 2H), 7.66 (dd,  $J = 10.8, 7.8$  Hz, 2H), 7.71 (ddd,  $J = 11.4, 8.4, 1.2$  Hz, 2H);  $^{13}\text{C}$  NMR (150 MHz,  $\text{CDCl}_3$ )  $\delta$  21.46, 21.50, 24.8 (d,  $J = 69.0$  Hz), 25.8, 26.7, 26.9, 30.6, 31.9 (d,  $J = 10.1$  Hz), 36.8 (dd,  $J = 67.5, 4.2$  Hz), 38.3, 128.4 (d,  $J = 11.4$  Hz), 128.6 (d,  $J = 11.6$  Hz), 129.2 (d,  $J = 12.9$  Hz), 129.3 (d,  $J = 12.9$  Hz), 129.6 (d,  $J = 96.2$  Hz), 129.9 (d,  $J = 97.7$  Hz), 130.64 (d,  $J = 10.1$  Hz), 130.70 (d,  $J = 8.6$  Hz), 130.9 (d,  $J = 8.6$  Hz), 131.0 (d,  $J = 8.6$  Hz), 131.3 (d,  $J = 2.9$  Hz), 131.6 (d,  $J = 2.9$  Hz), 133.4 (d,  $J = 99.2$  Hz), 134.0 (d,  $J = 97.7$  Hz), 141.6 (d,  $J = 2.9$  Hz), 141.8;  $^{31}\text{P}$  NMR (243 MHz,  $\text{CDCl}_3$ )  $\delta$  30.4 (d,  $J = 39.6$  Hz), 37.8 (d,  $J = 39.6$  Hz); IR (ATR): 3426, 3055, 3023, 2966, 2925, 2852, 1602, 1499, 1484, 1450, 1438, 1400, 1374, 1312, 1262, 1178, 1114, 1099, 1070, 1020, 998, 893, 808, 745, 722, 695, 658, 634  $\text{cm}^{-1}$ ; HRMS (ESI) Calcd for  $\text{C}_{34}\text{H}_{38}\text{O}_2\text{P}_2$   $[\text{M}+\text{Na}]^+$  563.2239, Found 563.2239; mp. 235.0-238.0  $^\circ\text{C}$ .

**(S)-1-Cyclohexyl-2-(diphenylphosphoryl)-1-(di-*meta*-tolyl)phosphorylethane (4ad):**

41 mg, 76% yield; White powder; SFC analysis DAICEL Chiralpak ID-3/SFC 4.6×150 mm ( $\text{CO}_2/\text{MeOH} = 80/20$ , 3.0 mL/min, 220 nm, 40  $^\circ\text{C}$ ) 5.0 (minor), 6.6 (major) min; 90% ee; Optical rotation  $[\alpha]_{\text{D}}^{27} = +15.7$  (c 0.130,  $\text{CHCl}_3$ );  $^1\text{H}$  NMR (600 MHz,  $\text{CDCl}_3$ )  $\delta$  0.75-0.97 (m, 4H), 1.22-1.43 (m, 2H), 1.46-1.58 (m, 3H), 1.65-1.77 (m, 2H), 2.32 (s, 3H), 2.36 (s, 3H), 2.58-2.70 (m, 2H), 2.95-3.05 (m, 1H), 7.21 (d,  $J = 7.2$  Hz, 1H), 7.23-7.33 (m, 5H), 7.35 (ddd,  $J = 10.8, 9.0, 1.2$  Hz, 2H), 7.41 (ddd,  $J = 7.8, 7.2, 1.2$  Hz, 1H), 7.43-7.48 (m, 2H), 7.50 (ddd,  $J = 7.8, 7.2, 1.2$  Hz, 1H), 7.52-7.57 (m, 2H), 7.66 (d,  $J = 11.4$  Hz, 2H), 7.71 (ddd,  $J = 11.4, 8.4, 1.8$  Hz, 2H);  $^{13}\text{C}$  NMR (150 MHz,  $\text{CDCl}_3$ )  $\delta$  21.4, 24.8 (d,  $J = 68.9$  Hz), 25.8, 26.7, 26.9, 30.6, 32.0 (d,  $J = 10.1$  Hz), 36.7 (dd,  $J = 67.5, 2.9$  Hz), 38.2, 127.9 (d,  $J = 8.6$  Hz), 128.0 (d,  $J = 8.7$  Hz), 128.3 (d,  $J = 10.1$  Hz), 128.4 (d,  $J = 11.6$  Hz), 128.56 (d,  $J = 11.4$  Hz), 128.59 (d,  $J = 11.4$  Hz), 130.6 (d,  $J = 8.6$  Hz), 130.7 (d,  $J = 8.7$  Hz), 131.4 (d,  $J = 2.9$  Hz), 131.56 (d,  $J = 8.7$  Hz), 131.64 (d,  $J = 2.9$  Hz), 131.7 (d,  $J = 7.2$  Hz), 132.2 (d,  $J = 2.9$  Hz), 132.3 (d,  $J = 2.9$  Hz), 132.7 (d,  $J = 93.5$  Hz), 132.9 (d,  $J = 93.3$  Hz), 133.5 (d,  $J = 97.7$  Hz), 133.9 (d,  $J = 97.7$  Hz), 138.4 (d,  $J = 11.6$  Hz), 138.5 (d,  $J = 11.6$  Hz);  $^{31}\text{P}$  NMR (243 MHz,  $\text{CDCl}_3$ )  $\delta$  30.3 (d,  $J = 42.8$  Hz), 37.9 (d,  $J = 42.8$  Hz); IR (ATR): 3437, 3054, 2926, 2852, 1593, 1483, 1450, 1438, 1408, 1317,

1262, 1182, 1117, 1088, 1068, 998, 870, 819, 788, 745, 733, 721, 699  $\text{cm}^{-1}$ ; HRMS (ESI) Calcd for  $\text{C}_{34}\text{H}_{38}\text{O}_2\text{P}_2$   $[\text{M}+\text{Na}]^+$  563.2239, Found 563.2239; mp. 213.0-216.0  $^\circ\text{C}$ .

**(S)-1-(Bis(3,5-dimethylphenyl)phosphoryl)-1-cyclohexyl-2-(diphenylphosphoryl)ethane (4ae):**

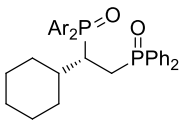  
Ar = 3,5-Me<sub>2</sub>C<sub>6</sub>H<sub>3</sub>

56 mg, 98% yield; White powder; SFC analysis DAICEL Chiralpak ID-3/SFC 4.6×150 mm (CO<sub>2</sub>/MeOH = 80/20, 3.0 mL/min, 220 nm, 40  $^\circ\text{C}$ ) 4.0 (minor), 4.9 (major) min; 91% ee; Optical rotation  $[\alpha]_{\text{D}}^{27} = +12.0$  (c 0.190, CHCl<sub>3</sub>),  $[\alpha]_{\text{D}}^{27} = +10.8$  (c 0.05, CHCl<sub>3</sub>) after enhancement of enantiomeric purity (>99% ee); <sup>1</sup>H NMR (600 MHz, CDCl<sub>3</sub>)  $\delta$  0.75-0.97 (m, 4H), 1.22-1.33 (m, 1H), 1.35-1.43 (m, 1H), 1.46-1.80 (m, 5H), 2.28 (s, 6H), 2.32 (s, 6H), 2.58-2.72 (m, 2H), 2.96-3.05 (m, 1H), 7.00 (s, 1H), 7.08 (s, 1H), 7.27 (ddd,  $J = 8.4, 7.2, 3.0$  Hz, 2H), 7.33 (ddd,  $J = 10.8, 8.4, 1.8$  Hz, 2H), 7.38-7.42 (m, 1H), 7.41 (d,  $J = 12.0$  Hz, 2H), 7.44 (d,  $J = 10.2$  Hz, 2H), 7.43-7.48 (m, 2H), 7.48-7.52 (m, 1H), 7.71 (ddd,  $J = 11.4, 8.4, 1.2$  Hz, 2H); <sup>13</sup>C NMR (150 MHz, CDCl<sub>3</sub>)  $\delta$  21.3, 24.7 (d,  $J = 67.5$  Hz), 25.9, 26.7, 26.9, 30.4, 32.2 (d,  $J = 11.4$  Hz), 36.6 (dd,  $J = 67.5, 4.4$  Hz), 38.1, 128.3 (d,  $J = 11.4$  Hz), 128.5 (d,  $J = 8.7$  Hz), 128.6 (d,  $J = 11.6$  Hz), 128.7 (d,  $J = 8.7$  Hz), 130.4 (d,  $J = 8.6$  Hz), 130.8 (d,  $J = 10.1$  Hz), 131.3, 131.6 (d,  $J = 2.9$  Hz), 132.66 (d,  $J = 93.3$  Hz), 132.72 (d,  $J = 94.8$  Hz), 133.2 (d,  $J = 3.0$  Hz), 133.3, 133.7 (d,  $J = 99.2$  Hz), 134.0 (d,  $J = 97.7$  Hz), 138.2 (d,  $J = 11.4$  Hz), 138.3 (d,  $J = 11.6$  Hz); <sup>31</sup>P NMR (243 MHz, CDCl<sub>3</sub>)  $\delta$  30.2 (d,  $J = 42.8$  Hz), 38.4 (d,  $J = 42.8$  Hz); IR (ATR): 3427, 3055, 3025, 2925, 2853, 1600, 1485, 1453, 1438, 1418, 1378, 1273, 1182, 1121, 1102, 1071, 1044, 997, 870, 850, 818, 749, 735, 721, 696  $\text{cm}^{-1}$ ; HRMS (ESI) Calcd for  $\text{C}_{36}\text{H}_{42}\text{O}_2\text{P}_2$   $[\text{M}+\text{Na}]^+$  591.2552, Found 591.2552; mp. 256.0-258.0  $^\circ\text{C}$ .

**(S)-1-Cyclohexyl-1-(di(2-naphthyl)phosphoryl)-2-(diphenylphosphoryl)ethane (4af):**

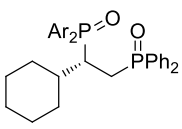  
Ar = 2-naphthyl

45 mg, 74% yield; White powder; SFC analysis DAICEL Chiralpak ID-3/SFC 4.6×150 mm (CO<sub>2</sub>/MeOH = 80/20, 3.0 mL/min, 220 nm, 40  $^\circ\text{C}$ ) 20.4 (minor), 33.9 (major) min; 25% ee; Optical rotation  $[\alpha]_{\text{D}}^{27} = +12.0$  (c 0.090, CHCl<sub>3</sub>); <sup>1</sup>H NMR (600 MHz, CDCl<sub>3</sub>)  $\delta$  0.74-0.91 (m, 3H), 0.94-1.05 (m, 1H), 1.32-1.41 (m, 2H), 1.44-1.55 (m, 2H), 1.65-1.71 (m, 1H), 1.76-1.88 (m, 2H), 2.69-2.83 (m, 2H), 3.29-3.38 (m, 1H), 6.98 (ddd,  $J = 7.8, 7.8, 3.0$  Hz, 2H), 7.18 (ddd,  $J = 7.8, 7.2, 1.2$  Hz, 1H), 7.22 (ddd,  $J = 11.4, 8.4, 1.2$  Hz, 2H), 7.42-7.46 (m, 2H), 7.47-7.58 (m, 5H), 7.70 (ddd,  $J = 11.4, 8.4, 1.2$  Hz, 2H), 7.75-7.82 (m, 4H), 7.84 (d,  $J = 7.8$  Hz, 1H), 7.87-7.91 (m, 2H), 7.93 (d,  $J = 7.8$  Hz, 1H), 8.49 (d,  $J = 12.0$  Hz, 1H), 8.52 (d,  $J = 13.2$  Hz, 1H); <sup>13</sup>C NMR (150 MHz, CDCl<sub>3</sub>)  $\delta$  24.8 (d,  $J = 67.5$  Hz), 25.8, 26.6, 26.8, 30.6, 32.0 (d,  $J = 10.1$  Hz), 36.4 (dd,  $J = 67.5, 4.2$  Hz), 38.6, 125.7 (d,  $J = 11.6$  Hz), 125.8 (d,  $J = 10.1$  Hz), 126.7, 126.9, 127.7, 127.8, 127.96, 128.03, 128.2 (d,  $J = 11.4$  Hz), 128.4 (d,  $J = 10.1$  Hz), 128.59 (d,  $J = 11.4$  Hz), 128.63 (d,  $J = 11.4$  Hz), 128.9, 129.0, 129.9 (d,  $J = 94.8$  Hz), 130.2 (d,  $J = 94.8$  Hz), 130.3 (d,  $J = 8.6$  Hz), 130.7 (d,  $J = 10.1$  Hz), 131.2 (d,  $J = 2.9$  Hz), 131.7, 132.5 (d,  $J = 12.9$  Hz), 132.6 (d,  $J = 12.9$  Hz), 132.7, 132.99 (d,  $J = 7.1$  Hz), 133.01 (d,  $J = 99.2$  Hz), 133.2 (d,  $J = 7.1$  Hz), 133.8 (d,  $J = 97.7$  Hz), 134.5 (d,  $J = 5.7$  Hz); <sup>31</sup>P NMR (243 MHz, CDCl<sub>3</sub>)  $\delta$  30.3 (d,  $J = 39.6$  Hz), 37.8 (d,  $J = 39.6$  Hz); IR (ATR): 3426, 3055, 2964, 2927, 2852, 1627, 1591, 1500, 1450, 1438, 1341, 1271, 1181, 1134, 1118, 1086, 859, 820, 745, 718, 696, 658, 615  $\text{cm}^{-1}$ ; HRMS (ESI) Calcd for  $\text{C}_{40}\text{H}_{38}\text{O}_2\text{P}_2$   $[\text{M}+\text{Na}]^+$  635.2239, Found 635.2239; mp. 254.0-256.0  $^\circ\text{C}$ .

**(S)-1-(Bis(3,5-dimethylphenyl)phosphoryl)-2-(bis(4-trifluoromethylphenyl)phosphoryl)-1-cyclohexylethane**

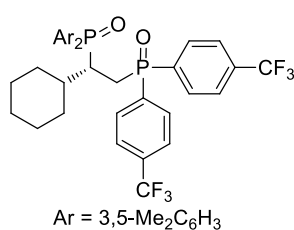

**(4be):**

42 mg, 60% yield; White powder; SFC analysis DAICEL Chiralpak IA-3/SFC 4.6×150 mm (CO<sub>2</sub>/MeOH = 95/5, 3.0 mL/min, 220 nm, 40 °C) 3.2 (major), 4.9 (minor) min; 93% ee; Optical rotation [ $\alpha$ ]<sub>D</sub><sup>28</sup> = +17.2 (c 0.135, CHCl<sub>3</sub>); <sup>1</sup>H NMR (600 MHz, CDCl<sub>3</sub>)  $\delta$  0.81-1.05 (m, 4H), 1.18-1.29 (m, 1H), 1.42-1.51 (m, 1H), 1.58-1.76 (m, 4H), 1.82-1.89 (m, 1H), 2.21 (s, 6H), 2.33 (s, 6H), 2.55-2.65 (m, 1H), 2.84-2.95 (m, 1H), 2.98-3.07 (m, 1H), 6.88 (s, 1H), 7.10 (s, 1H), 7.34 (d, *J* = 10.2 Hz, 2H), 7.39 (d, *J* = 10.8 Hz, 2H), 7.49-7.54 (m, 4H), 7.72 (dd, *J* = 8.4, 2.4 Hz, 2H), 7.82 (dd, *J* = 10.8, 8.4 Hz, 2H); <sup>13</sup>C NMR (150 MHz, CDCl<sub>3</sub>)  $\delta$  21.1, 21.3, 23.7 (d, *J* = 70.4 Hz), 25.8, 26.3, 26.7, 29.7, 32.4 (d, *J* = 11.6 Hz), 36.4 (dd, *J* = 67.5, 4.4 Hz), 38.3, 123.4 (qd, *J* = 271.5, 2.9 Hz), 125.1 (dq, *J* = 11.6, 4.4 Hz), 125.7 (dq, *J* = 11.6, 4.4 Hz), 128.5 (d, *J* = 7.2 Hz), 130.7 (d, *J* = 8.6 Hz), 130.8 (d, *J* = 8.7 Hz), 131.9 (d, *J* = 94.8 Hz), 132.2 (d, *J* = 93.3 Hz), 133.2 (q, *J* = 33.0 Hz), 133.4, 133.5 (d, *J* = 2.9 Hz), 133.8 (qd, *J* = 33.2, 2.9 Hz), 136.9 (d, *J* = 94.8 Hz), 138.26, 138.35, 138.6 (d, *J* = 92.0 Hz); <sup>31</sup>P NMR (243 MHz, CDCl<sub>3</sub>)  $\delta$  28.3 (d, *J* = 33.0 Hz), 37.4 (d, *J* = 33.0 Hz); IR (ATR): 3435, 3038, 2990, 2926, 2854, 1602, 1450, 1400, 1320, 1273, 1168, 1127, 1101, 1062, 1017, 871, 848, 819, 788, 755, 722, 707, 696, 665, 627, 605 cm<sup>-1</sup>; HRMS (ESI) Calcd for C<sub>38</sub>H<sub>40</sub>F<sub>6</sub>O<sub>2</sub>P<sub>2</sub> [M+Na]<sup>+</sup> 727.2300, Found 727.2300; mp. 246.0-248.0 °C.

**(S)-1-(Bis(3,5-dimethylphenyl)phosphoryl)-1-cyclohexyl-2-(di-*para*-tolylphosphoryl)ethane (4ce):**

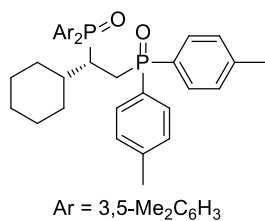

78% yield (NMR); White powder; SFC analysis DAICEL Chiralpak ID-3/SFC 4.6×150 mm (CO<sub>2</sub>/MeOH = 80/20, 3.0 mL/min, 220 nm, 40 °C) 4.3 (minor), 5.7 (major) min; 89% ee; Optical rotation [ $\alpha$ ]<sub>D</sub><sup>27</sup> = +24.9 (c 0.150, CHCl<sub>3</sub>); <sup>1</sup>H NMR (600 MHz, CDCl<sub>3</sub>)  $\delta$  0.76-0.99 (m, 4H), 1.27-1.42 (m, 2H), 1.47-1.58 (m, 3H), 1.68-1.76 (m, 2H), 2.28 (s, 6H), 2.32 (s, 6H), 2.33 (s, 3H), 2.38 (s, 3H), 2.53-2.68 (m, 2H), 2.93-3.02 (m, 1H), 7.01 (s, 1H), 7.06 (dd, *J* = 7.8, 2.4 Hz, 2H), 7.08 (s, 1H), 7.19 (dd, *J* = 10.8, 7.8 Hz, 2H), 7.25 (dd, *J* = 7.8, 2.4 Hz, 2H), 7.40 (d, *J* = 11.4 Hz, 2H), 7.42 (d, *J* = 10.8 Hz, 2H), 7.57 (dd, *J* = 10.8, 7.8 Hz, 2H); <sup>13</sup>C NMR (150 MHz, CDCl<sub>3</sub>)  $\delta$  21.26, 21.28, 21.4, 21.5, 24.7 (d, *J* = 68.9 Hz), 25.9, 26.7, 26.9, 30.4, 32.1 (d, *J* = 10.1 Hz), 36.6 (dd, *J* = 67.5, 4.4 Hz), 38.1, 128.5 (d, *J* = 8.7 Hz), 128.7 (d, *J* = 10.1 Hz), 129.0 (d, *J* = 11.4 Hz), 129.2 (d, *J* = 12.9 Hz), 130.4 (d, *J* = 100.1 Hz), 130.5 (d, *J* = 10.1 Hz), 130.7 (d, *J* = 10.1 Hz), 130.8 (d, *J* = 103.5 Hz), 132.6 (d, *J* = 93.5 Hz), 132.7 (d, *J* = 93.3 Hz), 133.0, 133.2 (d, *J* = 2.9 Hz), 138.1 (d, *J* = 11.4 Hz), 138.2 (d, *J* = 11.6 Hz), 141.5 (d, *J* = 2.9 Hz), 141.9 (d, *J* = 3.0 Hz); <sup>31</sup>P NMR (243 MHz, CDCl<sub>3</sub>)  $\delta$  30.7 (d, *J* = 42.8 Hz), 38.5 (d, *J* = 42.8 Hz); IR (ATR): 3436, 3038, 2980, 2924, 2853, 1652, 1602, 1449, 1418, 1272, 1183, 1118, 1100, 888, 871, 850, 809, 742, 728, 705, 651 cm<sup>-1</sup>; HRMS (ESI) Calcd for C<sub>38</sub>H<sub>46</sub>O<sub>2</sub>P<sub>2</sub> [M+Na]<sup>+</sup> 619.2865, Found 619.2865; mp. 242.0-244.0 °C.

**(S)-1-(Bis(3,5-dimethylphenyl)phosphoryl)-1-cyclopentyl-2-(diphenylphosphoryl)ethane (4ee):**

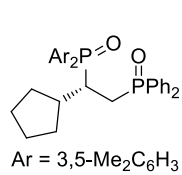

46 mg, 83% yield; White powder; SFC analysis DAICEL Chiralpak ID-3/SFC 4.6×150 mm (CO<sub>2</sub>/MeOH = 80/20, 3.0 mL/min, 220 nm, 40 °C) 3.8 (minor), 5.3 (major) min; 95% ee; Optical rotation [ $\alpha$ ]<sub>D</sub><sup>28</sup> = -5.3 (c 0.170, CHCl<sub>3</sub>); <sup>1</sup>H NMR (600 MHz, CDCl<sub>3</sub>)  $\delta$  1.13-1.41 (m, 6H), 1.48-1.56 (m, 1H), 2.11-2.19 (m, 1H), 2.22 (s, 6H), 2.33 (s, 6H), 2.41-2.49 (m, 1H), 2.76-2.87 (m, 1H), 3.35-3.44 (m, 1H), 6.90 (s, 1H), 7.08 (s, 1H), 7.19-7.26 (m, 4H), 7.36 (ddd, *J* = 7.2, 7.2, 1.2 Hz, 1H), 7.44 (d,

$J = 11.4$  Hz, 2H), 7.46 (d,  $J = 12.6$  Hz, 2H), 7.41-7.50 (m, 3H), 7.68 (ddd,  $J = 11.4, 7.2, 1.2$  Hz, 2H);  $^{13}\text{C}$  NMR (150 MHz,  $\text{CDCl}_3$ )  $\delta$  21.2, 21.3, 24.6, 24.9, 25.4 (d,  $J = 68.9$  Hz), 29.5 (d,  $J = 4.2$  Hz), 31.6, 33.9 (dd,  $J = 69.0, 4.4$  Hz), 39.6, 128.2 (d,  $J = 11.4$  Hz), 128.3 (d,  $J = 8.6$  Hz), 128.6 (d,  $J = 11.4$  Hz), 128.7 (d,  $J = 8.7$  Hz), 130.2 (d,  $J = 8.7$  Hz), 130.5 (d,  $J = 8.6$  Hz), 131.1 (d,  $J = 2.9$  Hz), 131.5 (d,  $J = 2.9$  Hz), 132.4 (d,  $J = 93.3$  Hz), 132.9 (d,  $J = 93.3$  Hz), 133.2 (d,  $J = 2.9$  Hz), 133.3, 133.8 (d,  $J = 99.0$  Hz), 134.3 (d,  $J = 97.7$  Hz), 138.2 (d,  $J = 11.4$  Hz), 138.3 (d,  $J = 11.6$  Hz);  $^{31}\text{P}$  NMR (243 MHz,  $\text{CDCl}_3$ )  $\delta$  29.8 (d,  $J = 32.8$  Hz), 37.8 (d,  $J = 32.8$  Hz); IR (ATR): 3435, 3055, 3024, 2956, 2919, 2868, 1633, 1601, 1482, 1452, 1438, 1418, 1378, 1308, 1273, 1179, 1120, 1104, 1070, 1040, 997, 943, 872, 851, 802, 747, 732, 696, 665, 621  $\text{cm}^{-1}$ ; HRMS (ESI) Calcd for  $\text{C}_{35}\text{H}_{40}\text{O}_2\text{P}_2$   $[\text{M}+\text{Na}]^+$  577.2396, Found 577.2395; mp. 143.0-146.0  $^\circ\text{C}$ .

**(S)-1-(Bis(3,5-dimethylphenyl)phosphoryl)-1-cyclopropyl-2-(diphenylphosphoryl)ethane (4fe):**

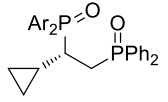 52 mg, 99% yield; White powder; SFC analysis DAICEL Chiralpak ID-3/SFC 4.6×150 mm ( $\text{CO}_2/\text{MeOH} = 85/15$ , 3.0 mL/min, 220 nm, 40  $^\circ\text{C}$ ) 5.2 (minor), 6.0 (major) min; 87% ee; Optical rotation  $[\alpha]_{\text{D}}^{26} = -2.3$  (c 0.160,  $\text{CHCl}_3$ );  $^1\text{H}$  NMR (600 MHz,  $\text{CDCl}_3$ )  $\delta$  -0.48--0.97 (m, 1H), -0.36--0.29 (m, 1H), -0.04--0.03 (m, 1H), 0.09-0.16 (m, 1H), 0.78-0.87 (m, 1H), 2.30 (s, 6H), 2.34 (s, 6H), 2.44-2.54 (m, 1H), 2.64-2.81 (m, 2H), 7.08 (s, 1H), 7.11 (s, 1H), 7.31 (ddd,  $J = 7.8, 7.2, 3.0$  Hz, 2H), 7.39 (d,  $J = 11.4$  Hz, 2H), 7.38-7.42 (m, 1H), 7.43-7.52 (m, 5H), 7.52 (d,  $J = 9.6$  Hz, 2H), 7.85 (ddd,  $J = 12.0, 9.0, 1.2$  Hz, 2H);  $^{13}\text{C}$  NMR (150 MHz,  $\text{CDCl}_3$ )  $\delta$  6.0 (d,  $J = 14.3$  Hz), 6.6, 10.7, 21.16, 21.22, 29.8 (d,  $J = 69.0$  Hz), 36.9 (dd,  $J = 68.9, 4.4$  Hz), 128.38 (d,  $J = 11.6$  Hz), 128.44 (d,  $J = 11.6$  Hz), 128.6 (d,  $J = 8.6$  Hz), 128.8 (d,  $J = 8.6$  Hz), 130.1 (d,  $J = 10.1$  Hz), 130.9 (d,  $J = 8.7$  Hz), 131.3, 131.5 (d,  $J = 2.9$  Hz), 131.5 (d,  $J = 93.5$  Hz), 132.4 (d,  $J = 94.8$  Hz), 133.2 (d,  $J = 2.9$  Hz), 133.4 (d,  $J = 97.7$  Hz), 133.5, 134.7 (d,  $J = 99.2$  Hz), 137.8 (d,  $J = 11.4$  Hz), 138.5 (d,  $J = 11.4$  Hz);  $^{31}\text{P}$  NMR (243 MHz,  $\text{CDCl}_3$ )  $\delta$  30.7 (d,  $J = 42.8$  Hz), 38.2 (d,  $J = 42.8$  Hz); IR (ATR): 3429, 3080, 3056, 3008, 2976, 2965, 2919, 2863, 1743, 1658, 1601, 1489, 1438, 1368, 1273, 1219, 1178, 1121, 1029, 850, 738, 710, 697  $\text{cm}^{-1}$ ; HRMS (ESI) Calcd for  $\text{C}_{33}\text{H}_{36}\text{O}_2\text{P}_2$   $[\text{M}+\text{Na}]^+$  549.2083, Found 549.2082; mp. 163.0-166.0  $^\circ\text{C}$ .

**(S)-1,2-Bis(diphenylphosphoryl)propane (4ga):**

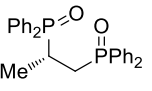 44 mg, 99% yield; White powder; SFC analysis DAICEL Chiralpak ID-3/SFC 4.6×150 mm ( $\text{CO}_2/\text{MeOH} = 80/20$ , 3.0 mL/min, 220 nm, 40  $^\circ\text{C}$ ) 6.1 (minor), 7.8 (major) min; 65% ee; Optical rotation  $[\alpha]_{\text{D}}^{27} = -12.8$  (c 0.030,  $\text{CHCl}_3$ );  $^1\text{H}$  NMR (600 MHz,  $\text{CDCl}_3$ )  $\delta$  1.20 (dd,  $J = 17.4, 7.2$  Hz, 2H), 2.44-2.62 (m, 2H), 2.92-3.03 (m, 1H), 7.38-7.47 (m, 8H), 7.47-7.57 (m, 6H), 7.68-7.76 (m, 6H);  $^{13}\text{C}$  NMR (150 MHz,  $\text{CDCl}_3$ )  $\delta$  13.6 (d,  $J = 2.9$  Hz), 26.8 (dd,  $J = 70.4, 4.4$  Hz), 28.7 (d,  $J = 67.5$  Hz), 128.59 (d,  $J = 10.5$  Hz), 128.67 (d,  $J = 11.6$  Hz), 128.71 (d,  $J = 11.6$  Hz), 128.9 (d,  $J = 11.6$  Hz), 130.5 (d,  $J = 10.1$  Hz), 130.7 (d,  $J = 10.1$  Hz), 131.0 (d,  $J = 8.7$  Hz, 2C), 131.03 (d,  $J = 95.4$  Hz), 131.1 (d,  $J = 94.8$  Hz), 131.76, 131.77 (d,  $J = 3.0$  Hz), 131.8, 131.9 (d,  $J = 2.9$  Hz), 132.6 (d,  $J = 99.1$  Hz), 133.3 (d,  $J = 97.7$  Hz);  $^{31}\text{P}$  NMR (243 MHz,  $\text{CDCl}_3$ )  $\delta$  31.8 (d,  $J = 49.3$  Hz), 38.2 (d,  $J = 49.3$  Hz); IR (ATR): 3430, 3078, 3057, 2976, 2940, 2904, 1653, 1590, 1484, 1438, 1404, 1311, 1179, 1119, 1102, 1072, 1028, 998, 805, 745, 723, 695, 677  $\text{cm}^{-1}$ ; HRMS (ESI) Calcd for  $\text{C}_{27}\text{H}_{26}\text{O}_2\text{P}_2$   $[\text{M}+\text{Na}]^+$  467.1300, Found 467.1300; mp. 169.0-171.0  $^\circ\text{C}$ .

**(R)-1,2-Bis(diphenylphosphoryl)propane (ent-4ga):**

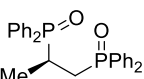 Prepared from commercially available (*R*)-prophos, 44 mg, 99% yield; White powder; SFC analysis DAICEL Chiralpak ID-3/SFC 4.6×150 mm (CO<sub>2</sub>/MeOH = 80/20, 3.0 mL/min, 220 nm, 40 °C) 5.1 (major), 7.2 (major) min; >99% ee; Optical rotation [ $\alpha$ ]<sub>D</sub><sup>27</sup> = +22.9 (c 0.150, CHCl<sub>3</sub>).

**(S)-2-(Bis(3,5-dimethylphenyl)phosphoryl)-1-(diphenylphosphoryl)propane (4ge):**

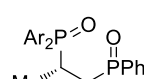 50 mg, 99% yield; White sticky oil; SFC analysis DAICEL Chiralpak ID-3/SFC 4.6×150 mm (CO<sub>2</sub>/MeOH = 80/20, 3.0 mL/min, 220 nm, 40 °C) 3.8 (minor), 4.3 (major) min; 94% ee; Optical rotation [ $\alpha$ ]<sub>D</sub><sup>28</sup> = -8.6 (c 0.115, CHCl<sub>3</sub>); <sup>1</sup>H NMR (600 MHz, CDCl<sub>3</sub>)  $\delta$  1.17 (dd, *J* = 16.8, 7.2 Hz, 3H), 2.31 (s, 12H), 2.43-2.52 (m, 1H), 2.54-2.63 (m, 1H), 2.91-3.02 (m, 1H), 7.09 (s, 1H), 7.12 (s, 1H), 7.34 (d, *J* = 11.4 Hz, 2H), 7.37 (d, *J* = 11.4 Hz, 2H), 7.39 (ddd, *J* = 7.8, 7.2, 2.4 Hz, 2H), 7.42-7.46 (m, 2H), 7.47-7.51 (m, 2H), 7.53 (ddd, *J* = 10.8, 7.8, 1.8 Hz, 2H), 7.71 (ddd, *J* = 11.4, 8.4, 1.2 Hz, 2H); <sup>13</sup>C NMR (150 MHz, CDCl<sub>3</sub>)  $\delta$  13.7, 21.2, 21.3, 26.8 (dd, *J* = 68.9, 4.4 Hz), 28.7 (d, *J* = 68.9 Hz), 128.46 (d, *J* = 8.7 Hz), 128.51 (d, *J* = 8.4 Hz), 128.60 (d, *J* = 11.6 Hz), 128.61 (d, *J* = 11.6 Hz), 130.6 (d, *J* = 8.6 Hz, 2C), 131.0 (d, *J* = 94.8 Hz), 131.2 (d, *J* = 94.7 Hz), 131.6 (d, *J* = 2.9 Hz), 131.7, 133.0 (d, *J* = 104.9 Hz), 133.4 (d, *J* = 3.0 Hz), 133.5, 133.6 (d, *J* = 103.5 Hz), 138.3 (d, *J* = 11.6 Hz), 138.5 (d, *J* = 11.6 Hz); <sup>31</sup>P NMR (243 MHz, CDCl<sub>3</sub>)  $\delta$  30.2 (d, *J* = 42.8 Hz), 38.4 (d, *J* = 42.8 Hz); IR (ATR): 3445, 3054, 3023, 2972, 2919, 2857, 1747, 1601, 1438, 1274, 1181, 1122, 1104, 1072, 1038, 996, 873, 851, 805, 745, 721, 711, 695 cm<sup>-1</sup>; HRMS (ESI) Calcd for C<sub>31</sub>H<sub>34</sub>O<sub>2</sub>P<sub>2</sub> [M+Na]<sup>+</sup> 523.1926, Found 523.1926.

**(S)-2-(Bis(3,5-dimethylphenyl)phosphoryl)-1-(diphenylphosphoryl)hexane (4he):**

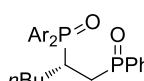 54 mg, 99% yield; White powder; SFC analysis DAICEL Chiralpak ID-3/SFC 4.6×150 mm (CO<sub>2</sub>/MeOH = 90/10, 3.0 mL/min, 220 nm, 40 °C) 11.7 (minor), 14.4 (major) min; 96% ee; Optical rotation [ $\alpha$ ]<sub>D</sub><sup>28</sup> = +19.8 (c 0.300, CHCl<sub>3</sub>); <sup>1</sup>H NMR (600 MHz, CDCl<sub>3</sub>)  $\delta$  0.53 (t, *J* = 7.2 Hz, 3H), 0.77-0.87 (m, 2H), 0.89-0.99 (m, 1H), 1.19-1.28 (m, 1H), 1.39-1.49 (m, 1H), 1.63-1.77 (m, 1H), 2.31 (s, 12H), 2.56-2.63 (m, 2H), 2.94-3.04 (m, 1H), 7.08 (s, 2H), 7.35 (ddd, *J* = 8.4, 7.8, 3.0 Hz, 2H), 7.37 (d, *J* = 12.0 Hz, 2H), 7.42-7.52 (m, 8H), 7.74 (ddd, *J* = 11.4, 8.4, 1.2 Hz, 2H); <sup>13</sup>C NMR (150 MHz, CDCl<sub>3</sub>)  $\delta$  13.3, 21.17, 21.25, 22.5, 27.5 (d, *J* = 69.0 Hz), 27.9, 29.0 (d, *J* = 4.2 Hz), 31.1 (dd, *J* = 68.9, 2.9 Hz), 128.45 (d, *J* = 10.1 Hz), 128.53 (d, *J* = 8.4 Hz), 128.6 (d, *J* = 8.6 Hz), 130.4 (d, *J* = 8.7 Hz), 130.7 (d, *J* = 8.7 Hz), 131.5, 131.7 (d, *J* = 2.9 Hz), 131.8 (d, *J* = 93.5 Hz, 2C), 133.18 (d, *J* = 2.9 Hz), 133.35 (d, *J* = 2.9 Hz), 133.50 (d, *J* = 99.0 Hz), 133.51 (d, *J* = 96.2 Hz), 138.1 (d, *J* = 11.4 Hz), 138.4 (d, *J* = 12.9 Hz); <sup>31</sup>P NMR (243 MHz, CDCl<sub>3</sub>)  $\delta$  30.7 (d, *J* = 46.2 Hz), 38.4 (d, *J* = 46.2 Hz); IR (ATR): 3436, 3055, 3023, 2955, 2932, 2862, 1601, 1485, 1465, 1438, 1416, 1379, 1311, 1273, 1181, 1120, 1071, 997, 872, 850, 812, 743, 716, 697 cm<sup>-1</sup>; HRMS (ESI) Calcd for C<sub>34</sub>H<sub>40</sub>O<sub>2</sub>P<sub>2</sub> [M+Na]<sup>+</sup> 565.2396, Found 565.2396; mp. 172.0-174.0 °C.

**(S)-2-(Bis(3,5-dimethylphenyl)phosphoryl)-1-(diphenylphosphoryl)-3-phenylpropane (4ie):**

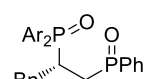 52 mg, 90% yield; White powder; SFC analysis DAICEL Chiralpak ID-3/SFC 4.6×150 mm (CO<sub>2</sub>/MeOH = 80/20, 3.0 mL/min, 220 nm, 40 °C) 6.5 (minor), 7.7 (major) min; 95% ee; Optical rotation [ $\alpha$ ]<sub>D</sub><sup>27</sup> = +14.2 (c 0.195, CHCl<sub>3</sub>); <sup>1</sup>H NMR (600 MHz, CDCl<sub>3</sub>)  $\delta$  2.16 (s, 6H), 2.25 (s, 6H), 2.53-2.68 (m, 2H), 3.01-3.17 (m, 2H), 3.39-3.49 (m, 1H), 6.90 (s, 1H), 6.90-6.96 (m, 5H), 7.00 (s, 1H), 7.15 (d, *J* = 11.4 Hz, 2H), 7.28-7.47 (m, 8H), 7.38 (d, *J* = 11.4 Hz, 2H), 7.55 (ddd, *J* = 11.4, 8.4, 1.2 Hz, 2H); <sup>13</sup>C NMR (150

MHz CDCl<sub>3</sub>)  $\delta$  21.1, 21.2, 28.0 (d,  $J = 67.5$  Hz), 33.2 (dd,  $J = 67.5, 4.2$  Hz), 34.5, 125.8, 127.6, 128.37 (d,  $J = 8.6$  Hz), 128.40 (d,  $J = 11.6$  Hz), 128.42 (d,  $J = 8.6$  Hz), 128.5 (d,  $J = 11.6$  Hz), 129.2, 130.4 (d,  $J = 10.1$  Hz, 2C), 131.48 (d,  $J = 94.8$  Hz), 131.4, 131.5, 132.0 (d,  $J = 94.8$  Hz), 133.1 (d,  $J = 2.9$  Hz), 133.3 (d,  $J = 2.9$  Hz), 133.36 (d,  $J = 99.2$  Hz), 133.8 (d,  $J = 99.2$  Hz), 137.8 (d,  $J = 11.4$  Hz), 138.3 (d,  $J = 11.6$  Hz), 138.9 (d,  $J = 4.4$  Hz); <sup>31</sup>P NMR (243 MHz, CDCl<sub>3</sub>)  $\delta$  30.3 (d,  $J = 39.4$  Hz), 36.9 (d,  $J = 39.4$  Hz); IR (ATR): 3429, 3057, 3028, 2981, 2952, 2918, 2860, 1602, 1485, 1456, 1438, 1415, 1273, 1182, 1121, 1106, 1072, 1038, 1030, 997, 873, 850, 739, 718, 697 cm<sup>-1</sup>; HRMS (ESI) Calcd for C<sub>37</sub>H<sub>38</sub>O<sub>2</sub>P<sub>2</sub> [M+Na]<sup>+</sup> 599.2239, Found 599.2238; mp. 82.0-84.0 °C.

**(S)-2-(Bis(3,5-dimethylphenyl)phosphoryl)-1-(diphenylphosphoryl)-6-(methoxymethyl)oxyhexane (4je):**

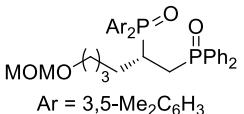

60 mg, 99% yield; White powder; SFC analysis DAICEL Chiralpak ID-3/SFC 4.6×150 mm (CO<sub>2</sub>/MeOH = 90/10, 3.0 mL/min, 220 nm, 40 °C) 14.0 (minor), 15.4 (major) min; 97% ee; Optical rotation [ $\alpha$ ]<sub>D</sub><sup>27</sup> = +16.7 (c 0.220, CHCl<sub>3</sub>); <sup>1</sup>H NMR (600 MHz, CDCl<sub>3</sub>)  $\delta$  1.00-1.09 (m, 1H), 1.10-1.17 (m, 2H), 1.30-1.40 (m, 1H), 1.44-1.55 (m, 1H), 1.70-1.82 (m, 1H), 2.30 (s, 6H), 2.31 (s, 6H), 2.55-2.65 (m, 2H), 2.93-3.04 (m, 1H), 3.10-3.18 (m, 2H), 3.26 (s, 3H), 4.45 (s, 2H), 7.08 (s, 2H), 7.35 (ddd,  $J = 7.8, 7.8, 2.4$  Hz, 2H), 7.37 (d,  $J = 10.8$  Hz, 2H), 7.42 (d,  $J = 10.8$  Hz, 2H), 7.43-7.53 (m, 6H), 7.73 (ddd,  $J = 11.4, 8.4, 1.8$  Hz, 2H); <sup>13</sup>C NMR (150 MHz, CDCl<sub>3</sub>)  $\delta$  21.18, 21.25, 23.6 (d,  $J = 4.2$  Hz), 27.4 (d,  $J = 69.0$  Hz), 28.2, 29.5, 31.2 (dd,  $J = 69.0, 4.4$  Hz), 54.9, 67.2, 96.1, 128.3 (d,  $J = 10.1$  Hz), 128.5 (d,  $J = 11.4$  Hz), 128.56 (d,  $J = 10.1$  Hz), 128.58 (d,  $J = 11.7$  Hz), 130.4 (d,  $J = 8.6$  Hz), 130.6 (d,  $J = 10.1$  Hz), 131.5, 131.67 (d,  $J = 93.3$  Hz), 131.71, 131.71 (d,  $J = 94.8$  Hz), 133.31 (d,  $J = 97.7$  Hz), 133.35 (d,  $J = 3.0$  Hz), 133.40, 133.51 (d,  $J = 97.7$  Hz), 138.2 (d,  $J = 11.4$  Hz), 138.4 (d,  $J = 11.4$  Hz); <sup>31</sup>P NMR (243 MHz, CDCl<sub>3</sub>)  $\delta$  30.7 (d,  $J = 45.9$  Hz), 38.1 (d,  $J = 45.9$  Hz); IR (ATR): 3428, 3055, 2990, 2945, 2923, 2866, 2821, 1637, 1601, 1460, 1438, 1419, 1379, 1273, 1181, 1146, 1117, 1074, 1039, 998, 918, 872, 850, 817, 741, 716, 696 cm<sup>-1</sup>; HRMS (ESI) Calcd for C<sub>36</sub>H<sub>44</sub>O<sub>4</sub>P<sub>2</sub> [M+Na]<sup>+</sup> 625.2607, Found 625.2606; mp. 139.0-142.0 °C.

**(S)-2-(Bis(3,5-dimethylphenyl)phosphoryl)-1-(diphenylphosphoryl)-3,3-dimethylbutane (4ke):**

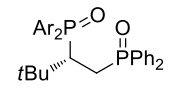

88% yield (NMR); White powder; SFC analysis DAICEL Chiralpak ID-3/SFC 4.6×150 mm (CO<sub>2</sub>/MeOH = 85/15, 3.0 mL/min, 220 nm, 40 °C) 3.5 (minor), 4.2 (major) min; 49% ee; Optical rotation [ $\alpha$ ]<sub>D</sub><sup>28</sup> = +8.8 (c 0.125, CHCl<sub>3</sub>); <sup>1</sup>H NMR (600 MHz, CDCl<sub>3</sub>)  $\delta$  0.88 (s, 9H), 2.11 (s, 6H), 2.22 (s, 6H), 2.45 (dddd,  $J = 16.8, 9.0, 6.0, 6.0$  Hz, 1H), 2.88 (dddd,  $J = 23.4, 16.8, 12.0, 3.6$  Hz, 1H), 3.43 (dddd,  $J = 22.8, 6.0, 6.0, 3.6$  Hz, 1H), 6.57 (s, 1H), 7.06 (s, 1H), 7.16-7.22 (m, 4H), 7.30-7.35 (m, 1H), 7.37-7.46 (m, 3H), 7.48 (d,  $J = 10.8$  Hz, 2H), 7.61 (d,  $J = 11.4$  Hz, 2H), 7.64 (ddd,  $J = 11.4, 8.4, 1.2$  Hz, 2H); <sup>13</sup>C NMR (150 MHz, CDCl<sub>3</sub>)  $\delta$  21.2, 21.3, 25.8 (d,  $J = 67.5$  Hz), 30.2 (d,  $J = 7.1$  Hz), 35.4, 40.6 (dd,  $J = 67.5, 4.4$  Hz), 127.9 (d,  $J = 11.6$  Hz), 128.3 (d,  $J = 8.6$  Hz), 128.5 (d,  $J = 11.6$  Hz), 128.6 (d,  $J = 8.6$  Hz), 129.6 (d,  $J = 10.1$  Hz), 130.2 (d,  $J = 8.6$  Hz), 130.8, 131.2 (d,  $J = 2.9$  Hz), 132.7, 133.0, 133.5 (d,  $J = 94.8$  Hz), 134.7 (d,  $J = 99.0$  Hz), 135.3 (d,  $J = 91.8$  Hz), 135.4 (d,  $J = 97.7$  Hz), 138.0 (d,  $J = 11.6$  Hz), 138.1 (d,  $J = 10.1$  Hz); <sup>31</sup>P NMR (243 MHz, CDCl<sub>3</sub>)  $\delta$  27.7 (d,  $J = 26.5$  Hz), 36.7 (d,  $J = 26.5$  Hz); IR (ATR): 3437, 3055, 2960, 2916, 2871, 1601, 1470, 1438, 1371, 1271, 1182, 1119, 1107, 1071, 1041, 997, 869, 849, 824, 750, 729, 699, 665 cm<sup>-1</sup>; HRMS (ESI) Calcd for C<sub>34</sub>H<sub>40</sub>O<sub>2</sub>P<sub>2</sub> [M+Na]<sup>+</sup> 565.2396, Found 565.2396; mp. 221.0-224.0 °C.

## Procedure for Transformation of Diphosphine Dioxides 4

### Transformation of 4ae into 6ae (Scheme 4)<sup>4</sup>

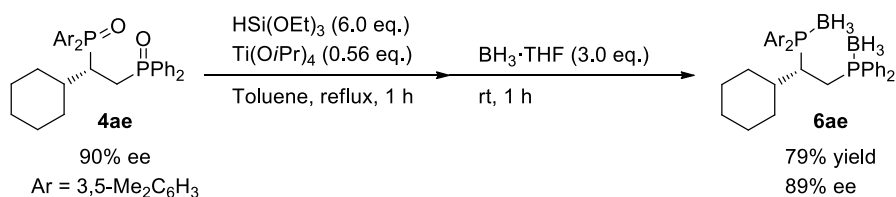

To a solution of **4ae** (28 mg, 0.049 mmol, 90% ee) in toluene (1.5 mL) were sequentially added triethoxysilane (54  $\mu$ L, 0.30 mmol) and Ti(OiPr)<sub>4</sub> (8.2  $\mu$ L, 0.028 mmol) at room temperature. The mixture was heated at 120 °C for 1 h. After cooled to room temperature, BH<sub>3</sub>·THF (0.16 mL, 0.15 mmol) was added. After stirring for 1 h, the resulting solution was concentrated under reduced pressure. The residue was purified by silica gel column chromatography (hexane/CH<sub>2</sub>Cl<sub>2</sub> = 2:1) to afford **6ae** (22 mg, 0.039 mmol, 79% yield, 89% ee) as a white powder.

### (S)-1-(Bis(3,5-dimethylphenyl)phosphino)-1-cyclohexyl-2-(diphenylphosphino)ethane borane complex (**6ae**)

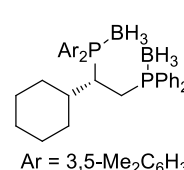

30 mg, 57% yield; White powder; HPLC analysis DAICEL Chiralcel OD-3 4.6×250 mm (hexane/*i*PrOH = 90/10, 0.8 mL/min, 220 nm, 40 °C) 5.2 (major), 5.6 (minor) min; 89% ee; Optical rotation [ $\alpha$ ]<sub>D</sub><sup>27</sup> = +49.3 (c 0.105, CHCl<sub>3</sub>); <sup>1</sup>H NMR (600 MHz, CDCl<sub>3</sub>)  $\delta$  0.34-0.51 (m, 3H), 0.69-0.80 (m, 1H), 1.02-1.11 (m, 1H), 0.70-1.30 (br, 6H), 1.23-1.57 (m, 6H), 2.20 (dddd, *J* = 15.6, 15.6, 11.4, 1.2 Hz, 1H), 2.32 (s, 6H), 2.35 (s, 6H), 2.77-2.86 (m, 1H), 3.37-3.48 (m, 1H), 7.077 (s, 1H), 7.083 (s, 1H), 7.14 (ddd, *J* = 10.8, 8.4, 1.2 Hz, 2H), 7.25 (ddd, *J* = 7.8, 7.8, 2.4 Hz, 2H), 7.33-7.38 (m, 1H), 7.41 (d, *J* = 10.8 Hz, 2H), 7.47-7.51 (m, 2H), 7.52-7.54 (m, 1H), 7.54 (d, *J* = 10.8 Hz, 2H), 7.81 (ddd, *J* = 10.8, 8.4, 1.2 Hz, 2H); <sup>13</sup>C NMR (150 MHz, CDCl<sub>3</sub>)  $\delta$  21.3, 21.4, 23.9 (dd, *J* = 31.5, 5.7 Hz), 25.7, 26.6 (2C), 30.9, 31.9 (d, *J* = 8.7 Hz), 34.8 (d, *J* = 31.5 Hz), 38.9, 128.6 (d, *J* = 10.1 Hz), 128.77 (d, *J* = 51.2 Hz), 128.80 (d, *J* = 10.1 Hz), 128.88 (d, *J* = 53.1 Hz), 128.95 (d, *J* = 51.8 Hz), 130.2 (d, *J* = 8.6 Hz), 130.4 (d, *J* = 8.6 Hz), 130.6, 131.1 (d, *J* = 57.5 Hz), 131.2 (d, *J* = 8.6 Hz), 131.7, 132.9, 133.1, 133.2 (d, *J* = 8.6 Hz), 138.2 (d, *J* = 10.1 Hz), 138.6 (d, *J* = 10.1 Hz); <sup>31</sup>P NMR (243 MHz, CDCl<sub>3</sub>)  $\delta$  20.2, 22.9; IR (ATR): 3412, 3055, 3006, 2924, 2853, 2384, 2346, 2256, 1602, 1589, 1482, 1450, 1437, 1130, 1107, 1058, 1030, 996, 849, 823, 751, 737, 693 cm<sup>-1</sup>; HRMS (ESI) Calcd for C<sub>36</sub>H<sub>48</sub>B<sub>2</sub>P<sub>2</sub> [M+Na]<sup>+</sup> 587.3310, Found 587.3310; mp. 171.0-174.0 °C.

### Transformation of 6ae into 5ae (Scheme S3)

Scheme S3

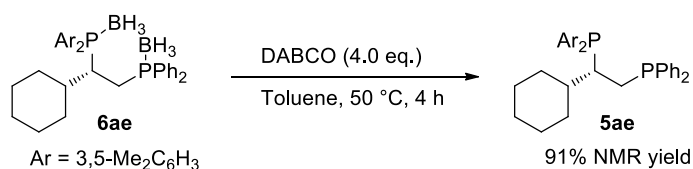

A solution of **6ae** (28 mg, 0.050 mmol) in toluene (1.0 mL) and DABCO (22 mg, 0.20 mmol) was heated at 50 °C for 4 h. After cooled to room temperature, the resulting mixture was passed through a short pad of florisil<sup>®</sup> with toluene as an eluent under nitrogen stream, and the following evaporation provided **5ae** in 91% NMR yield



(trimethyl phosphate was used as an internal standard) as a white solid.

**(S)-1-(Bis(3,5-dimethylphenyl)phosphino)-1-cyclohexyl-2-(diphenylphosphino)ethane (5ae)**

91% NMR yield; White solid;  $^1\text{H}$  NMR (600 MHz,  $\text{CDCl}_3$ )  $\delta$  1.02-1.17 (m, 3H), 1.29-1.39 (m, 1H), 1.52-1.73 (m, 6H), 1.79-1.89 (m, 1H), 2.01-2.15 (m, 2H), 2.22 (s, 6H), 2.25 (s, 6H), 2.23-2.30 (m, 1H), 6.89 (s, 1H), 6.93 (s, 1H), 6.95 (d,  $J = 7.2$  Hz, 2H), 7.02 (d,  $J = 7.8$  Hz, 2H), 7.20 (ddd,  $J = 7.2, 6.6, 1.2$  Hz, 2H), 7.24-7.28 (m, 7H), 7.32 (td,  $J = 7.8, 1.2$  Hz, 1H);  $^{13}\text{C}$  NMR (150 MHz,  $\text{CDCl}_3$ )  $\delta$  21.3, 26.5, 26.8, 27.1, 28.1 (dd,  $J = 14.0, 14.0$  Hz), 30.9 (d,  $J = 8.6$  Hz), 32.0 (dd,  $J = 10.1, 4.2$  Hz), 38.1 (dd,  $J = 17.3, 10.1$  Hz), 40.3 (dd,  $J = 14.4, 5.9$  Hz), 128.1, 128.2 (d,  $J = 5.7$  Hz), 128.3 (d,  $J = 7.1$  Hz), 128.6, 130.1, 130.6, 130.8 (d,  $J = 18.8$  Hz), 132.3 (d,  $J = 17.3$  Hz), 132.5 (d,  $J = 21.6$  Hz), 133.4 (d,  $J = 18.6$  Hz), 137.0 (d,  $J = 14.4$  Hz), 137.39 (d,  $J = 17.2$  Hz), 137.43 (d,  $J = 15.9$  Hz), 137.7 (d,  $J = 12.9$  Hz), 138.4 (d,  $J = 14.4$  Hz), 139.8 (d,  $J = 14.1$  Hz);  $^{31}\text{P}$  NMR (243 MHz,  $\text{CDCl}_3$ )  $\delta$  -4.7 (d,  $J = 16.3$  Hz), -17.1 (d,  $J = 16.3$  Hz).

## 4. References

1. A. Kondoh, S. Ishikawa and M. Terada, *J. Am. Chem. Soc.*, 2020, **142**, 3724–3728
2. V. Hornillos, C. Vila, E. Otten and B. L. Feringa, *Angew. Chem., Int. Ed.*, 2015, **54**, 7867-7871.
3. M. Jin and M. Nakamura, *Chem. Lett.*, 2013, **42**, 1035-1037
4. A. Allen, Jr., L. Ma and W. Lin, *Tetrahedron Lett.*, 2002, **43**, 3707-3710.

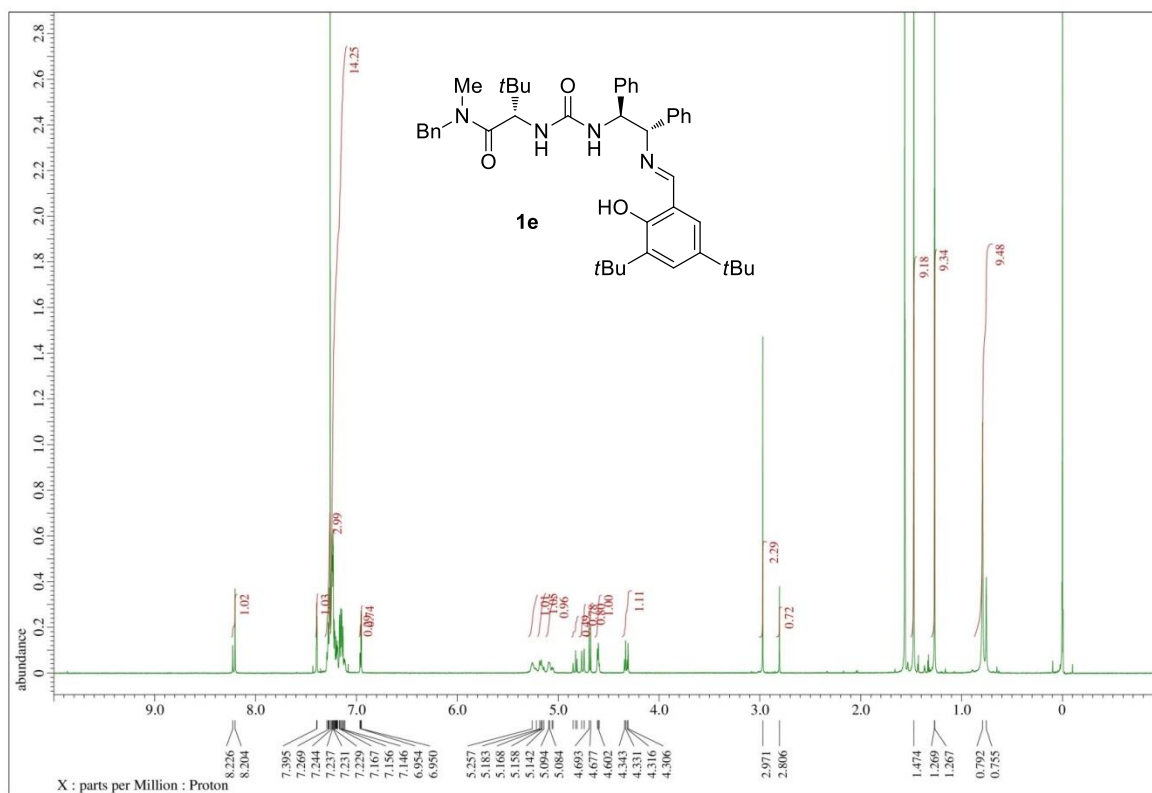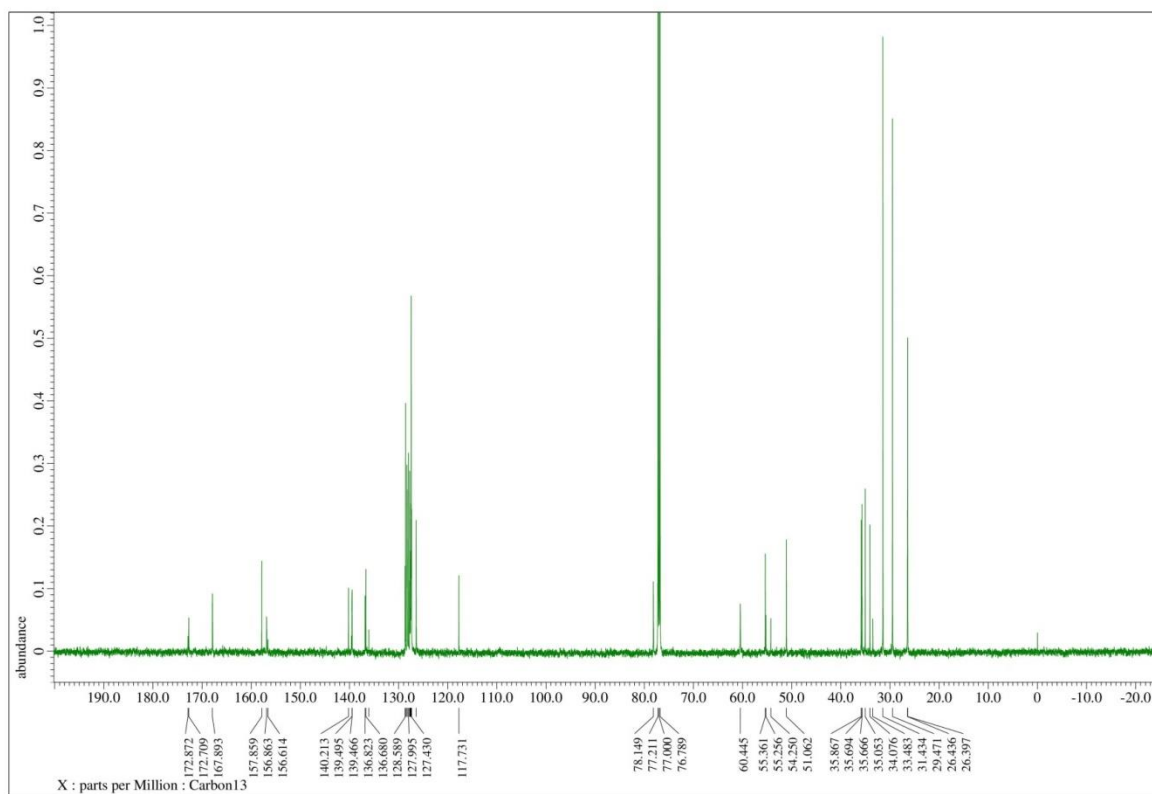

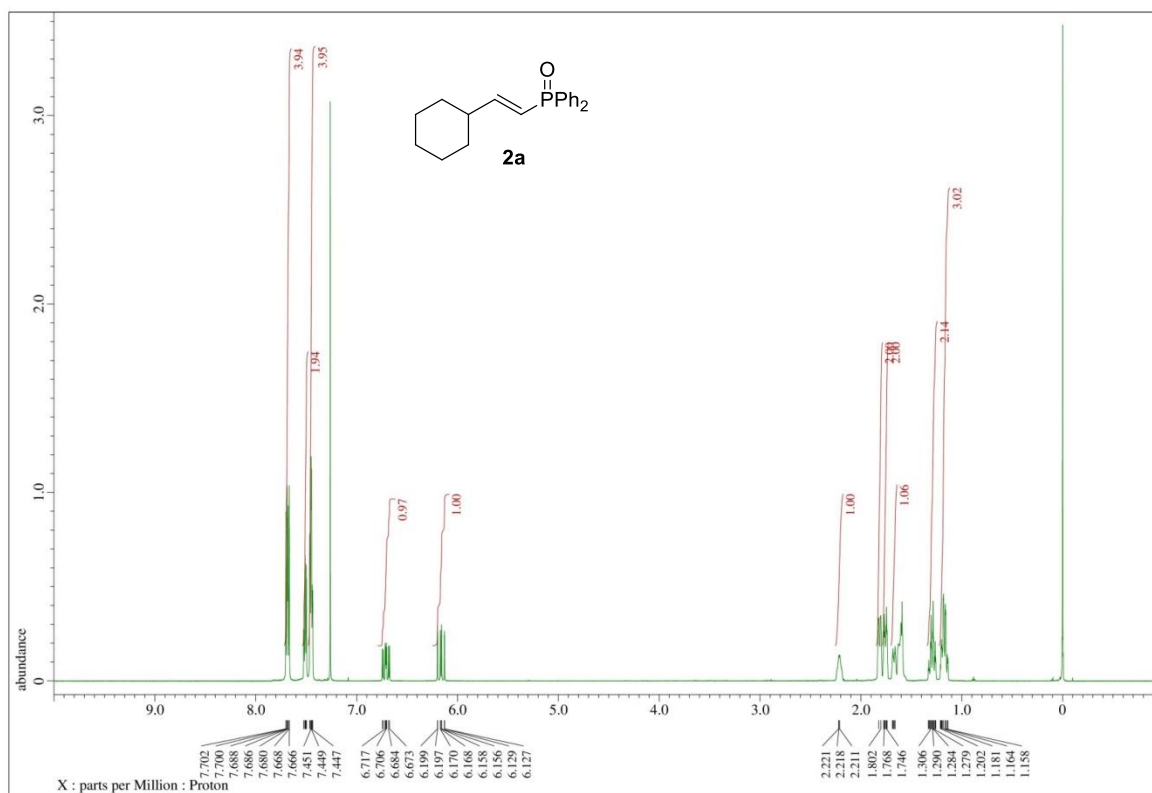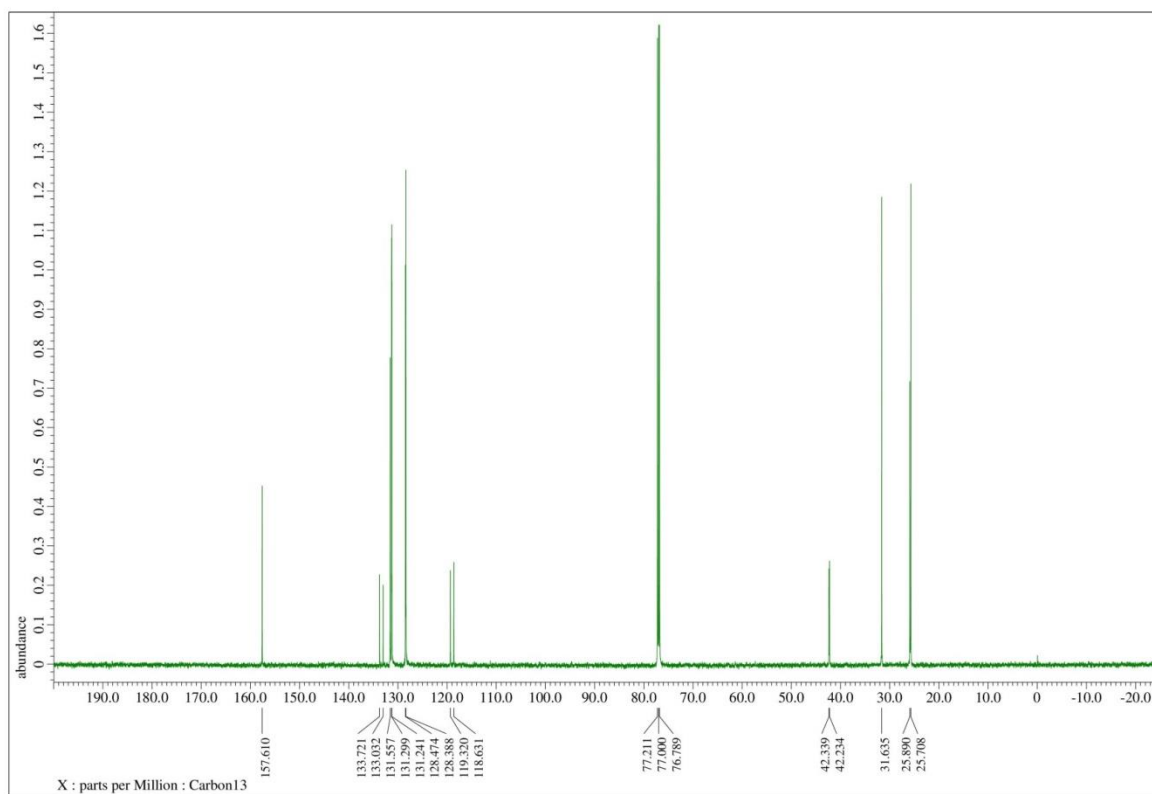

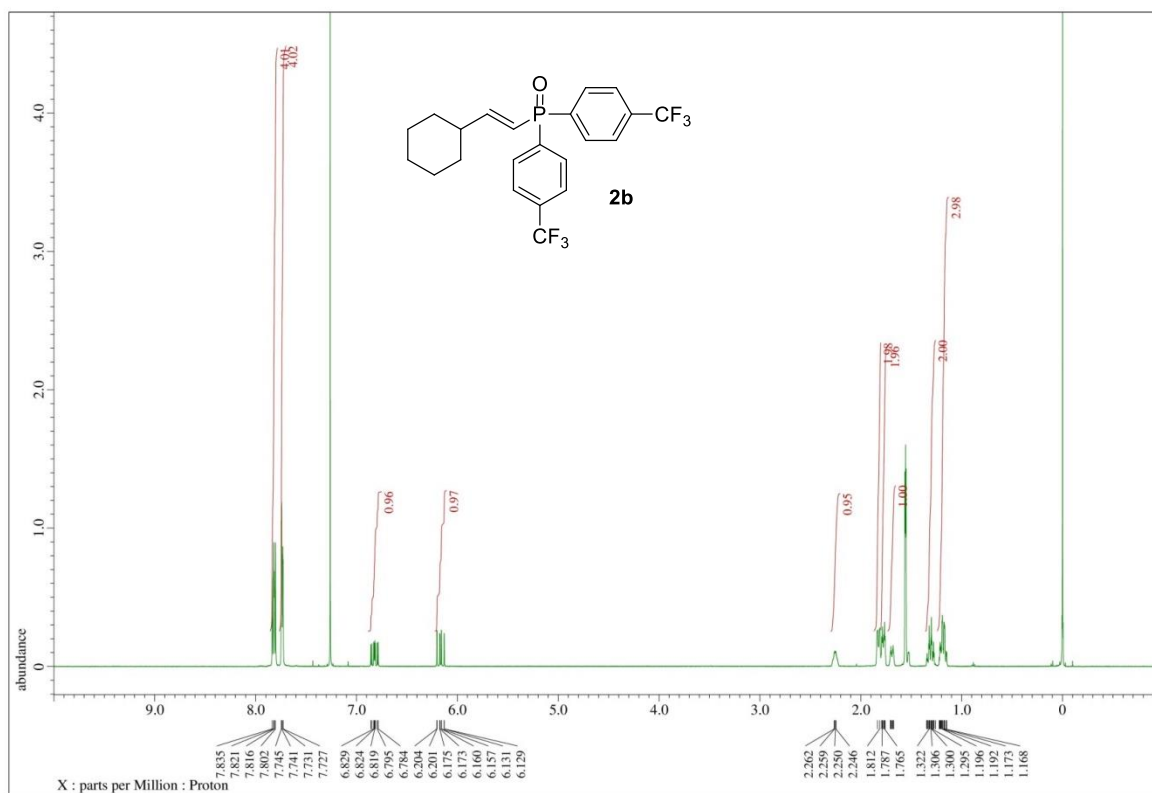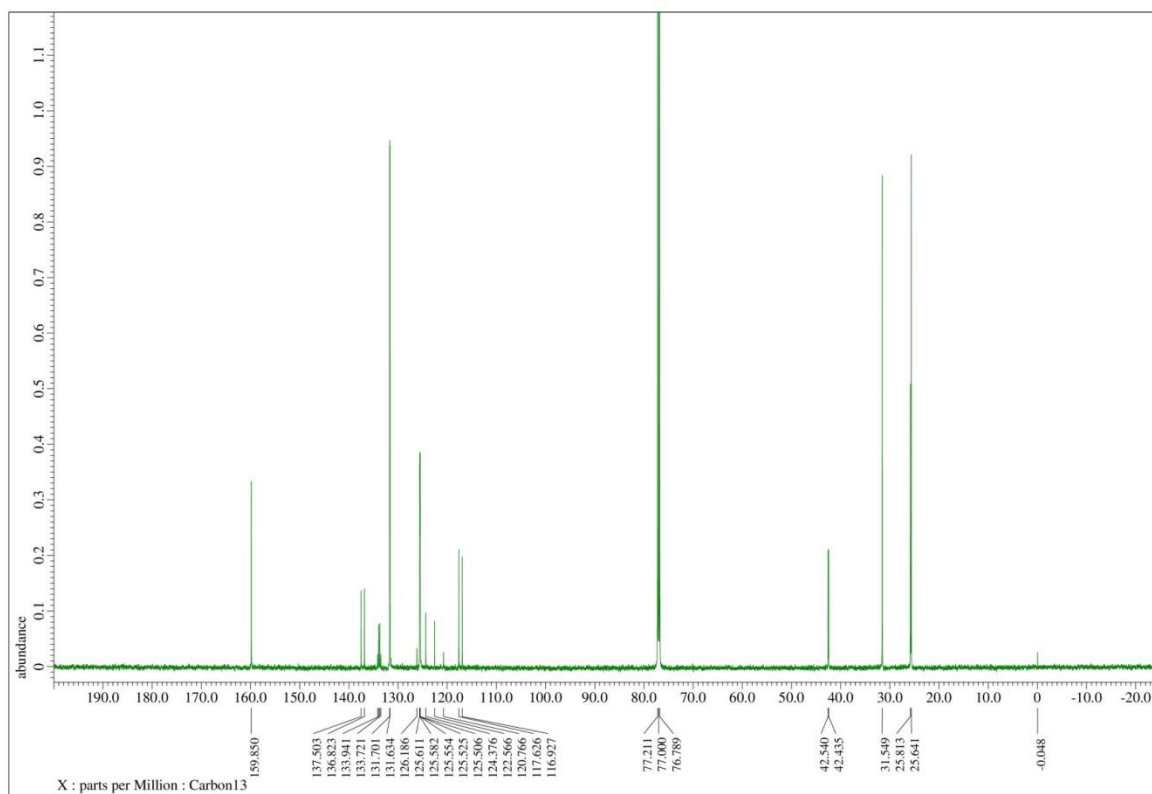

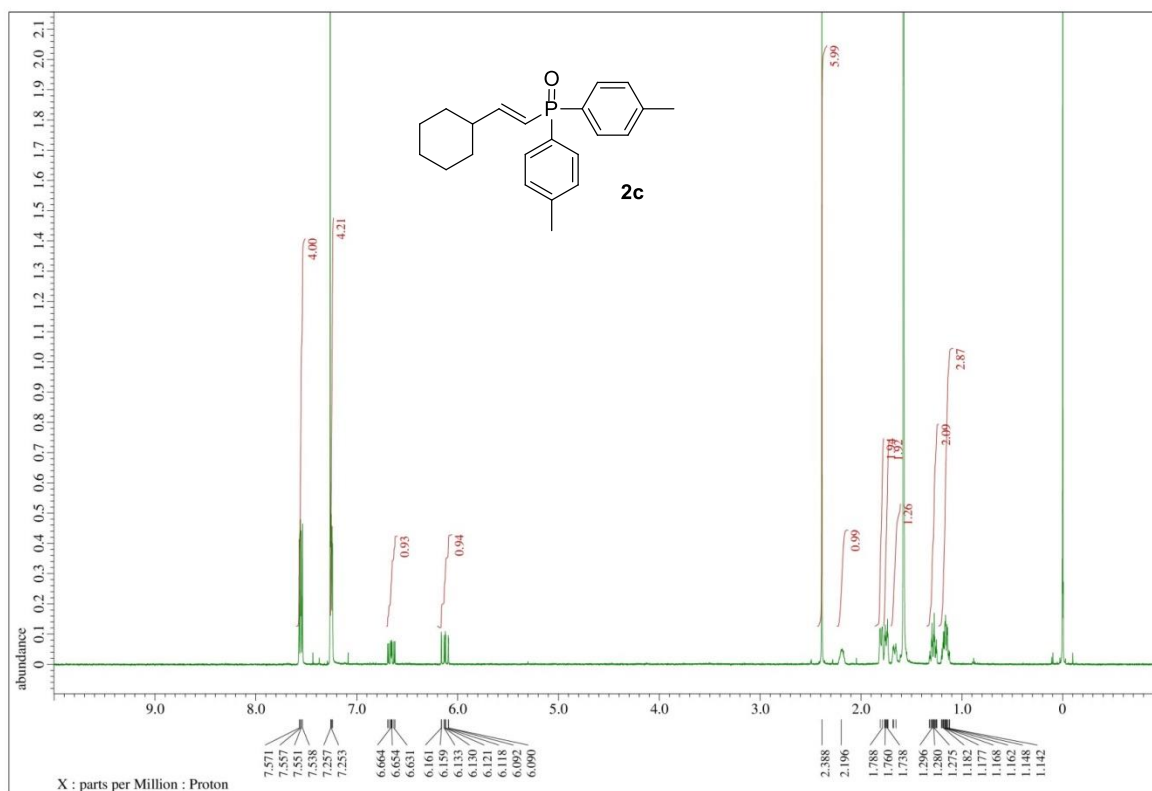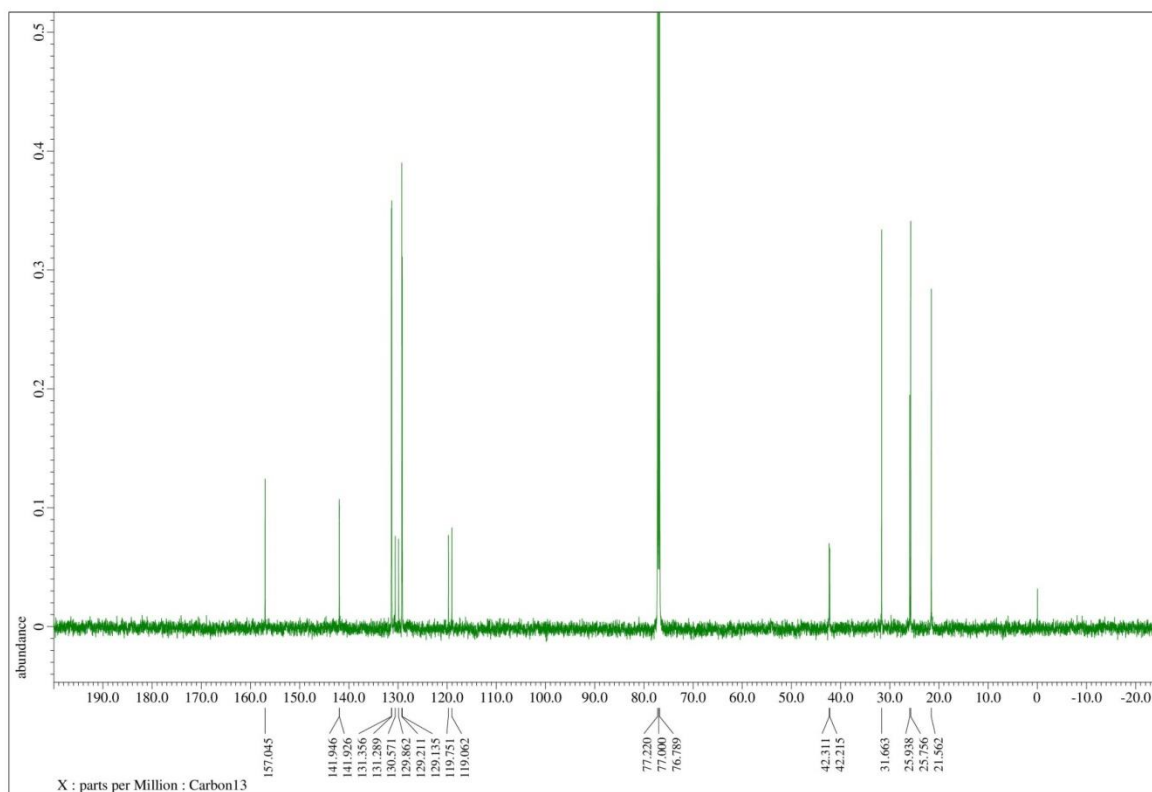

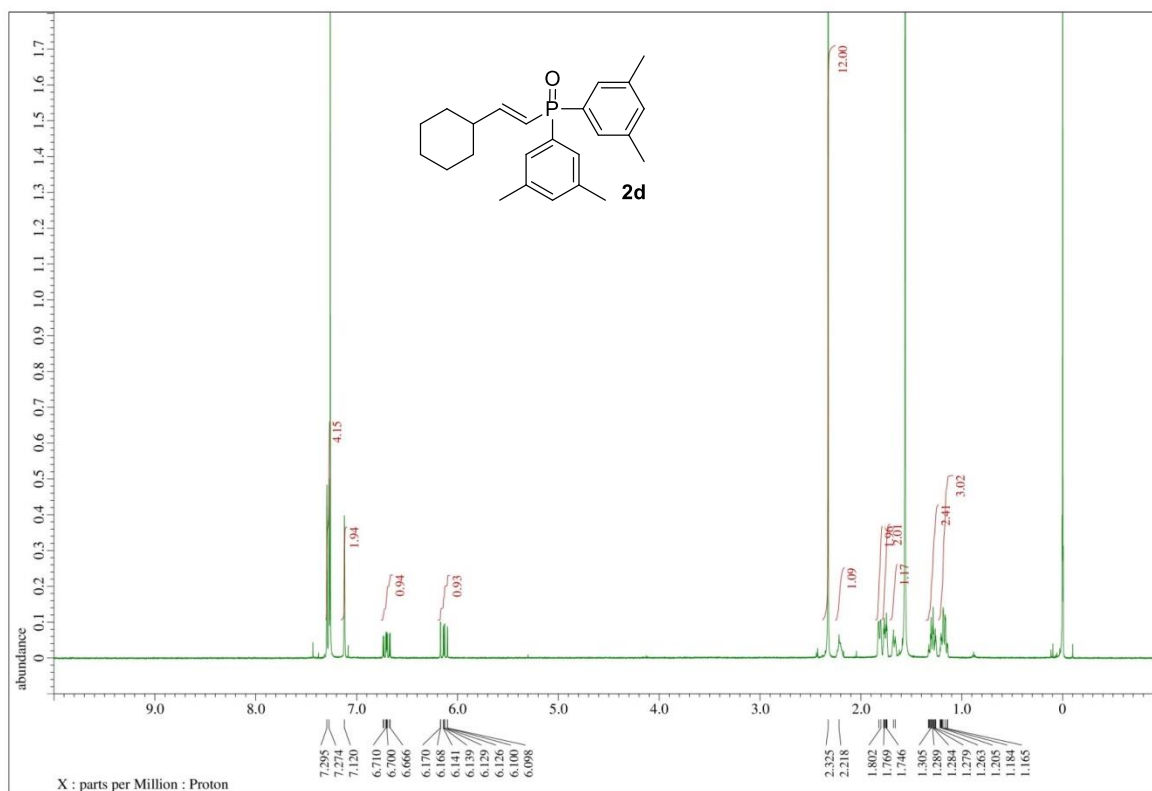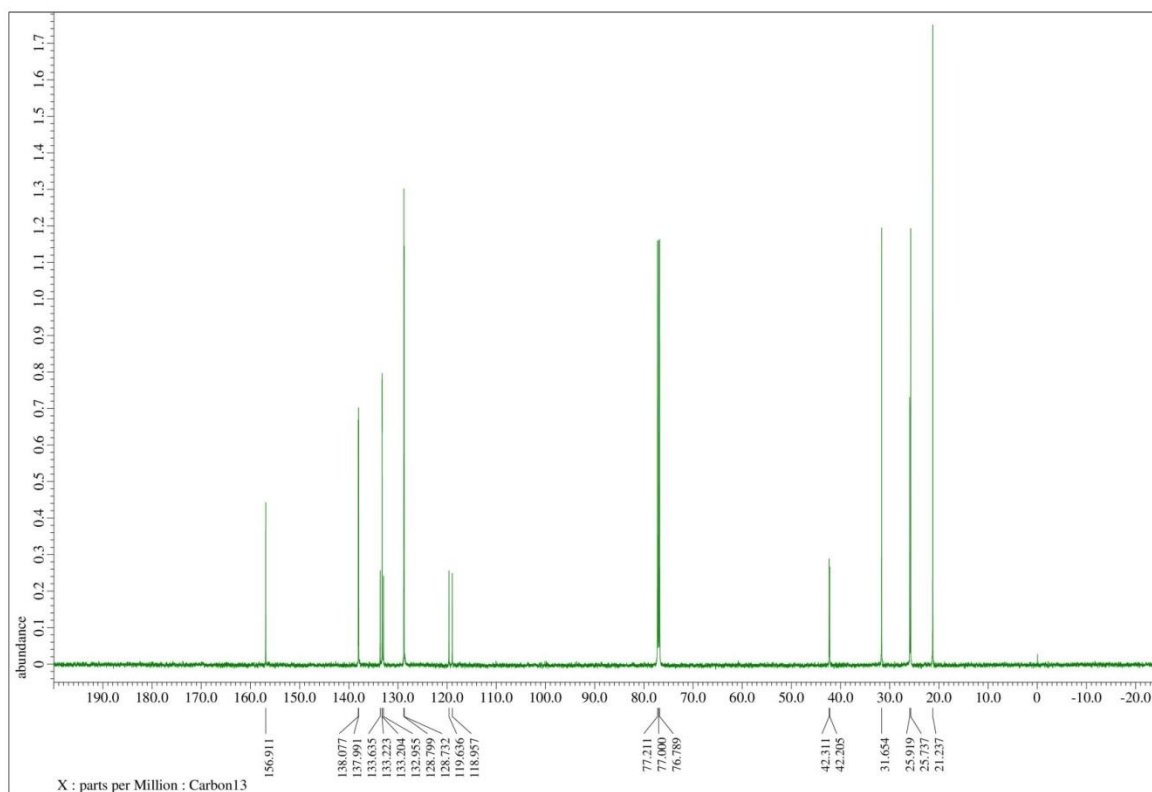

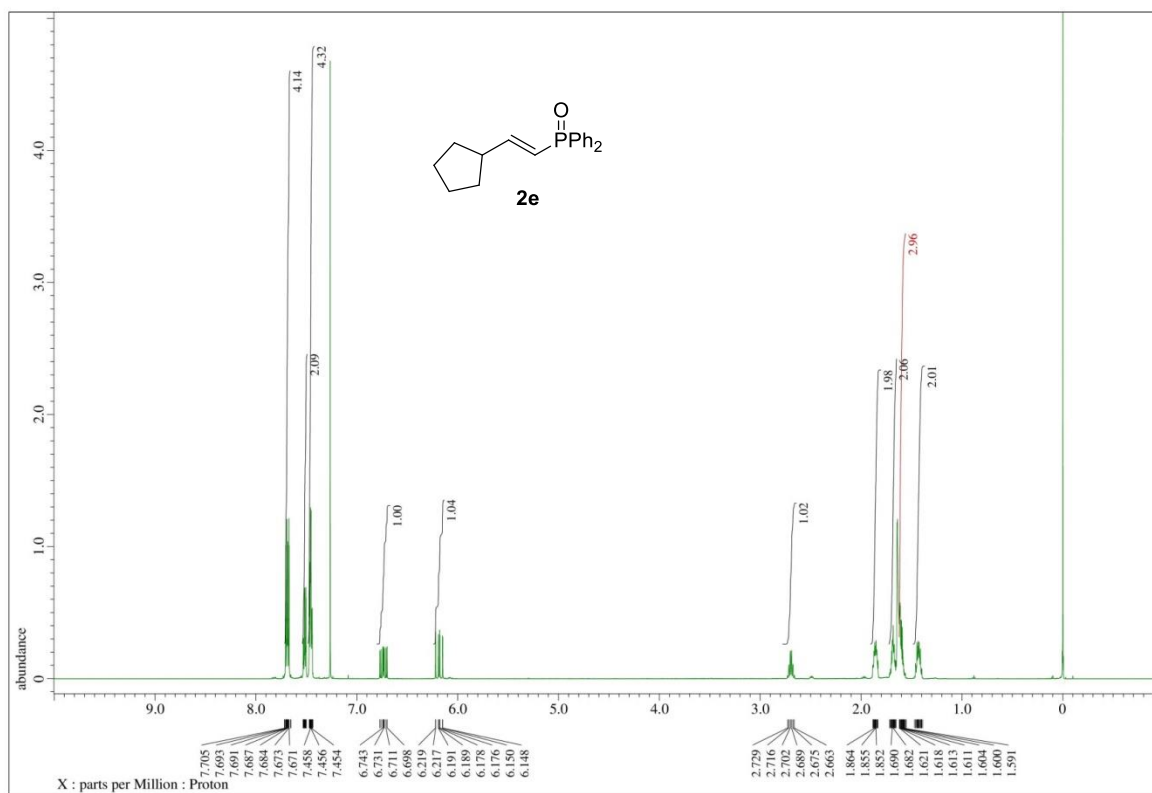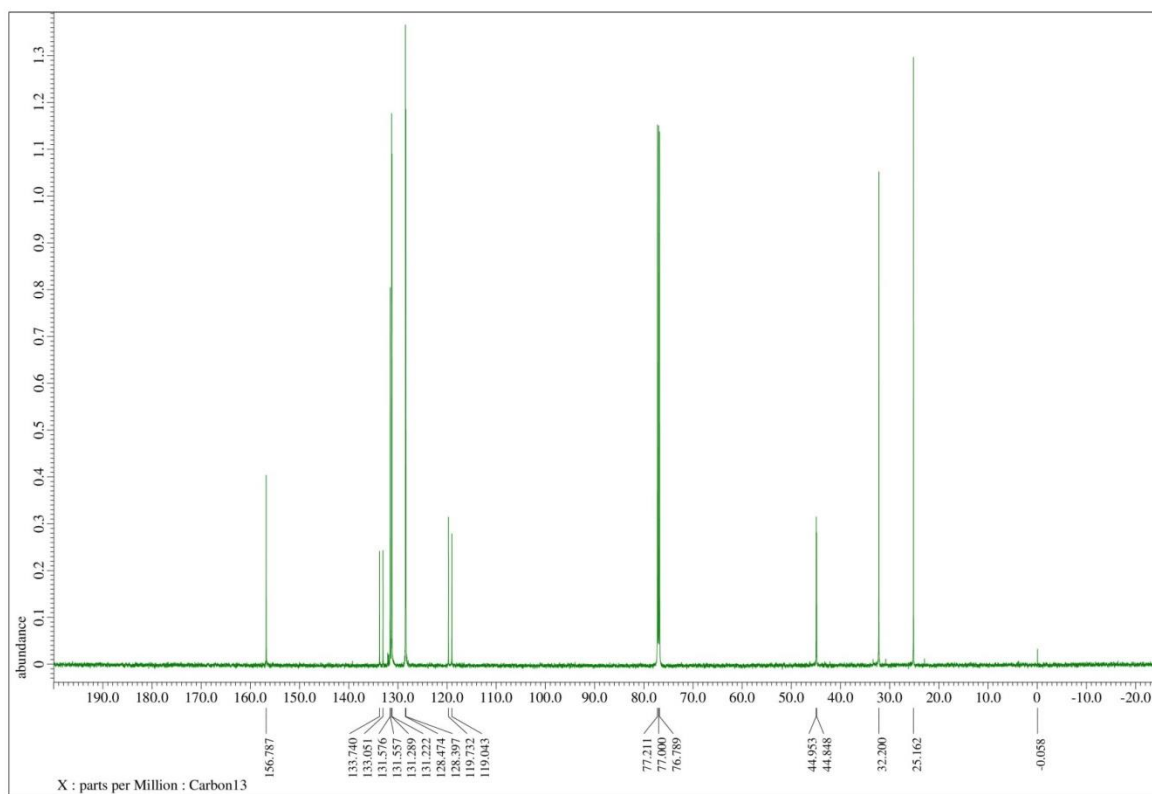

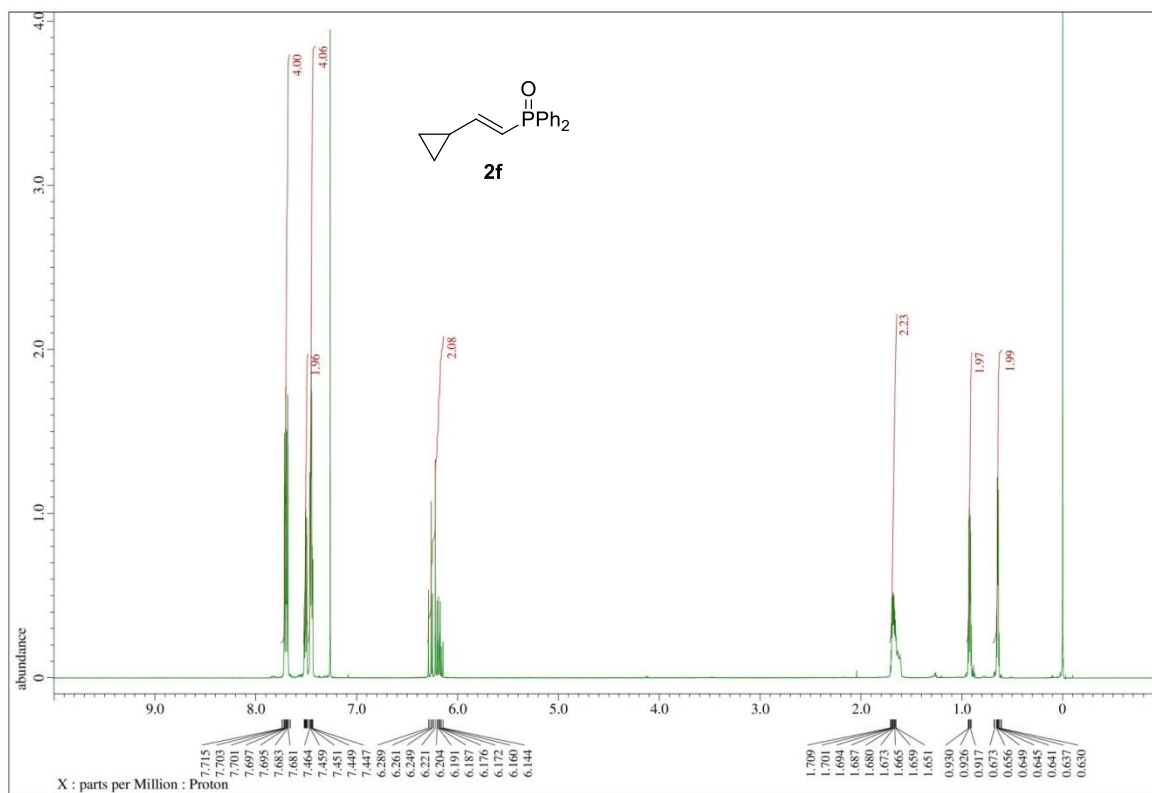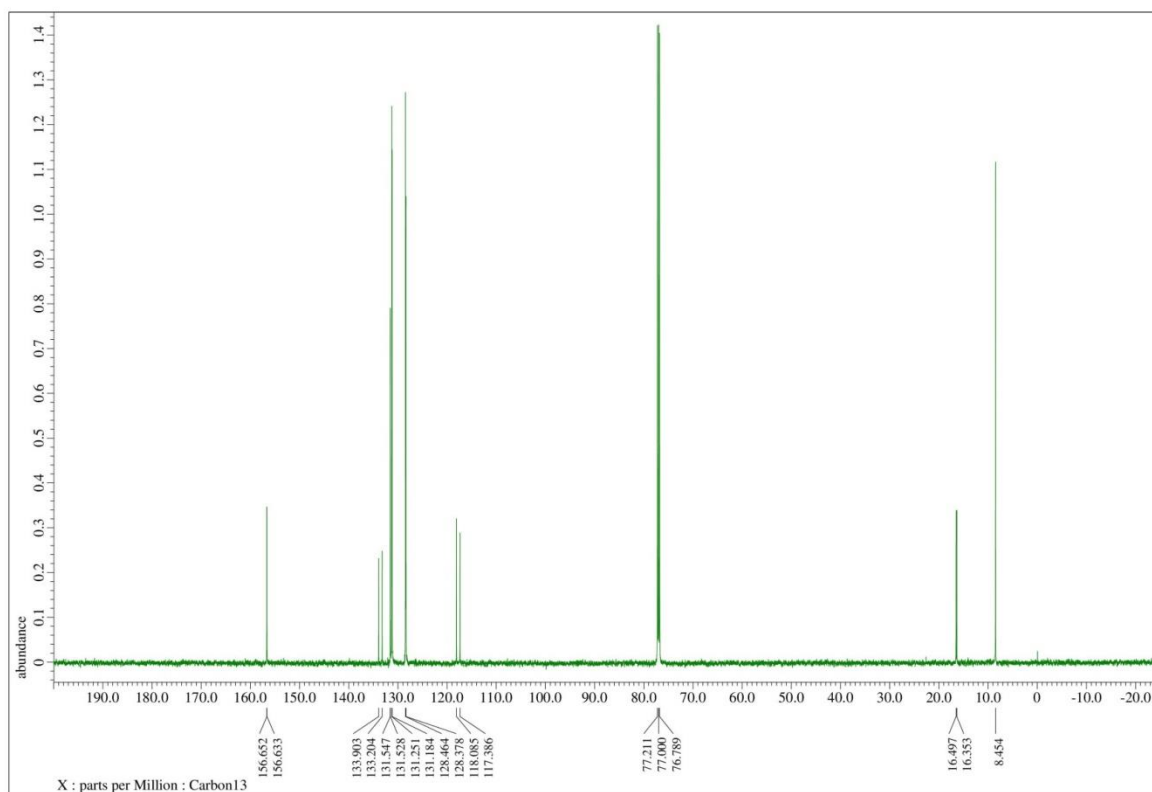



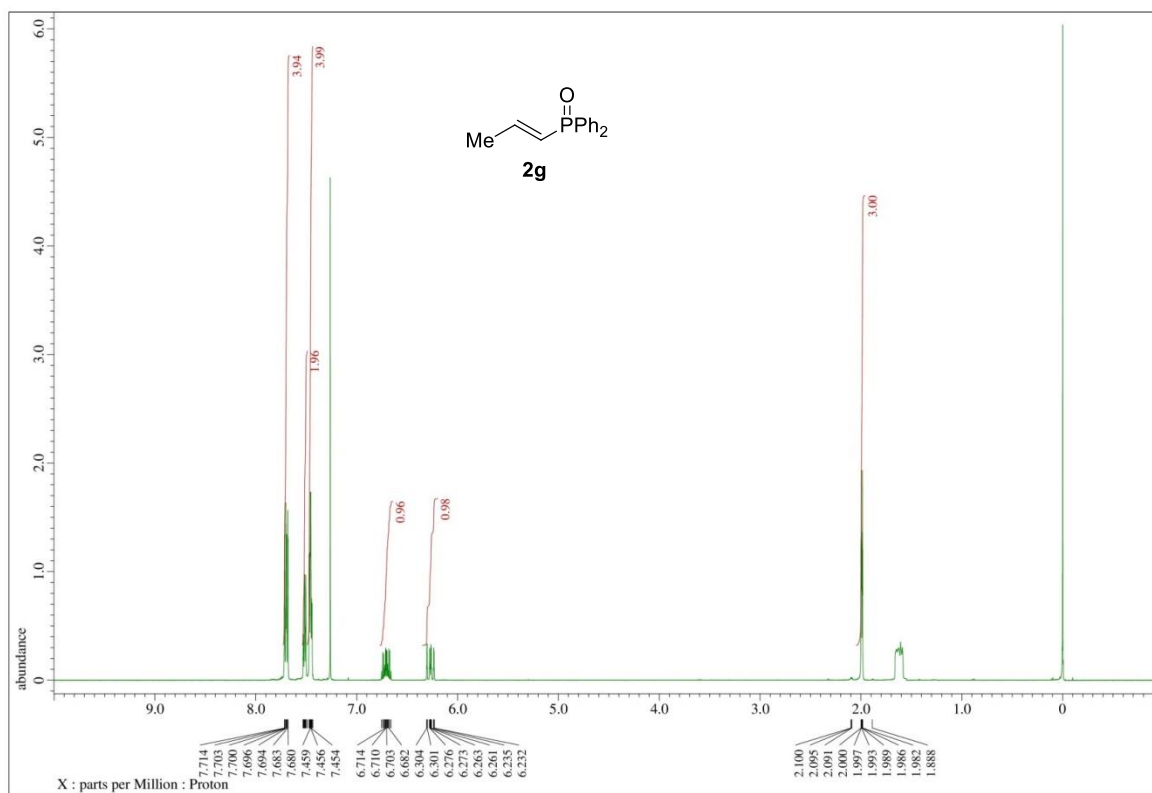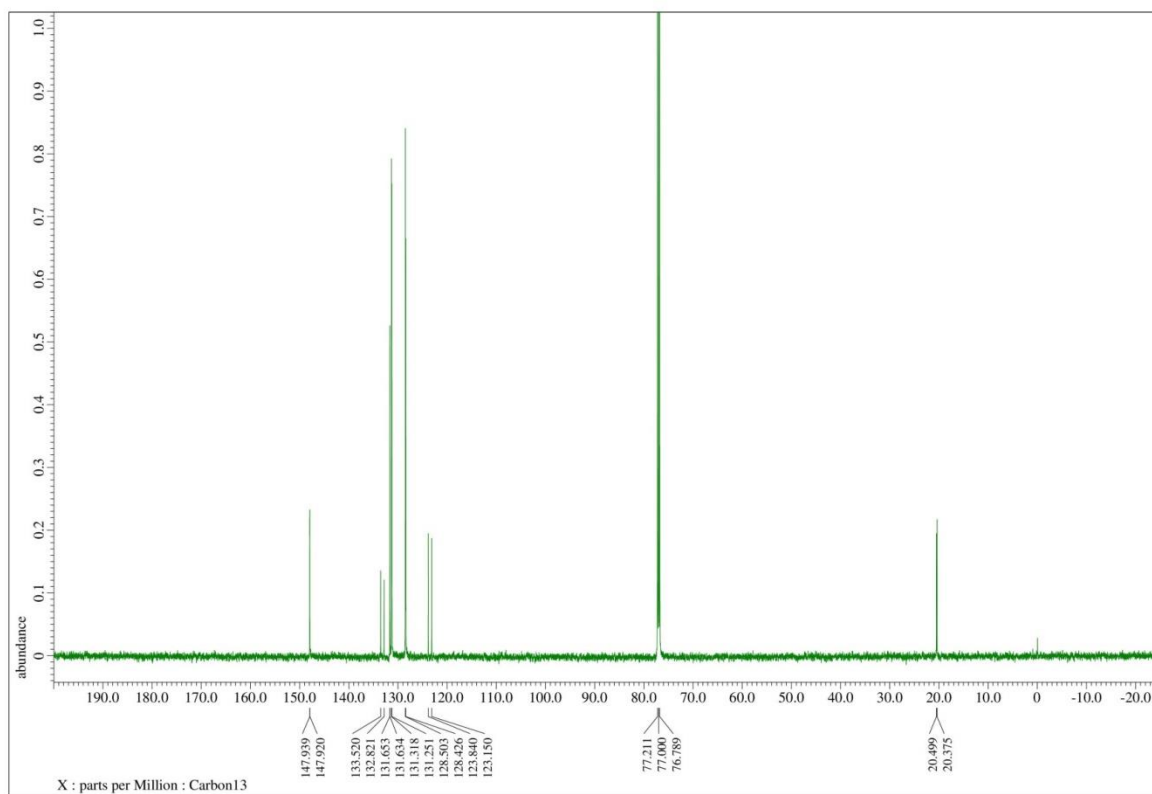

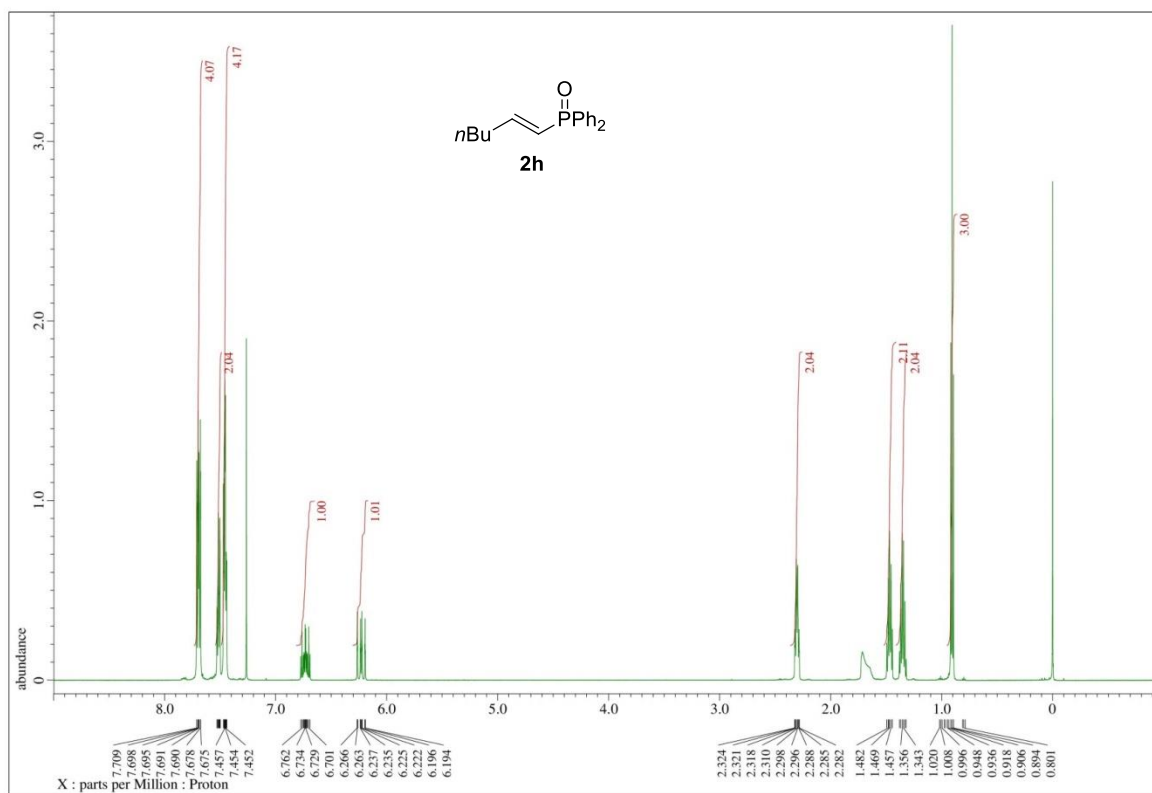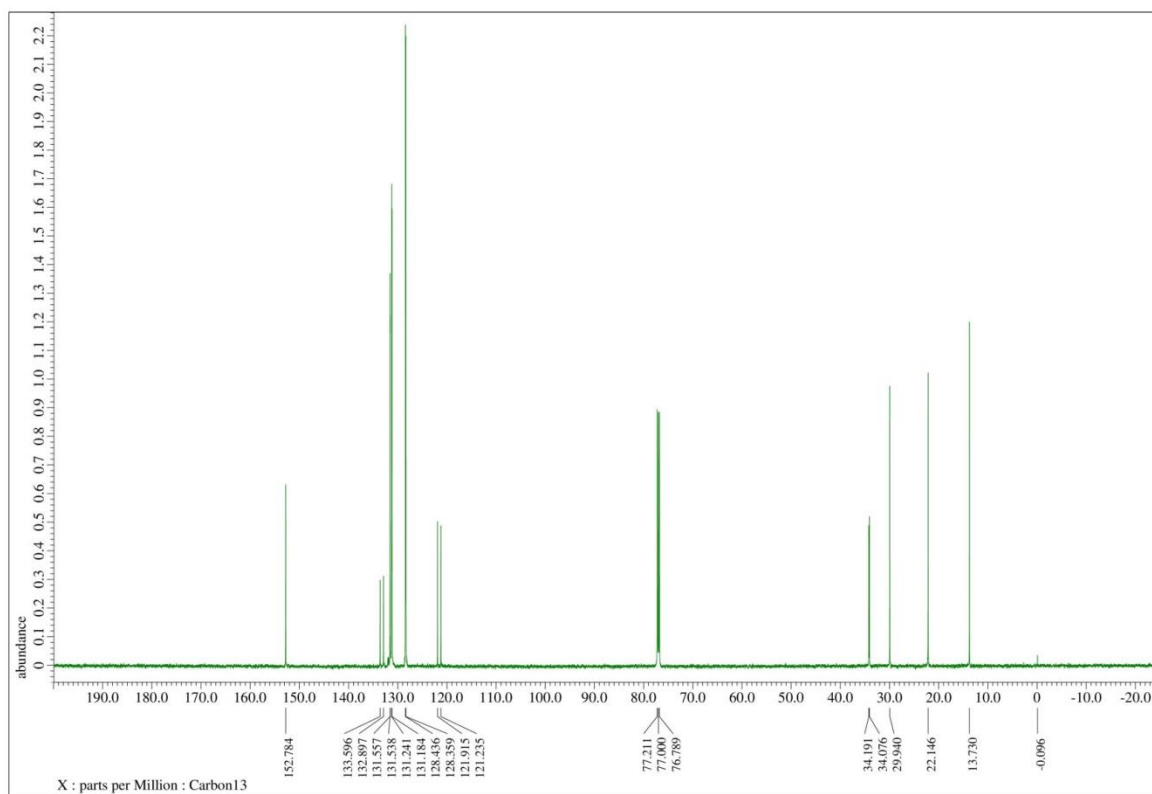

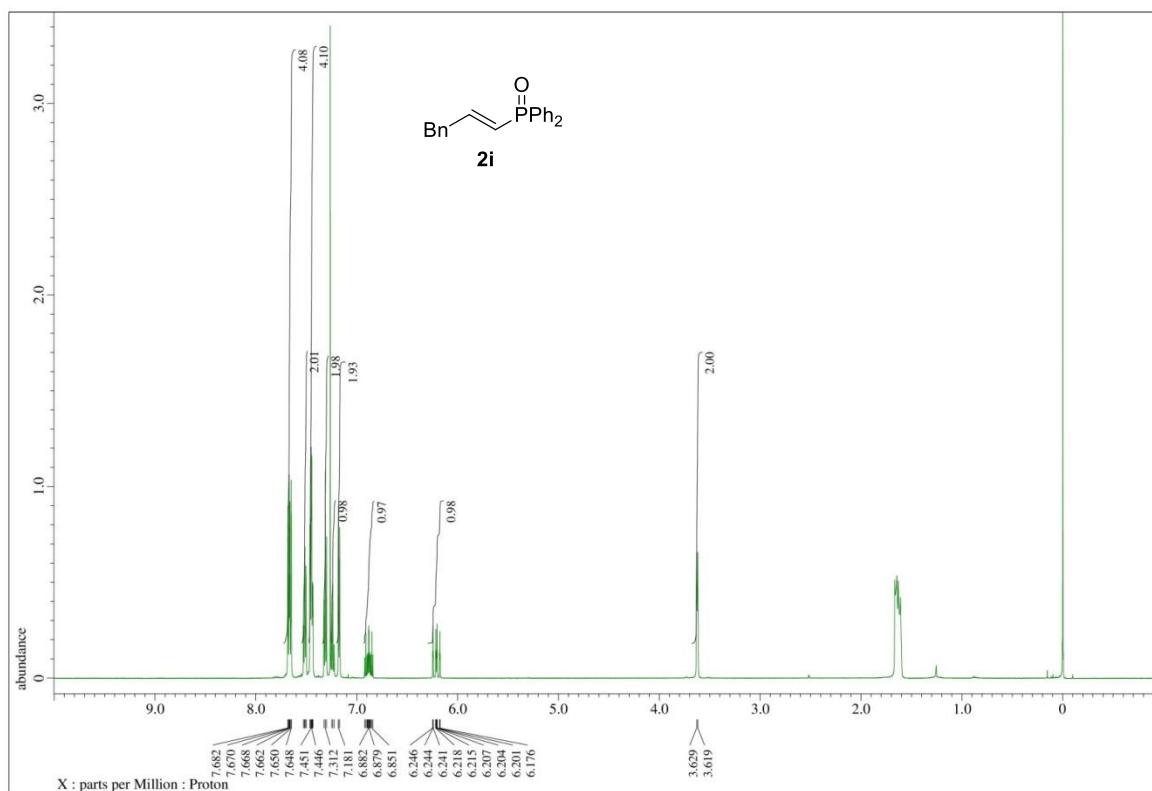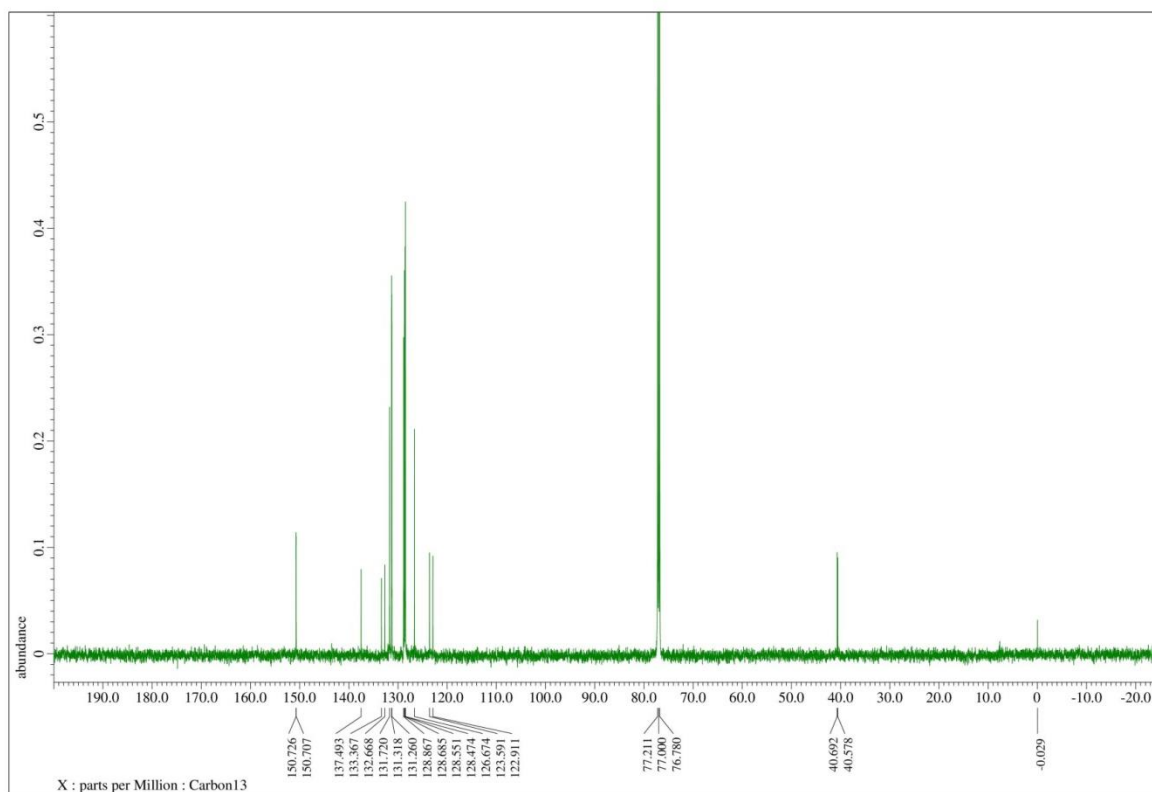

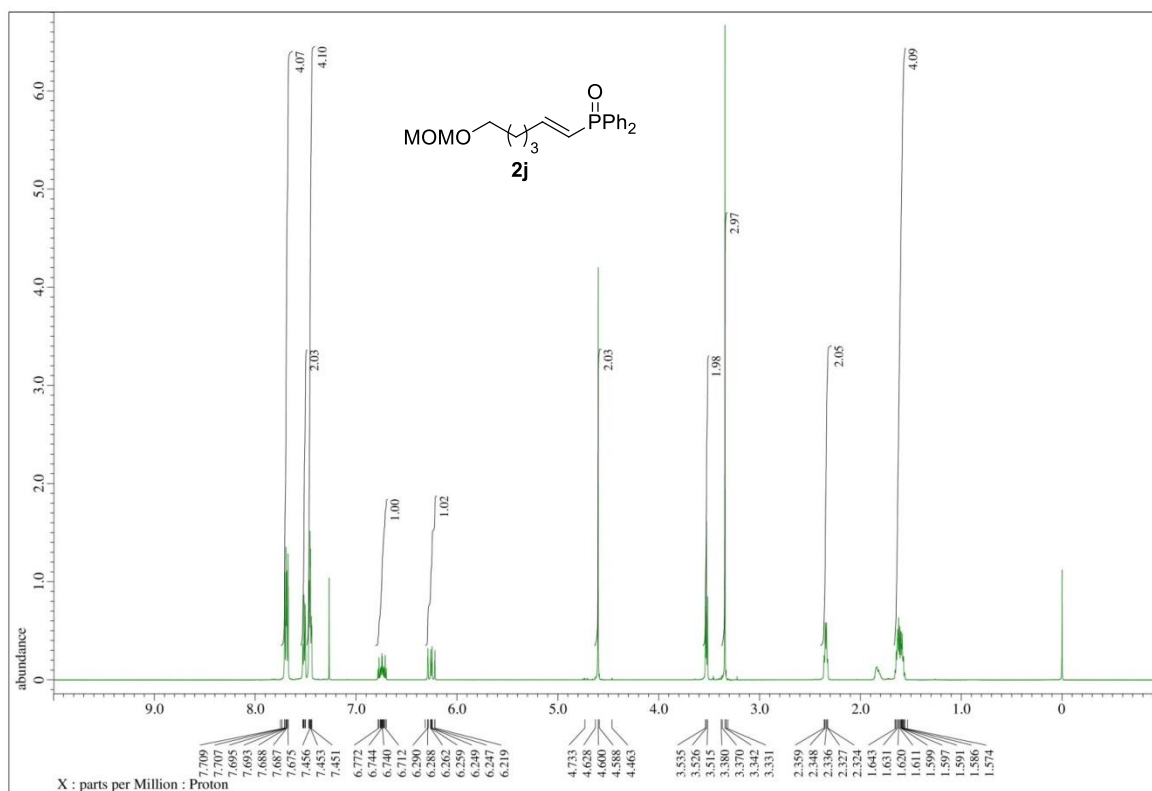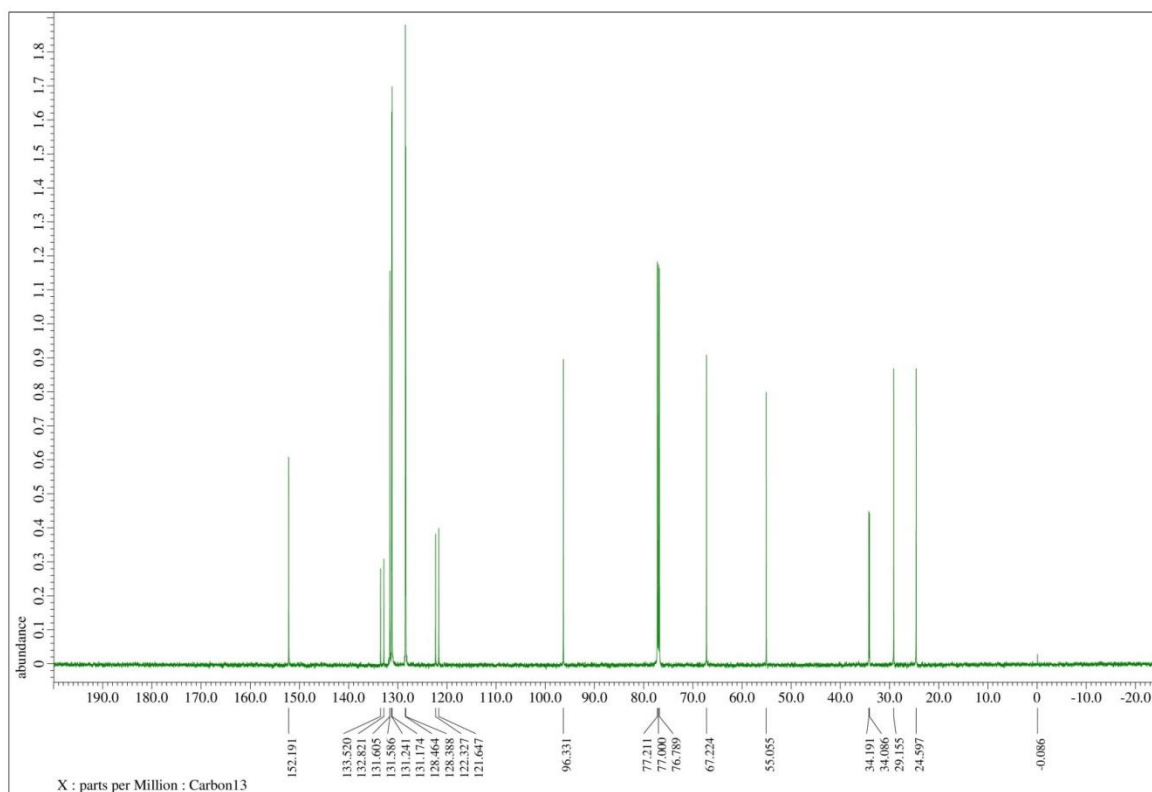

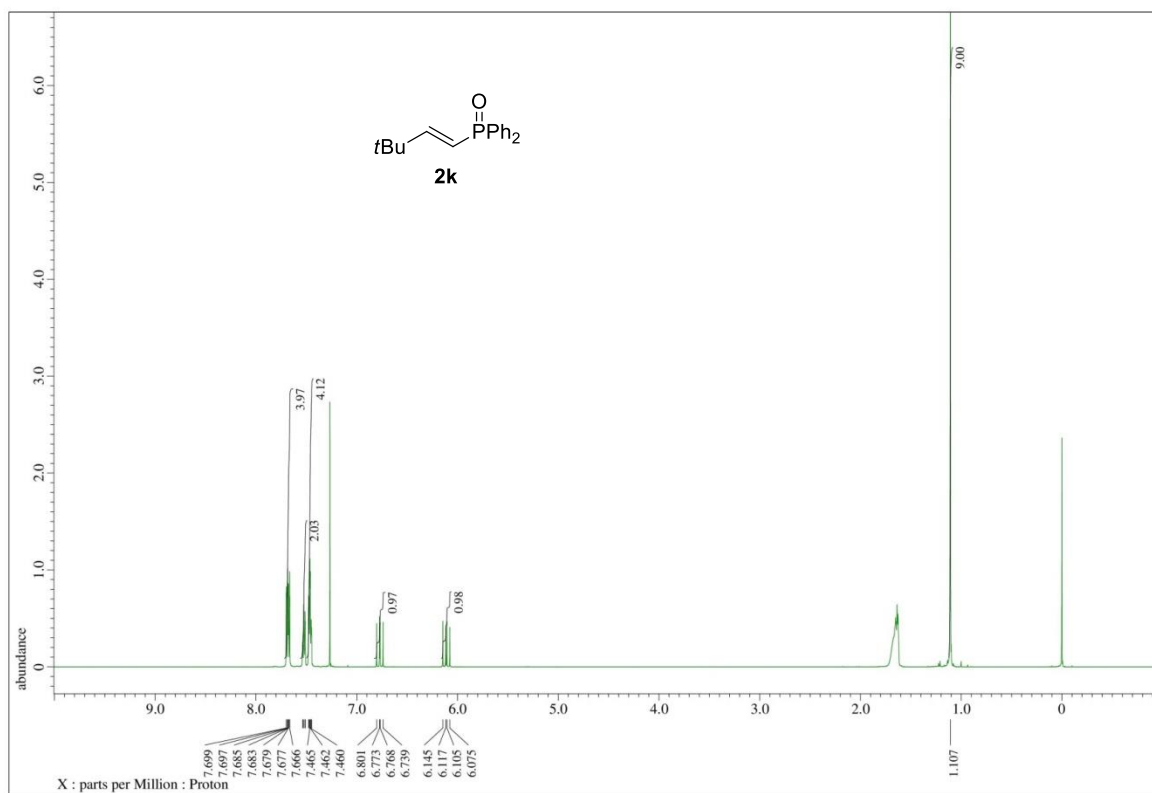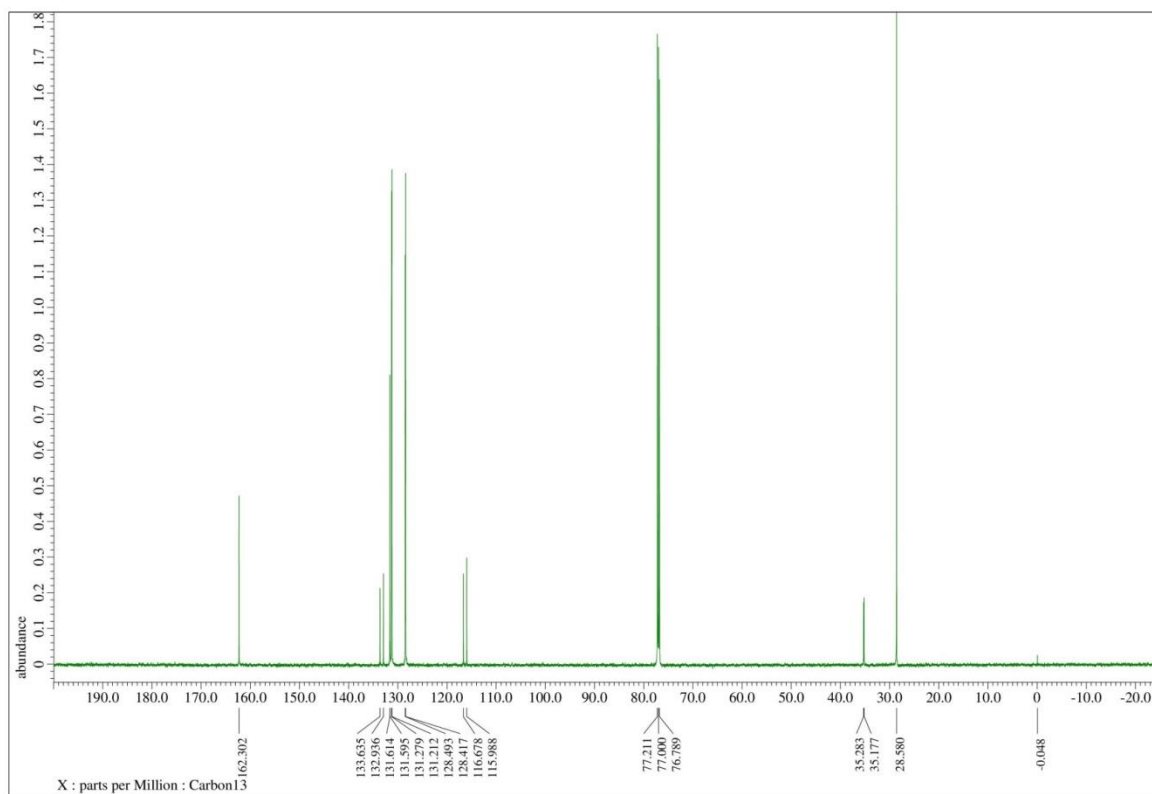

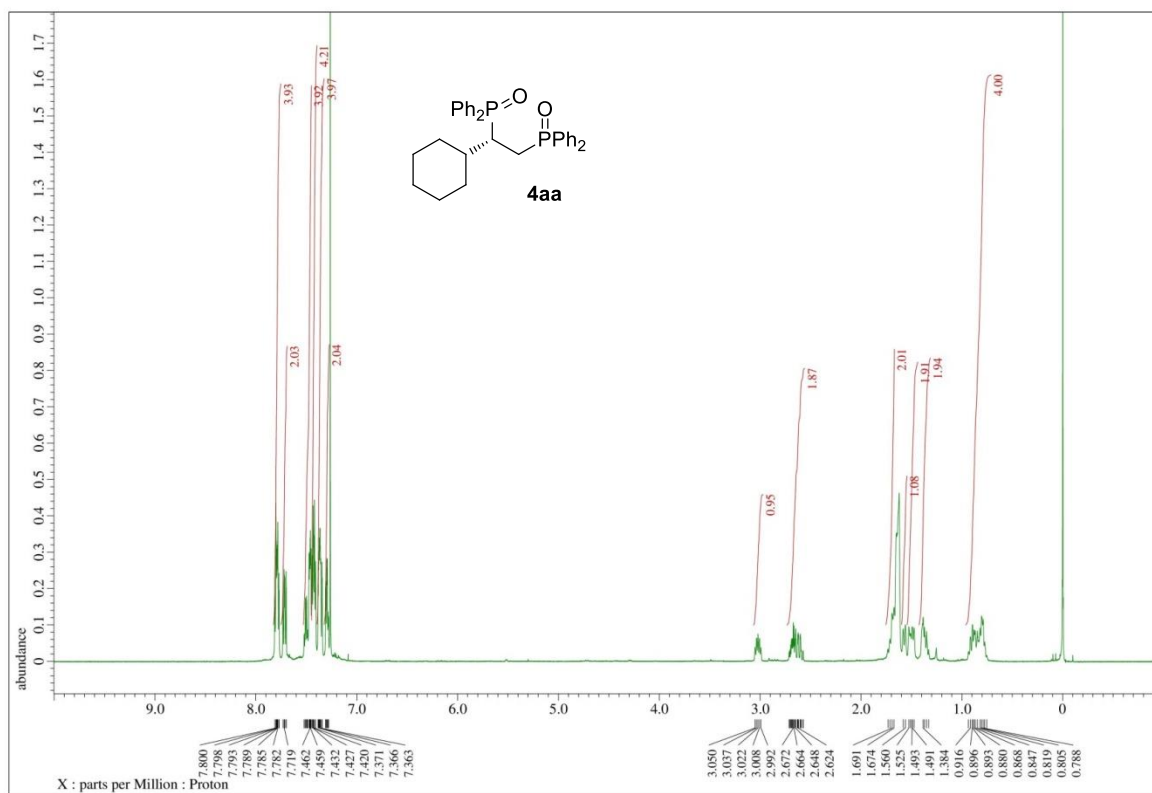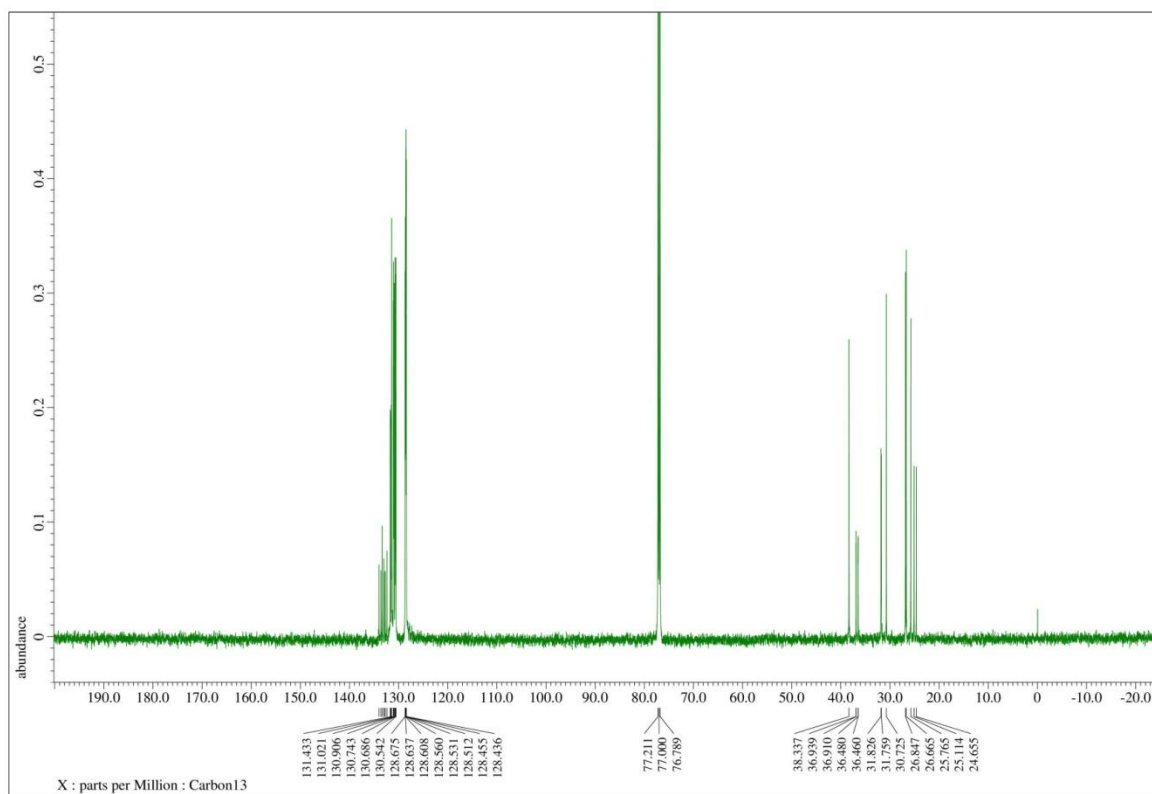

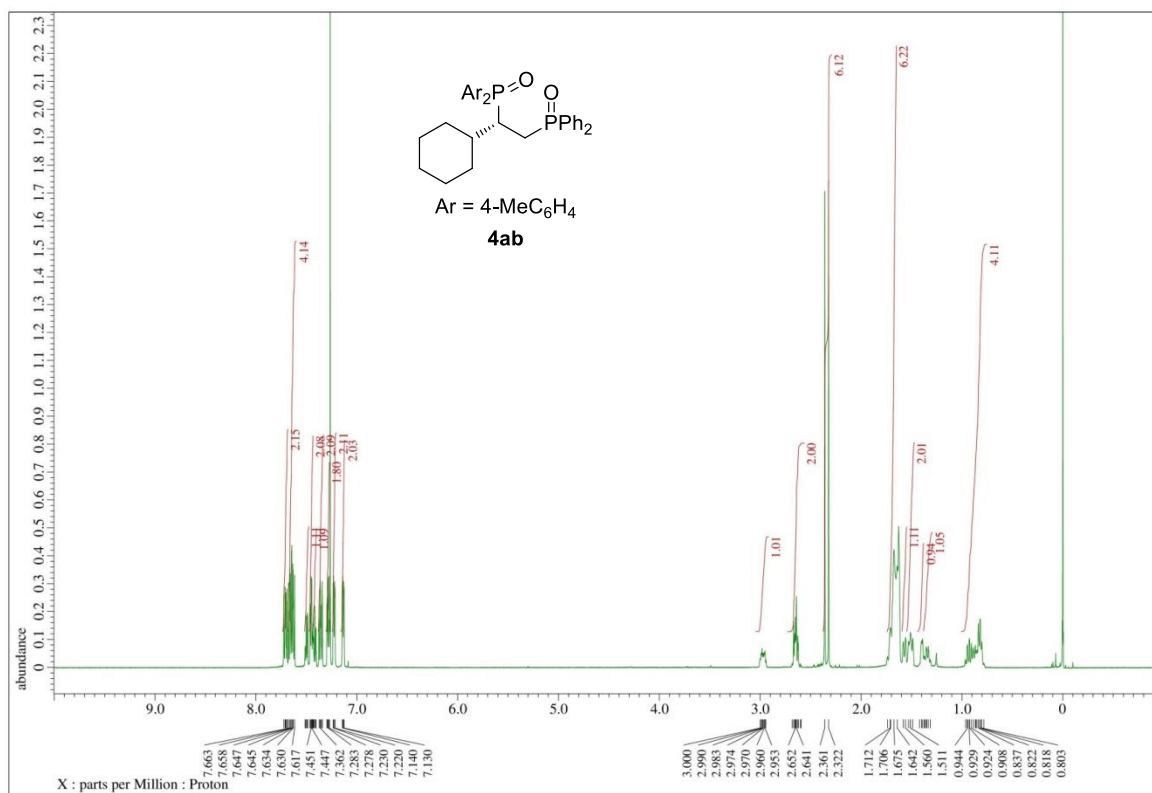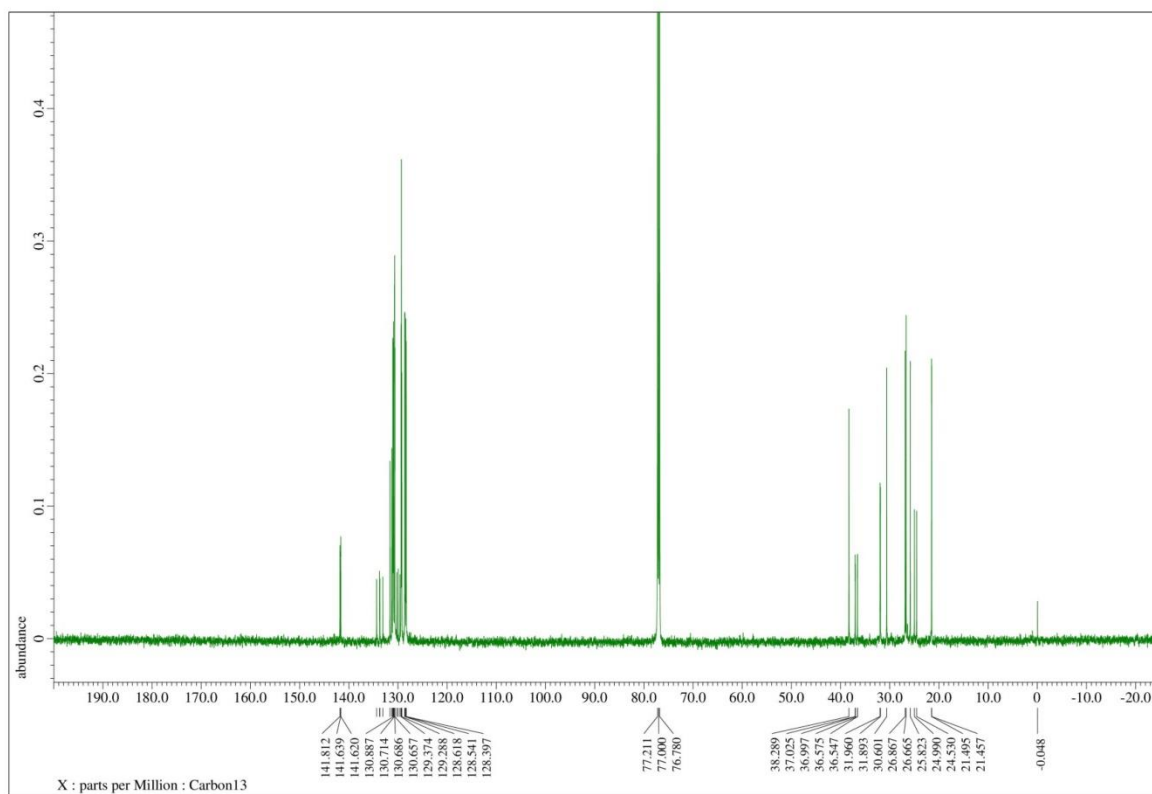

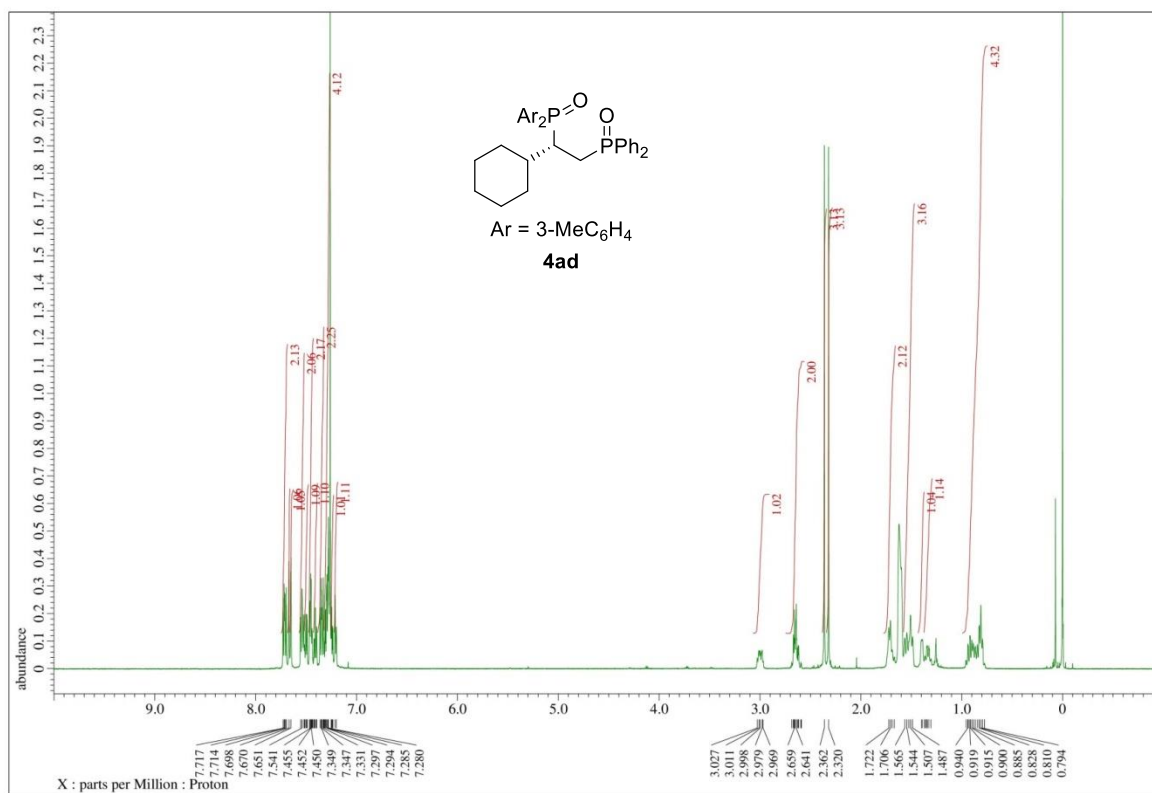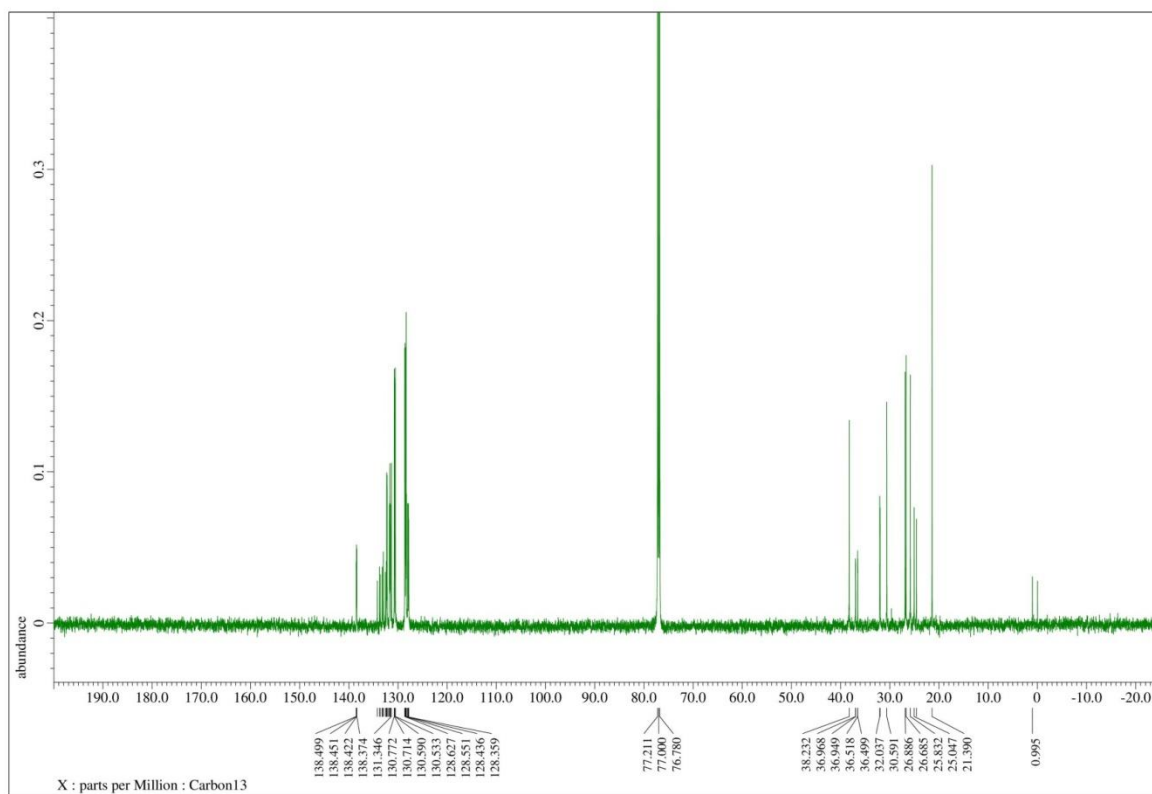



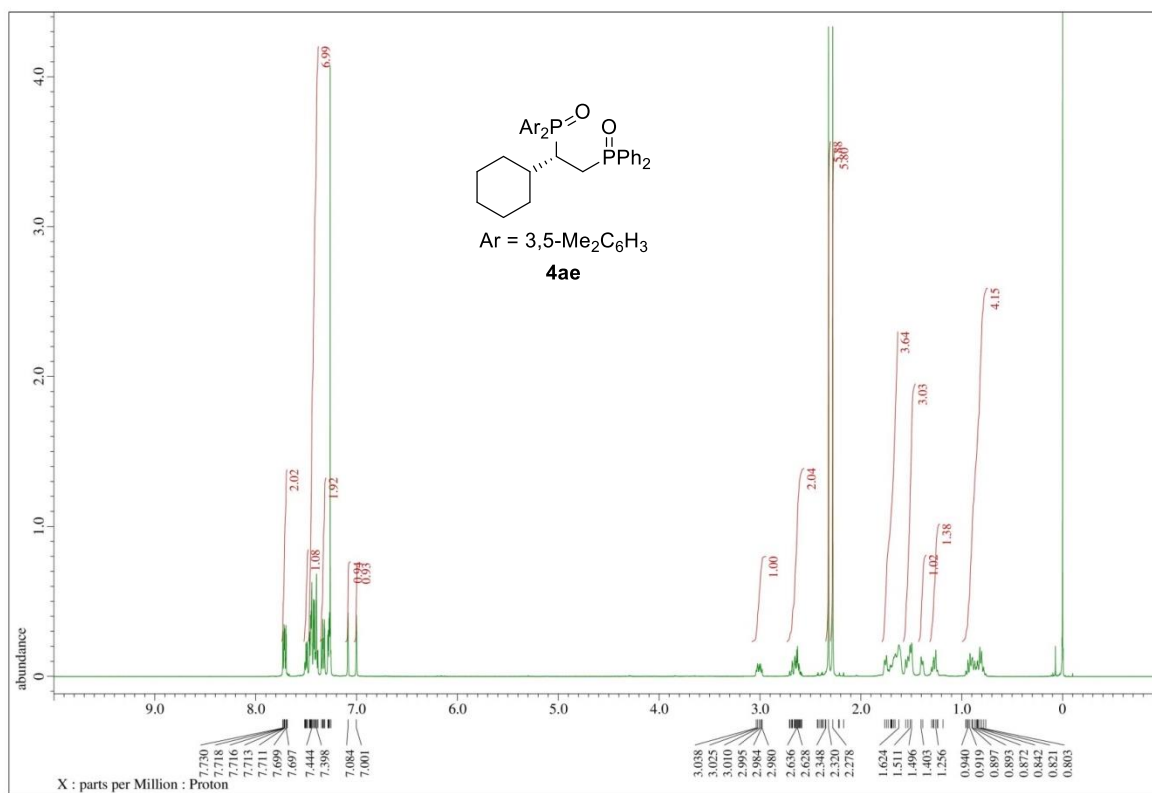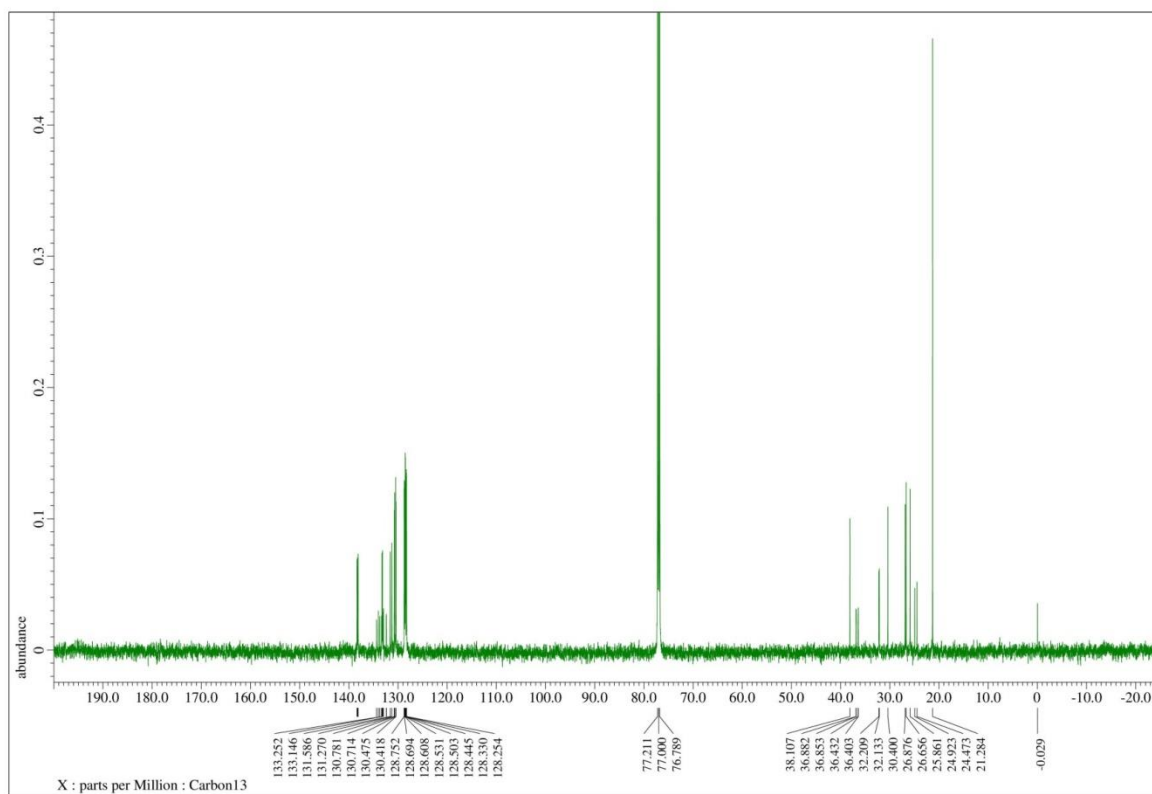

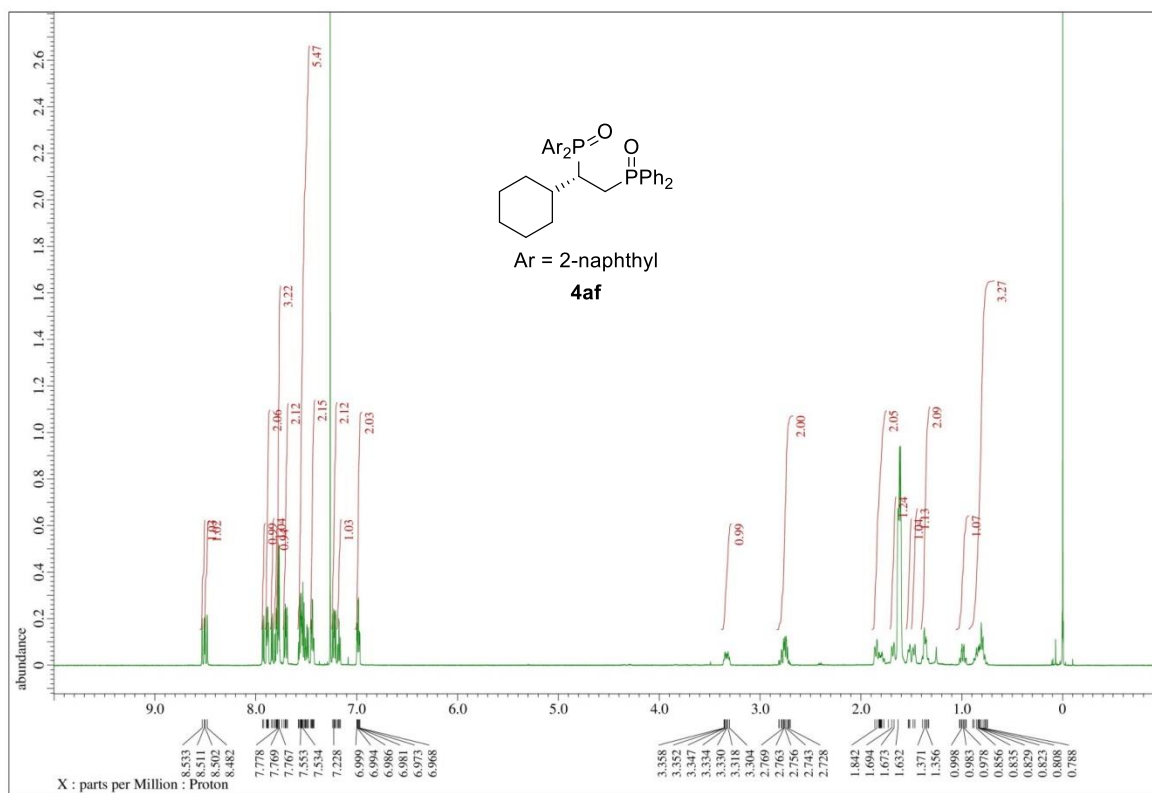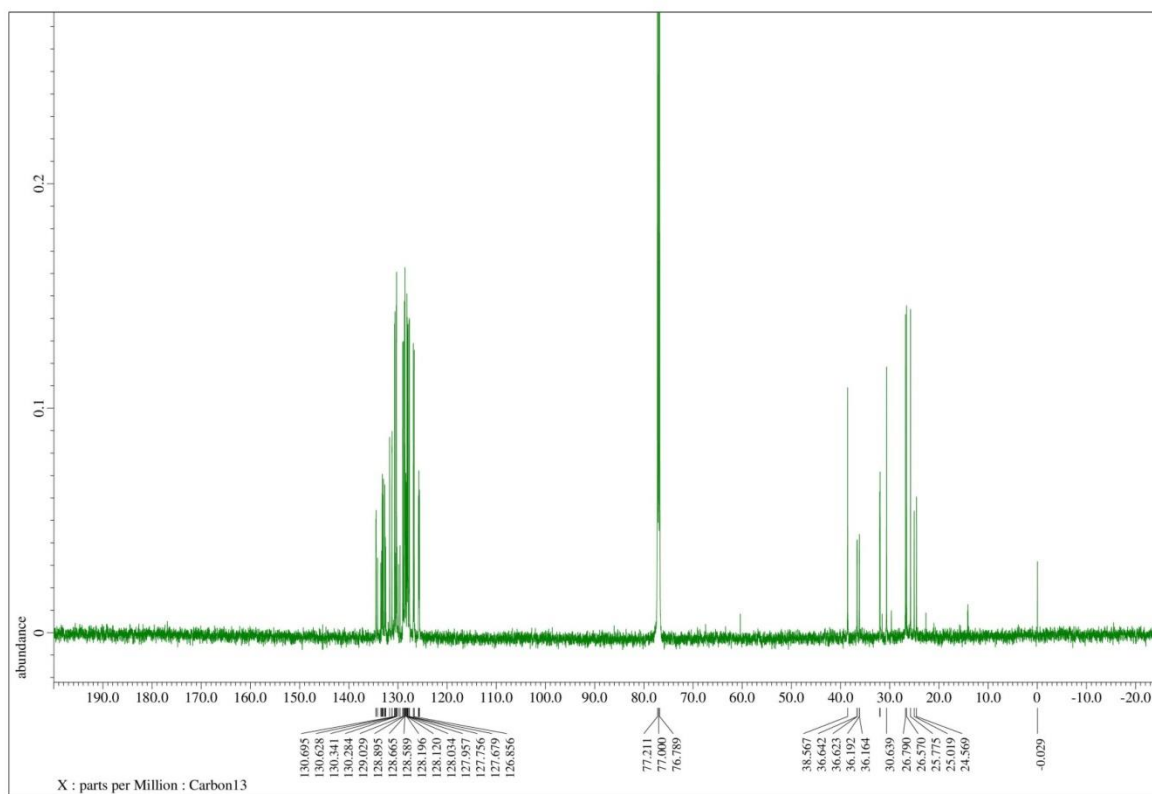

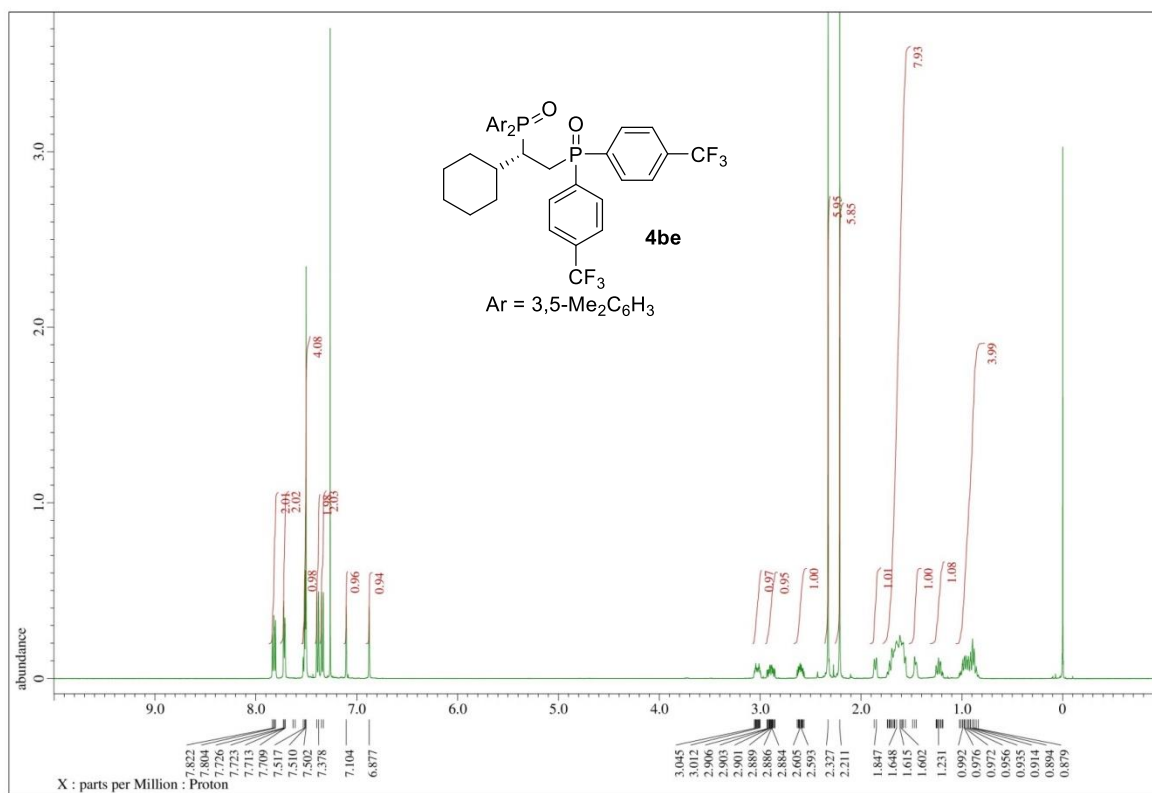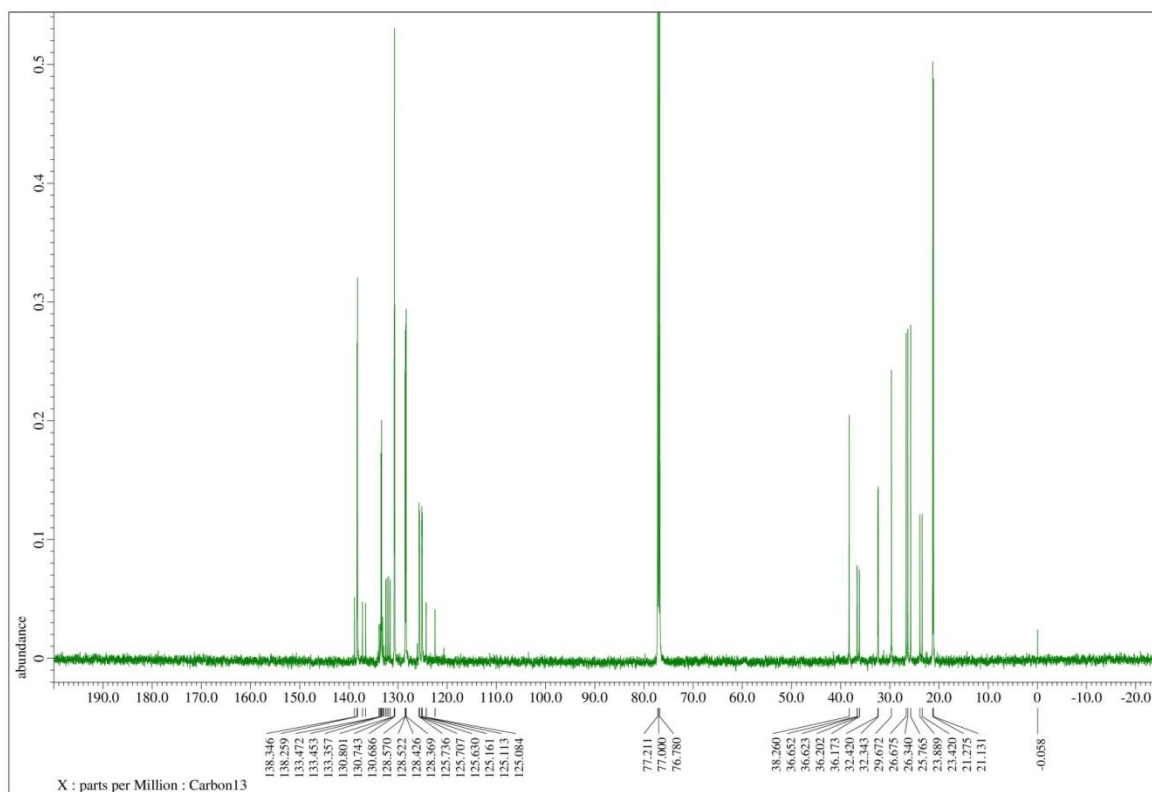

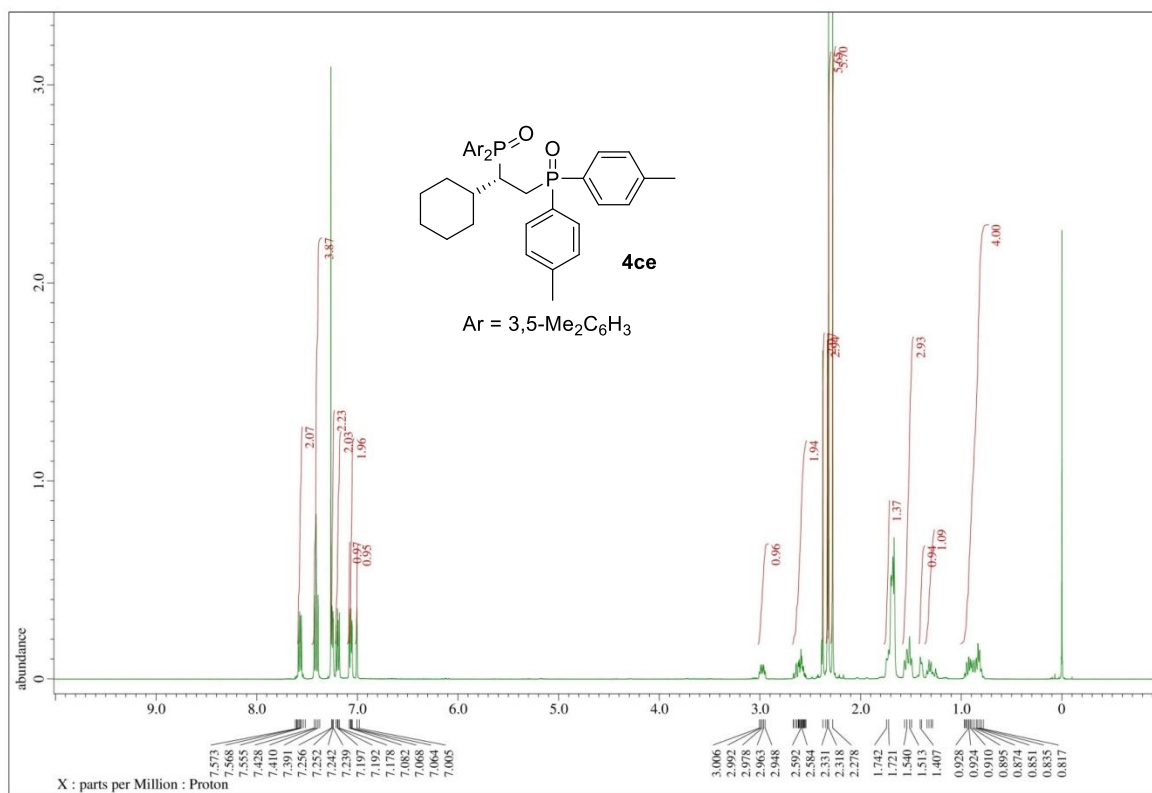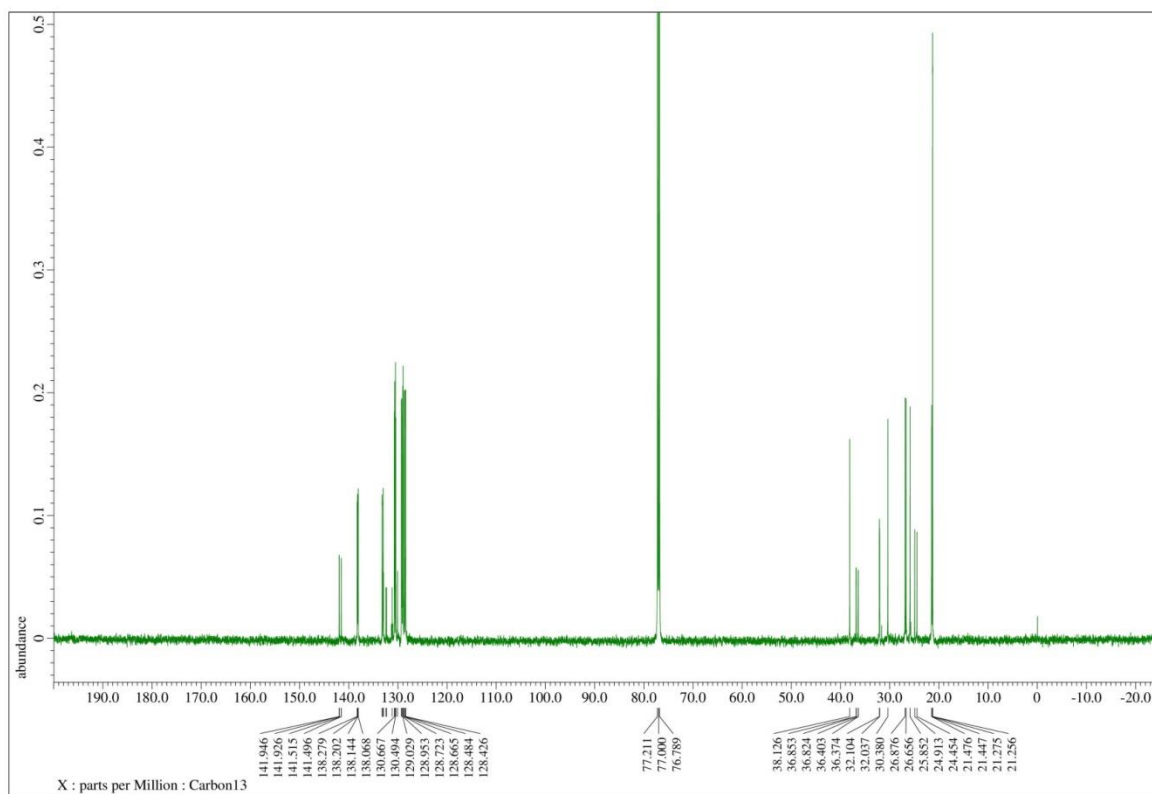

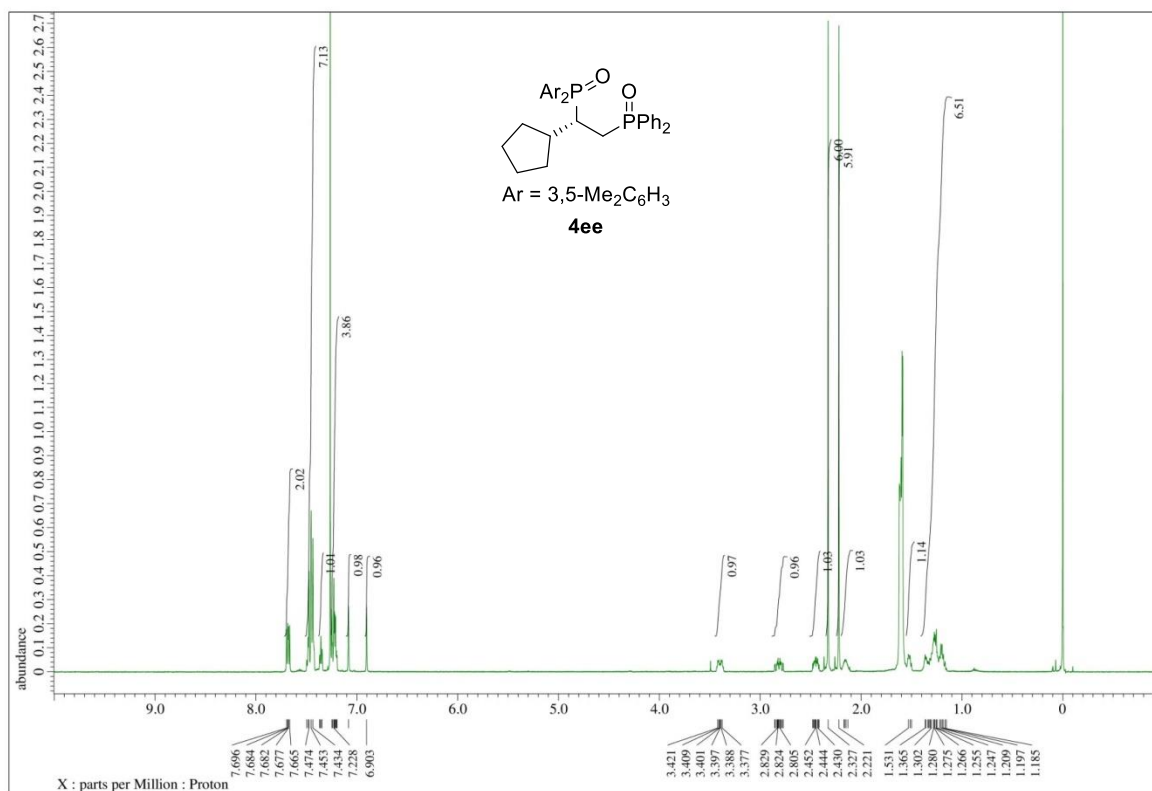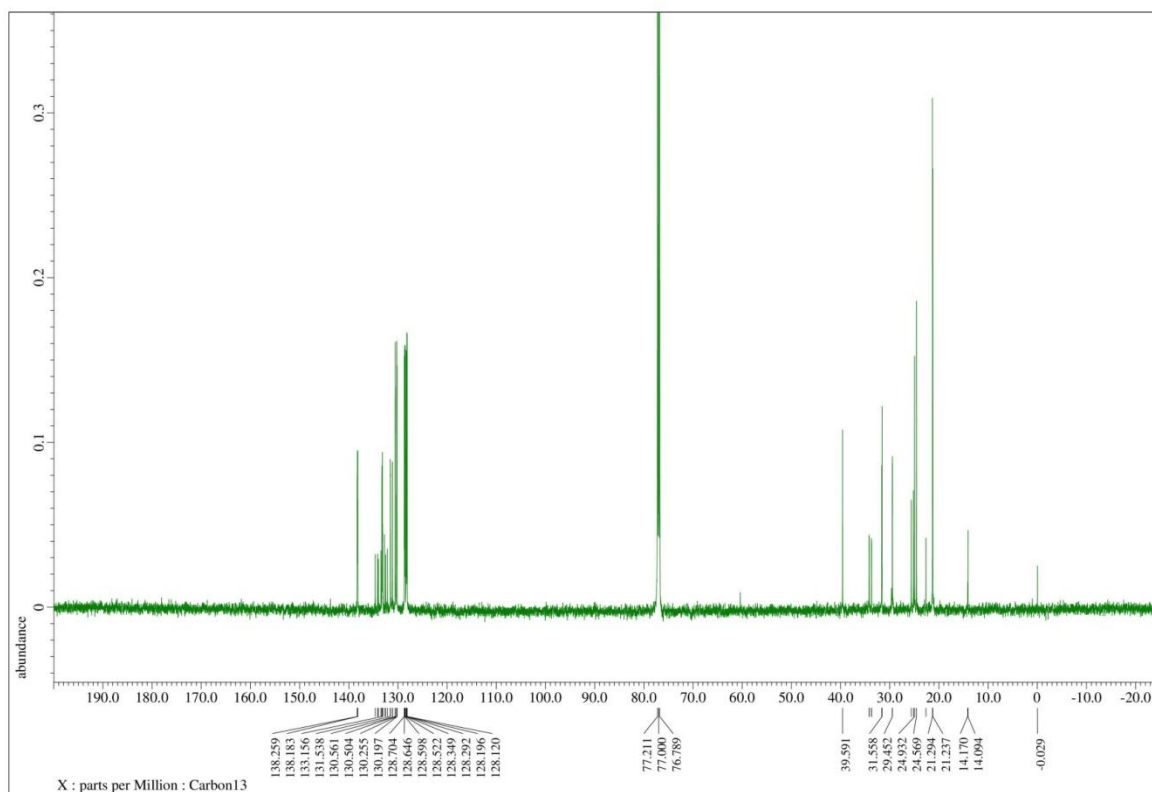

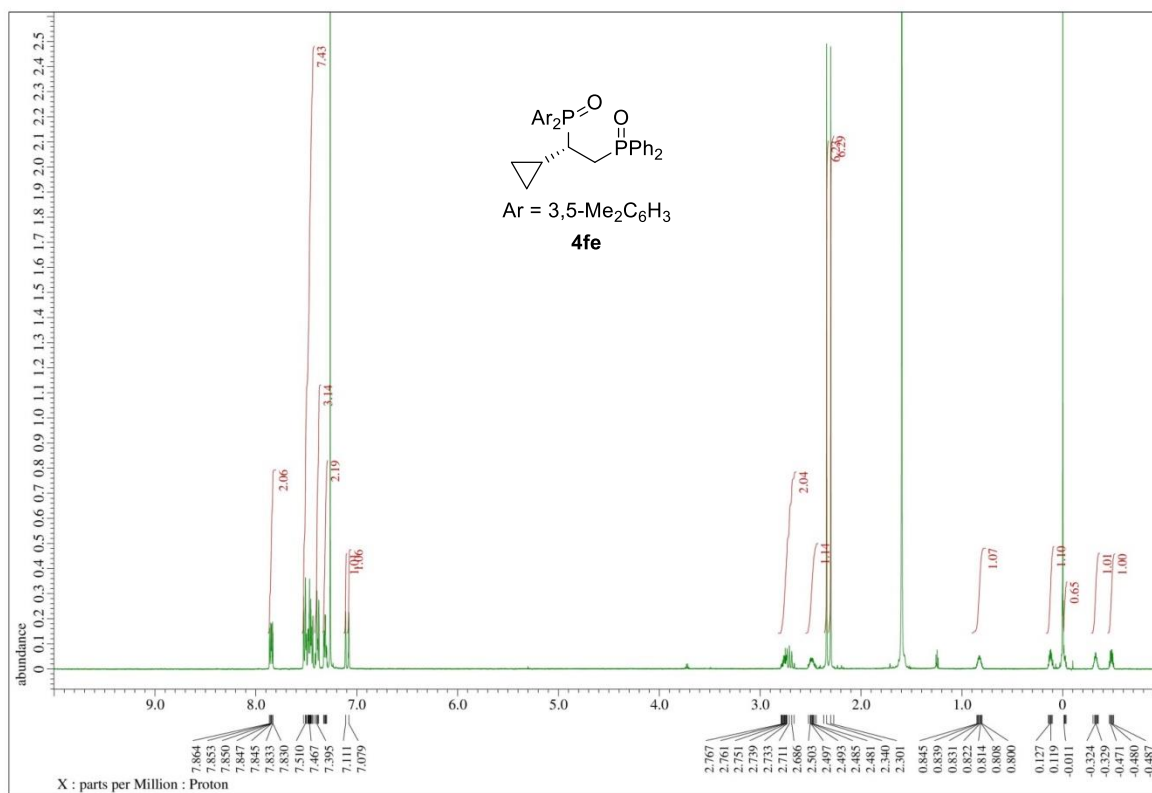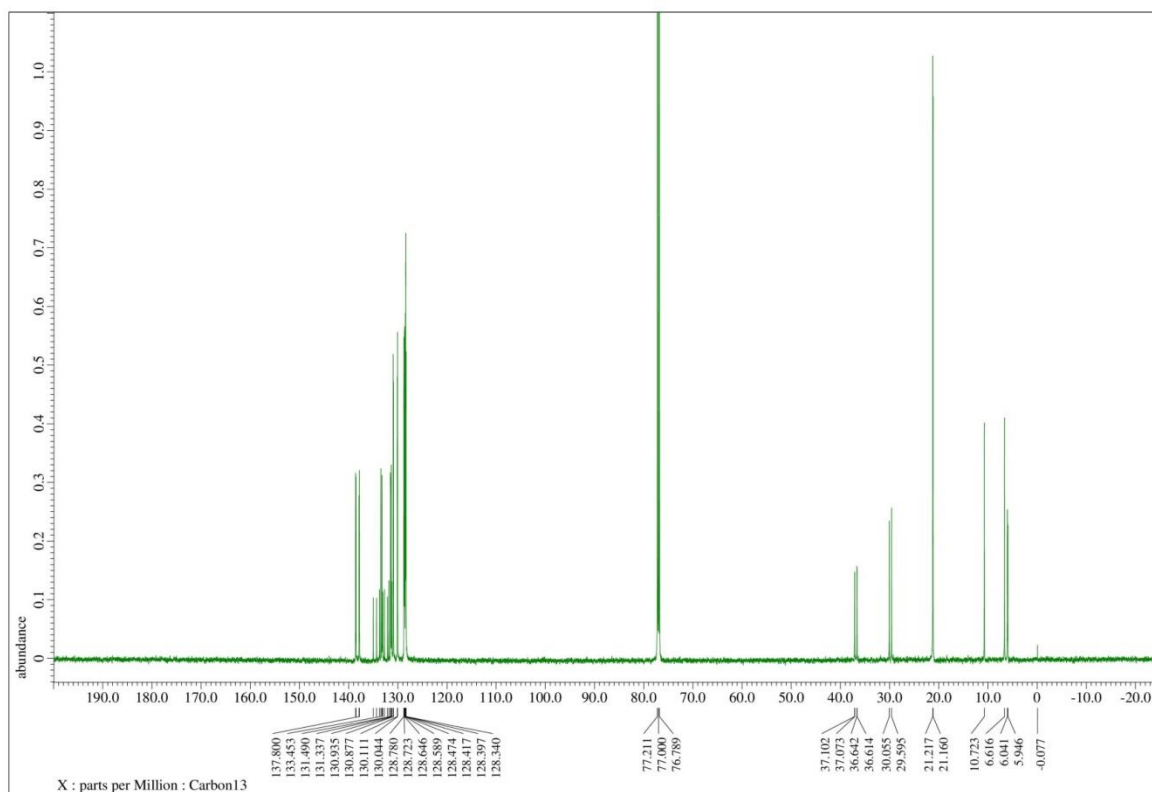

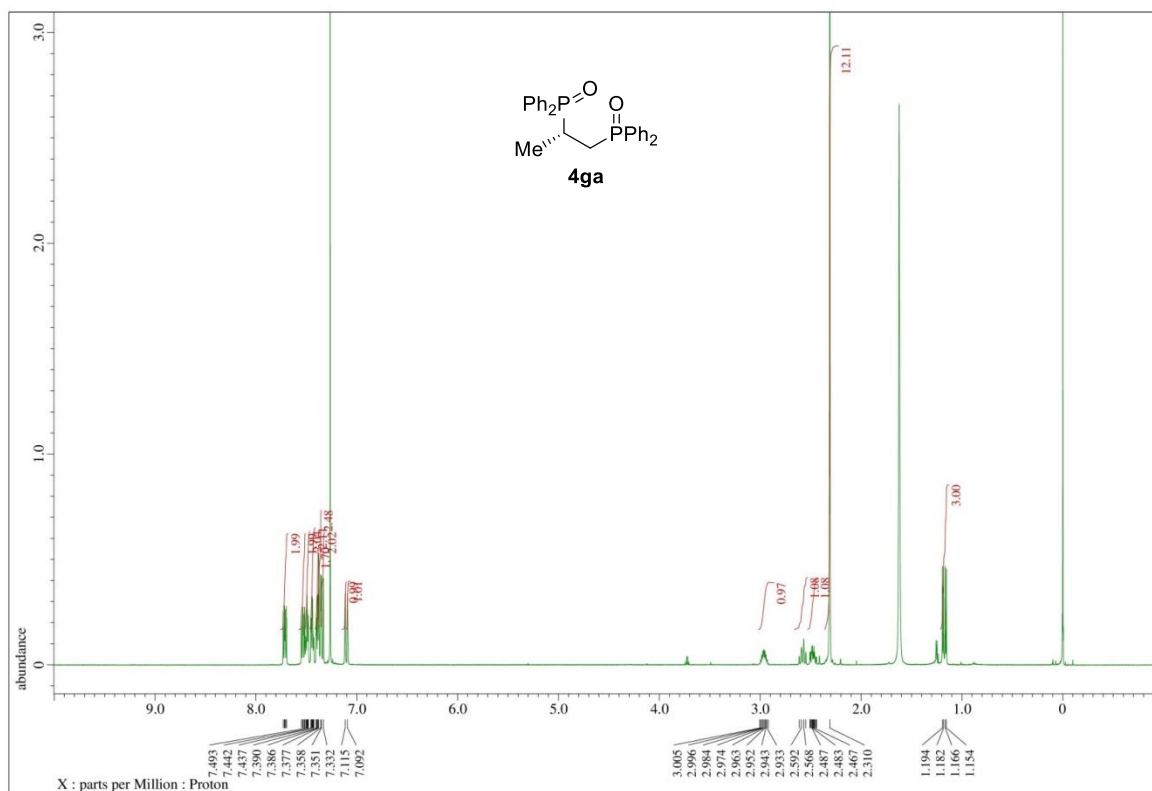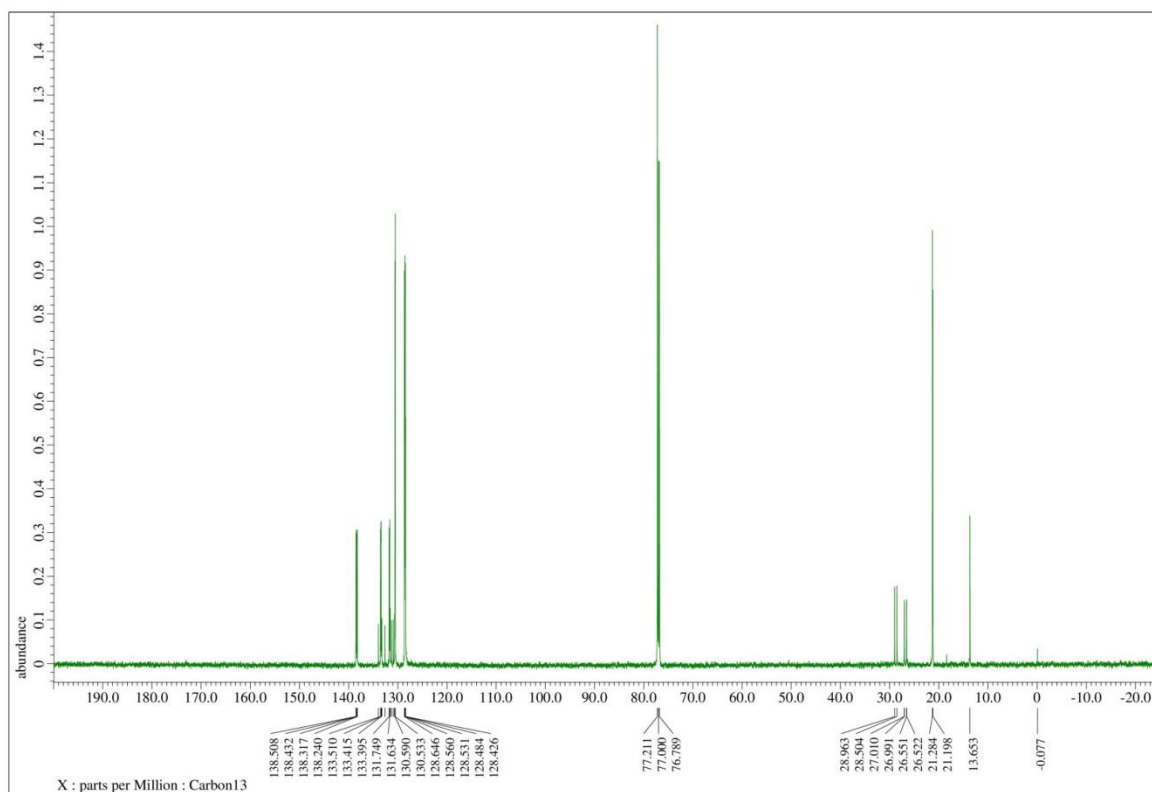

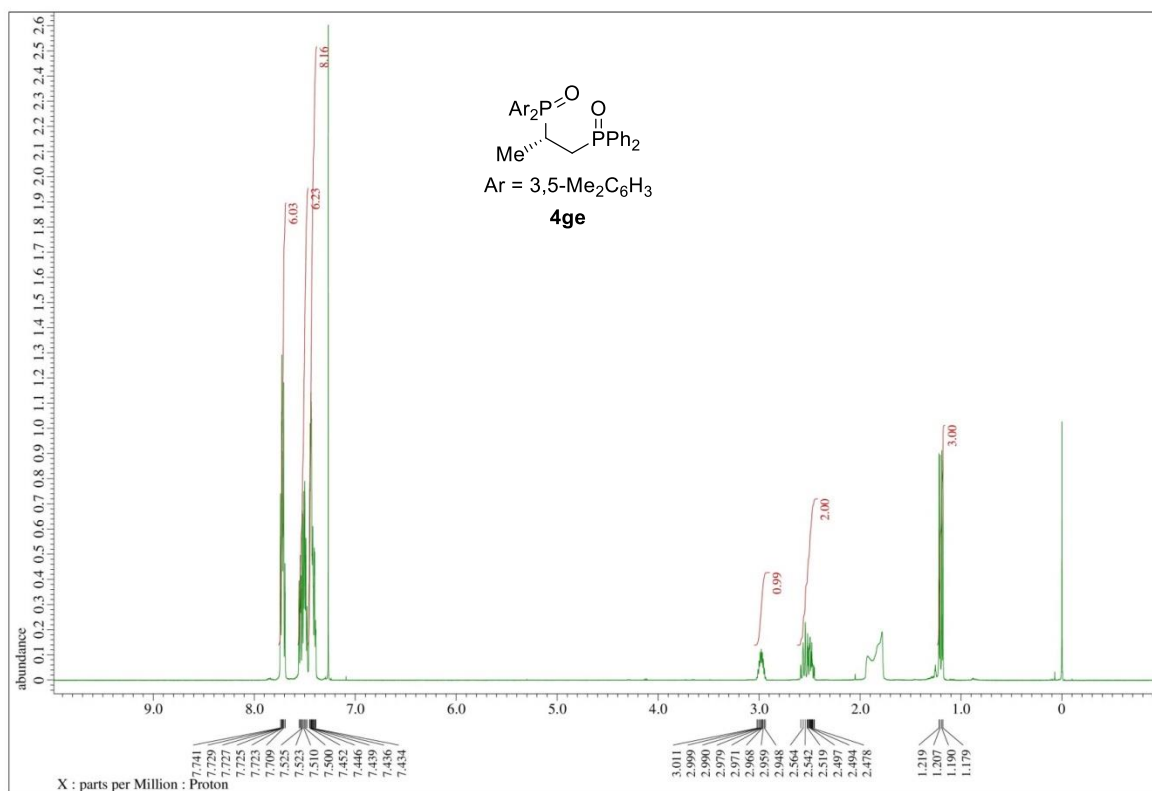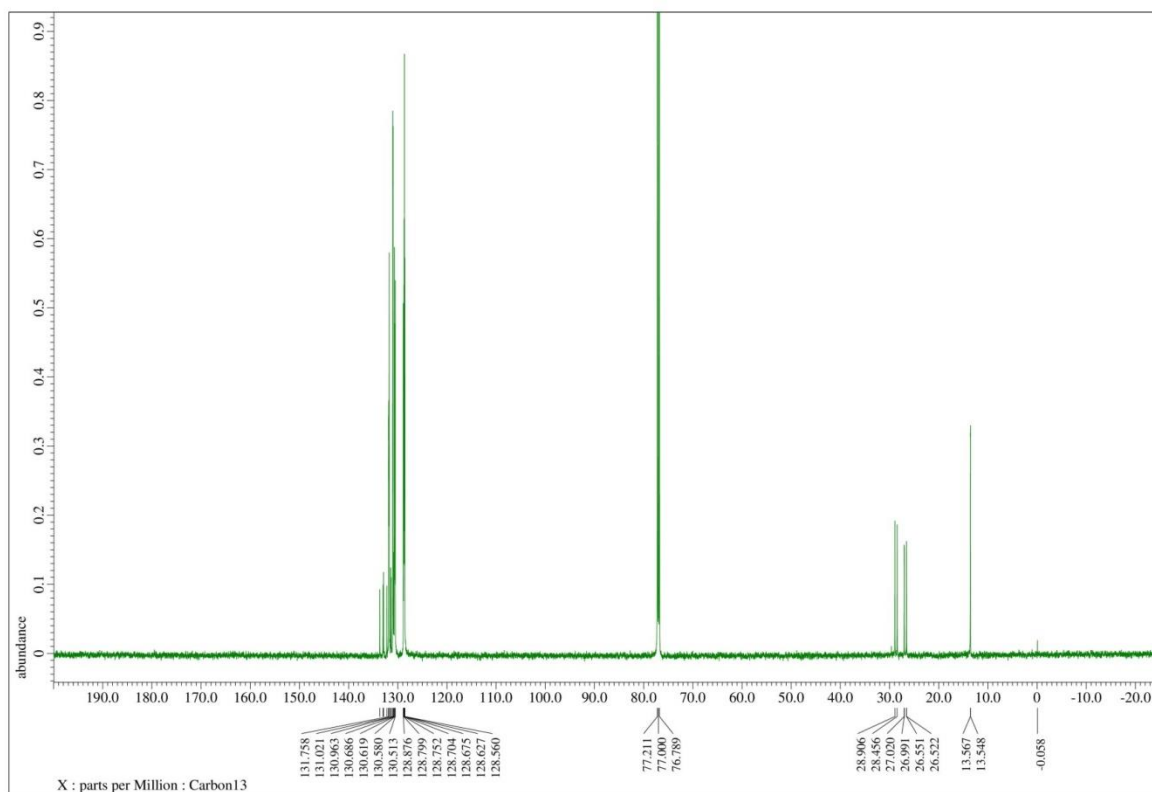



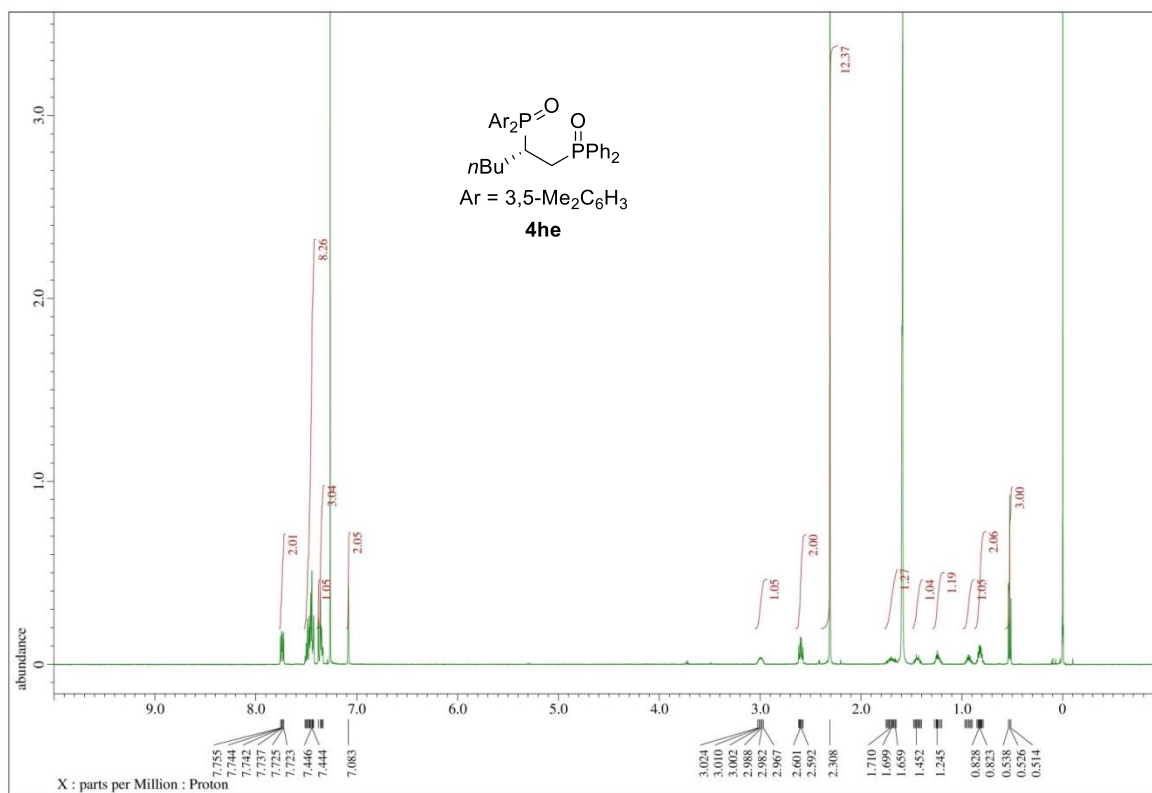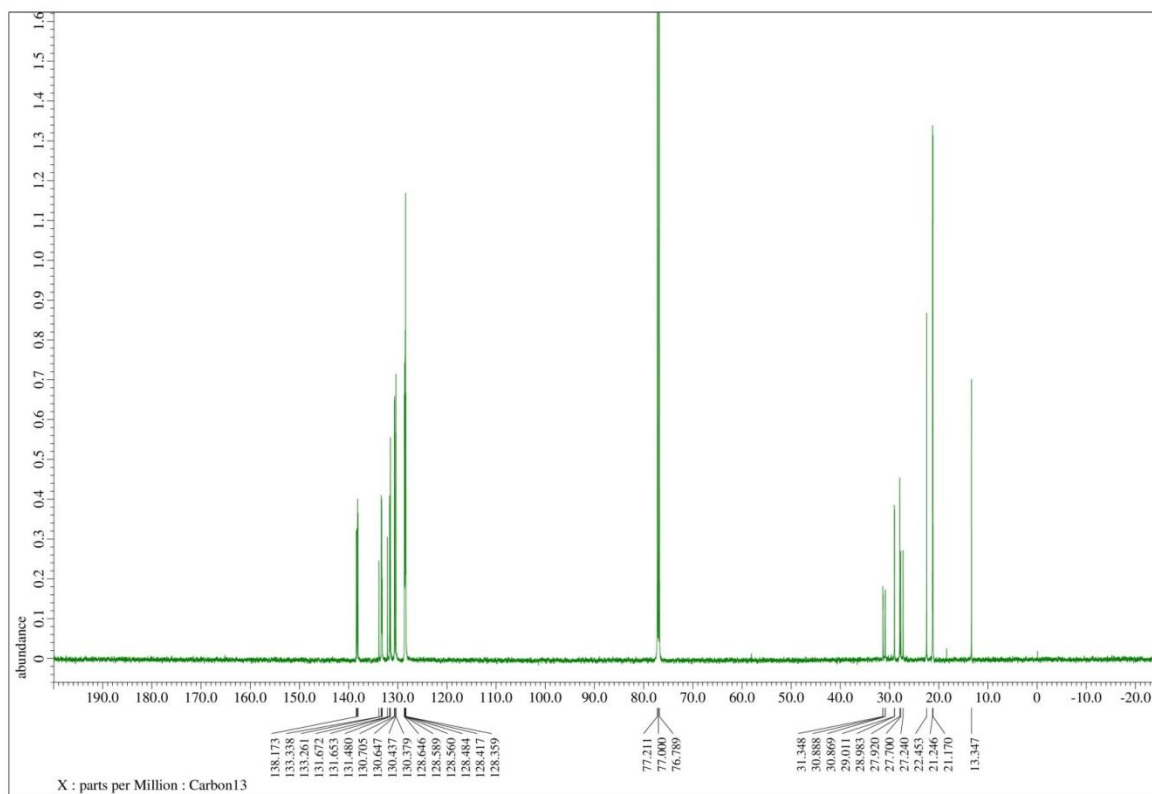

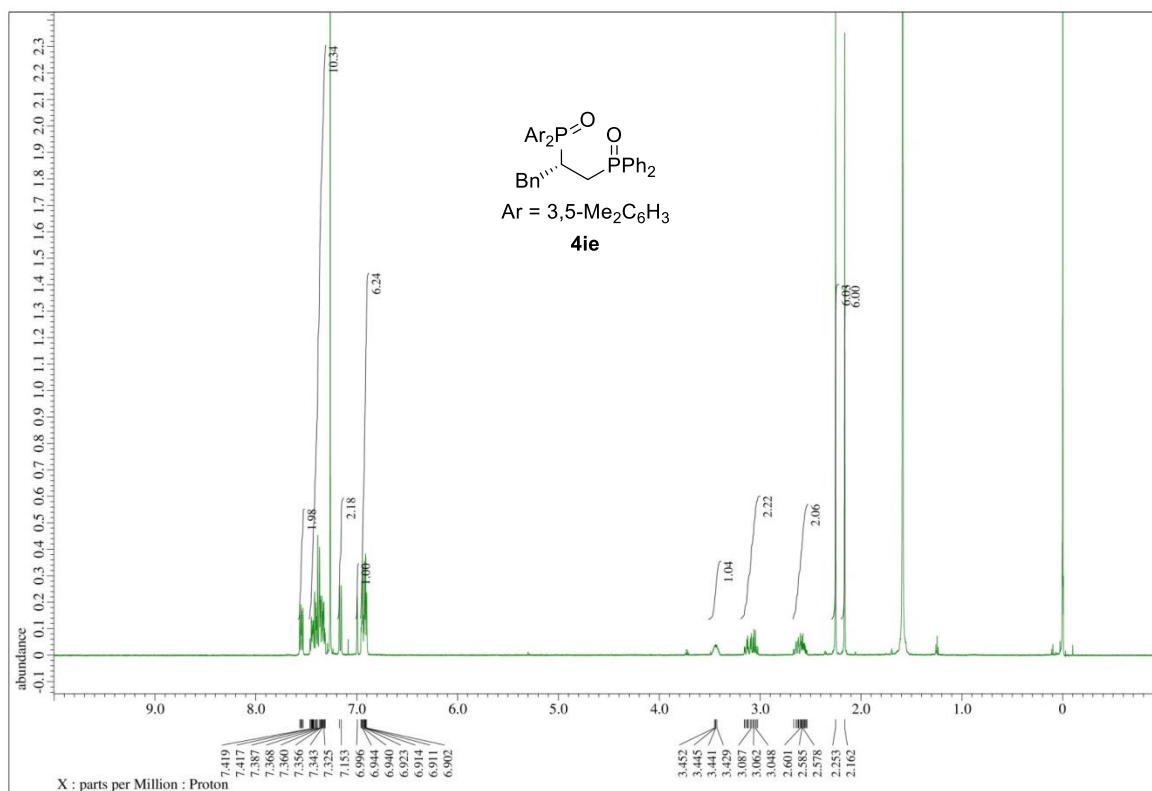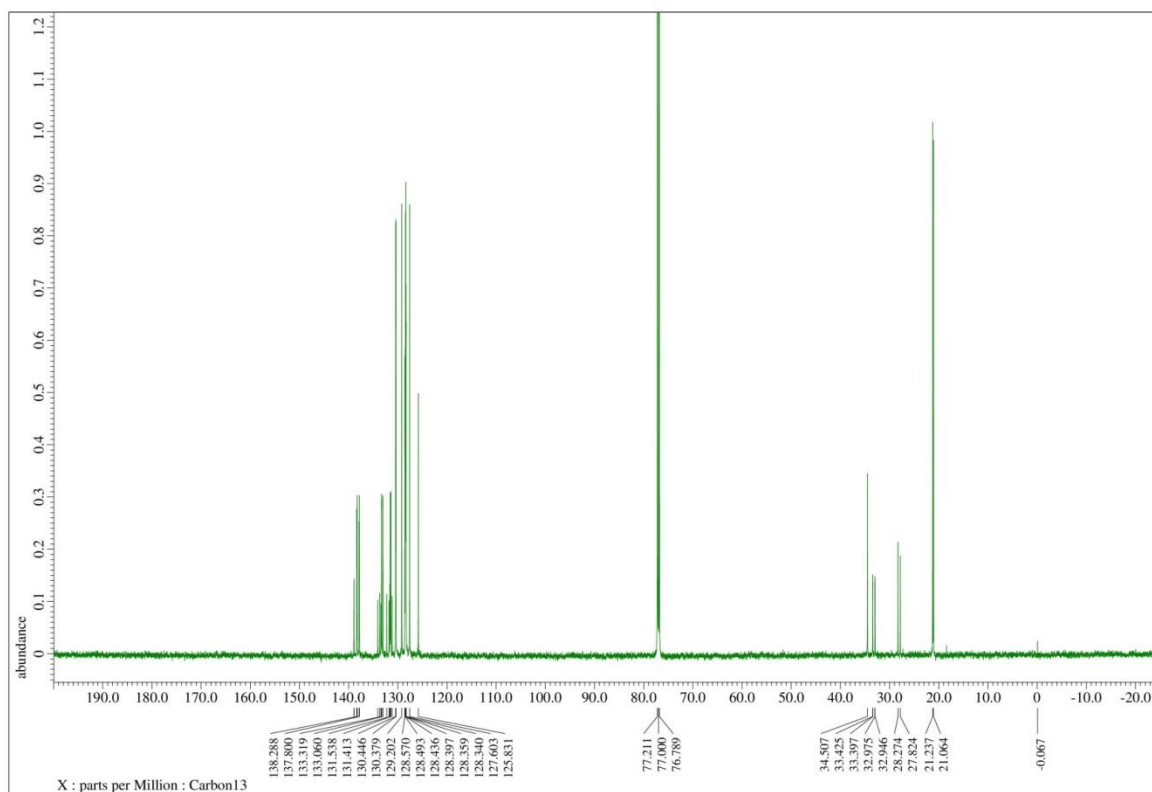



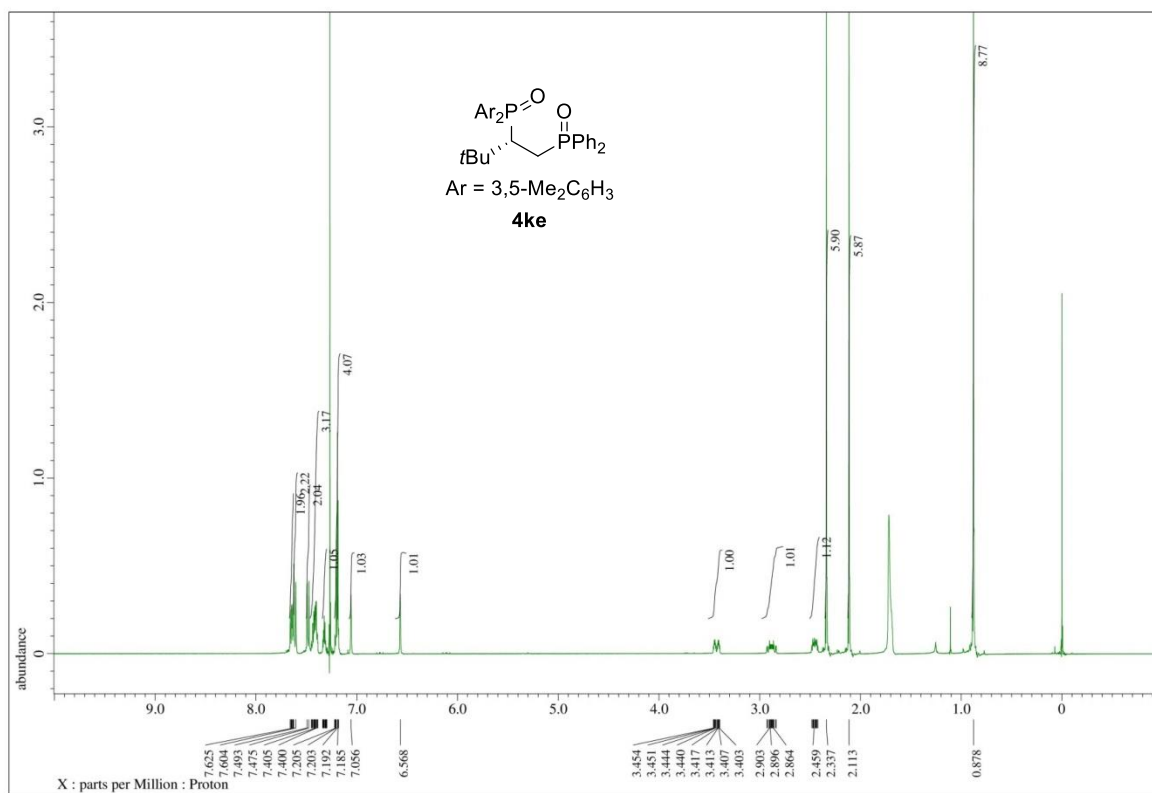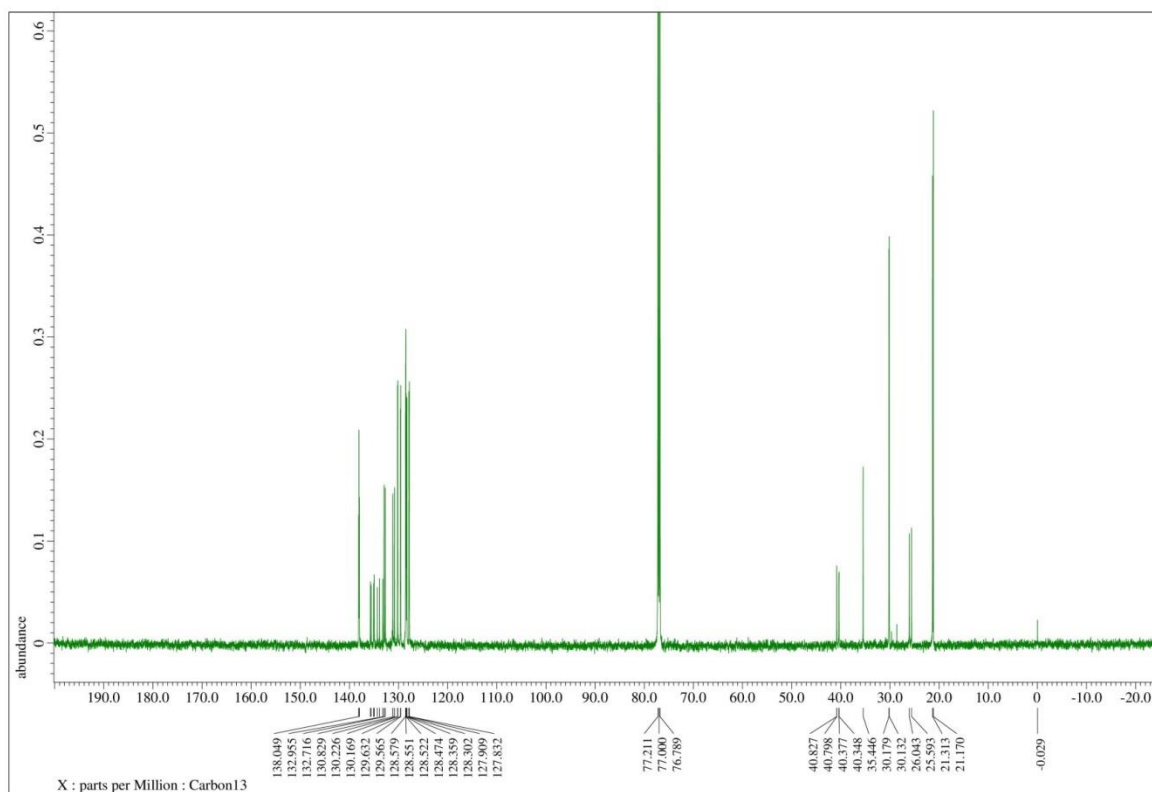

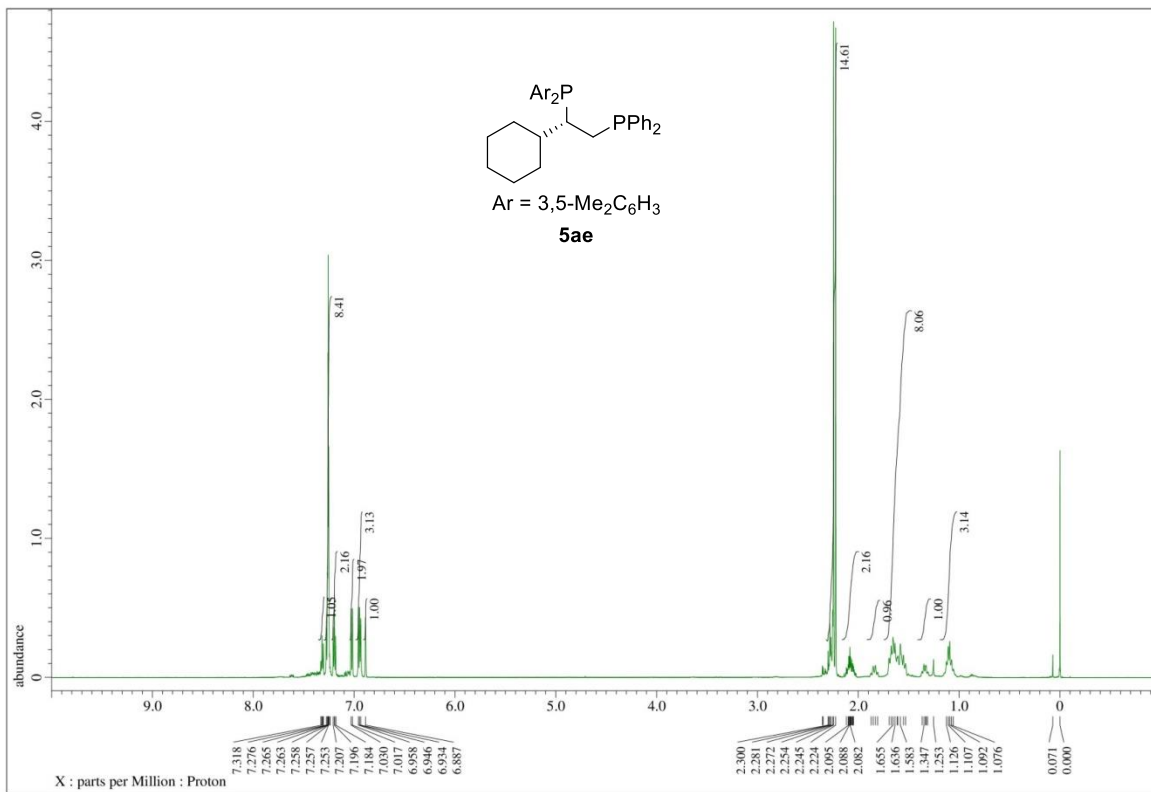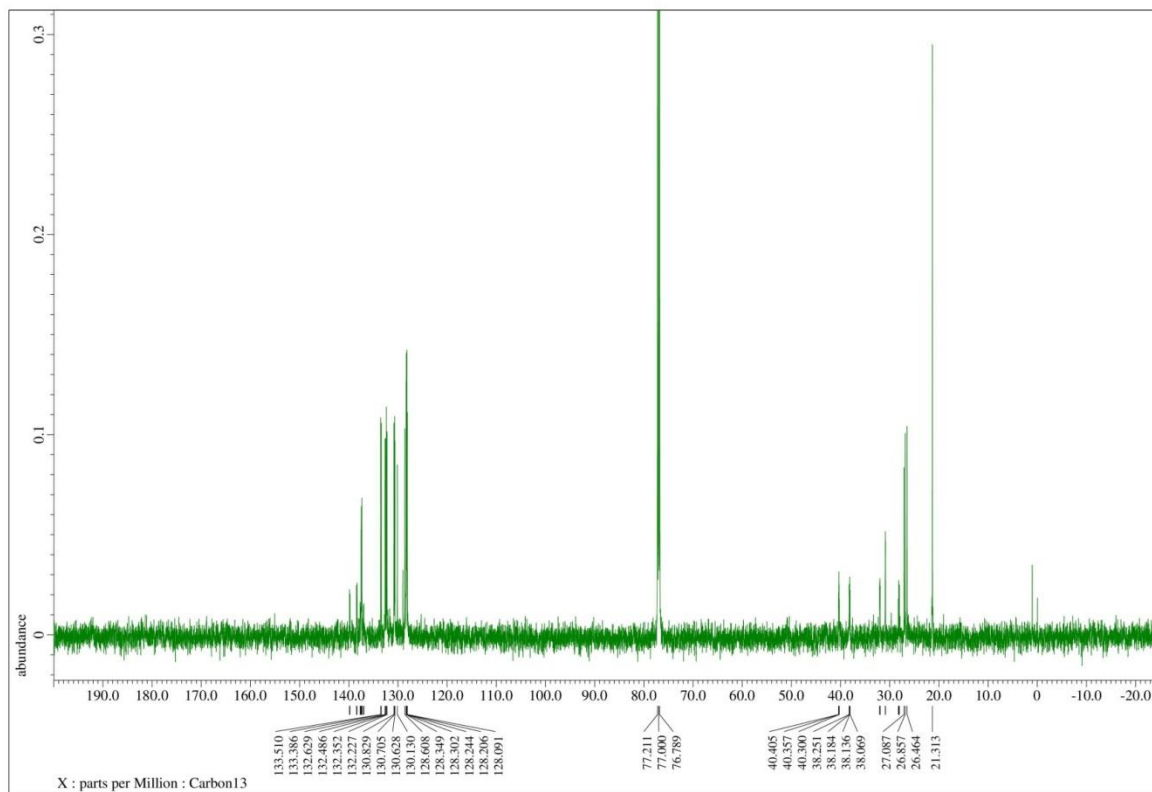

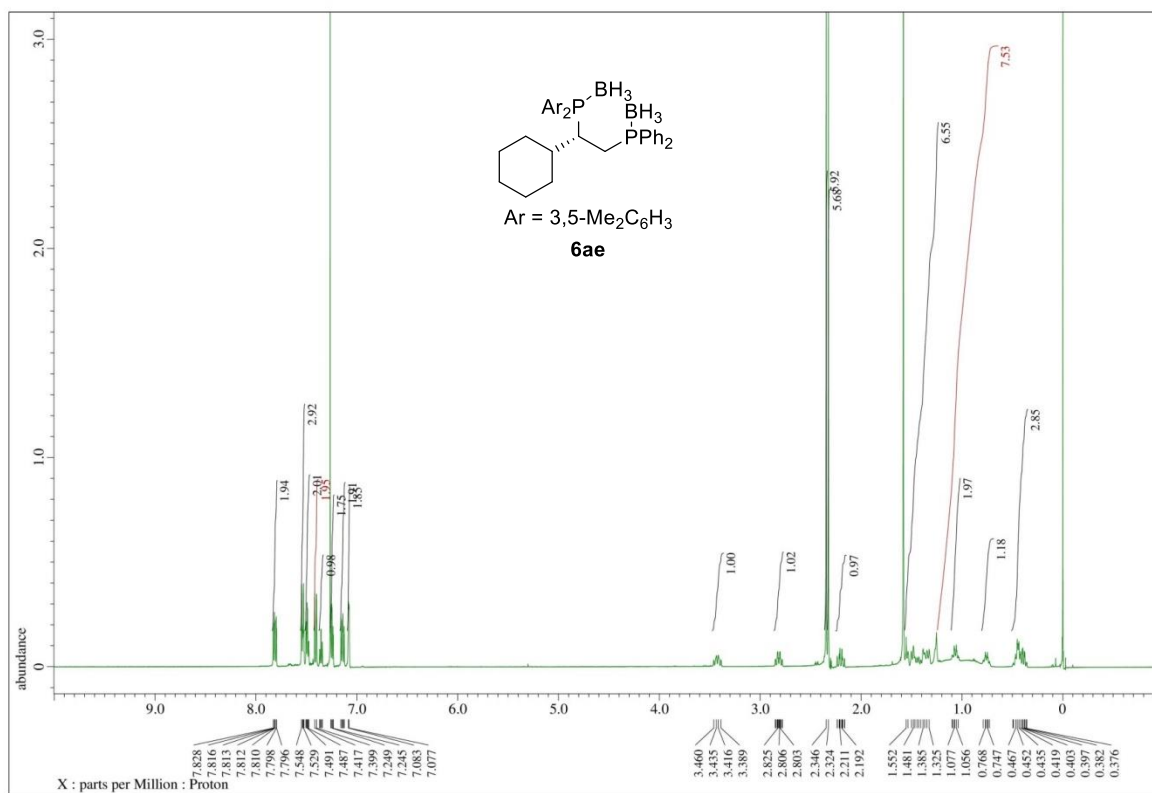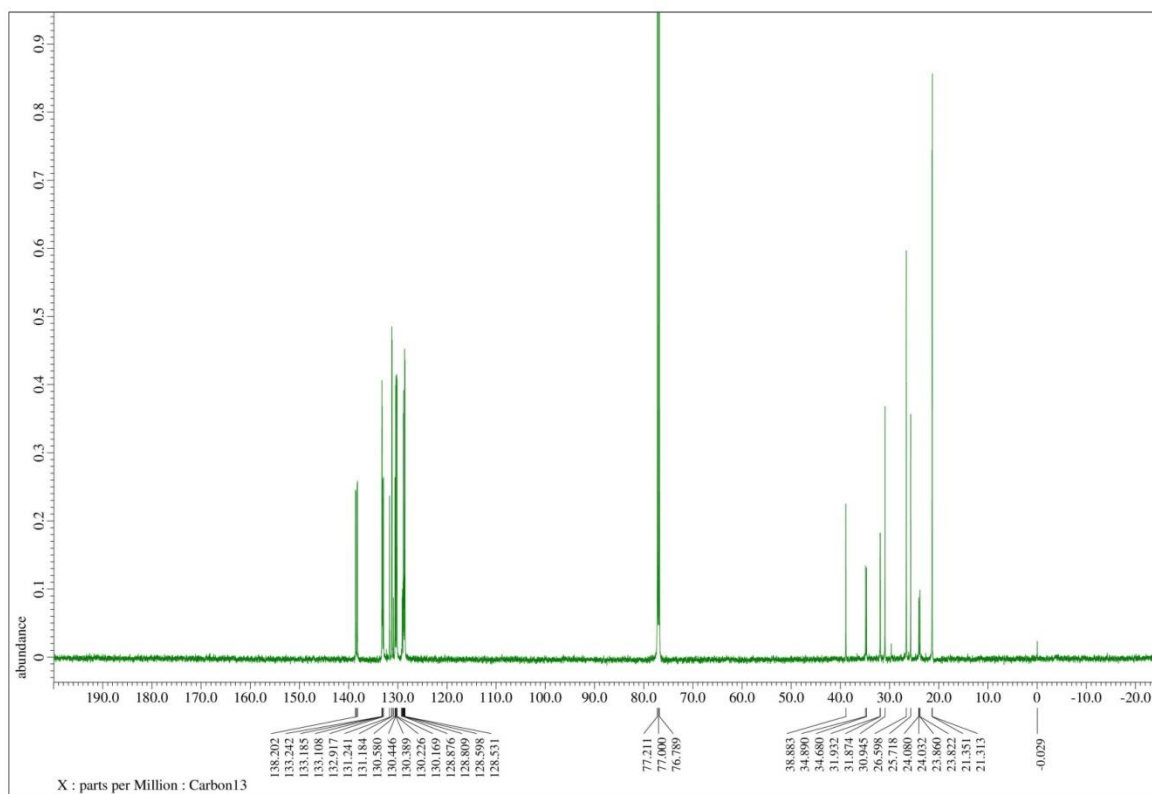

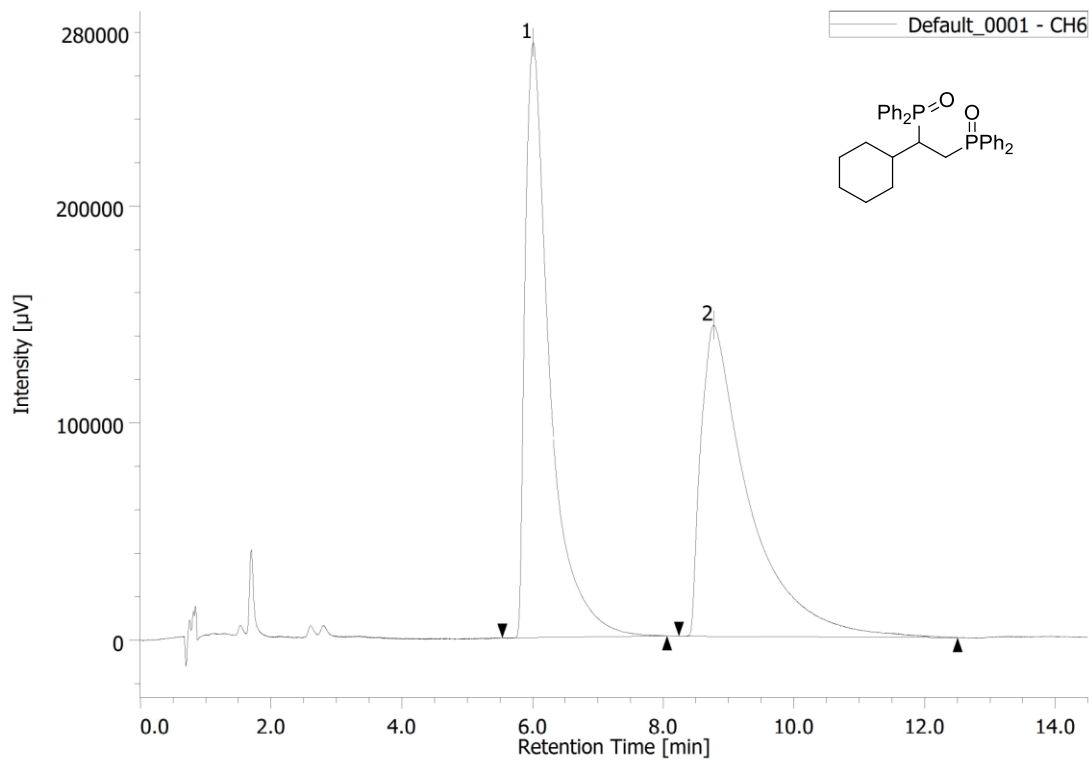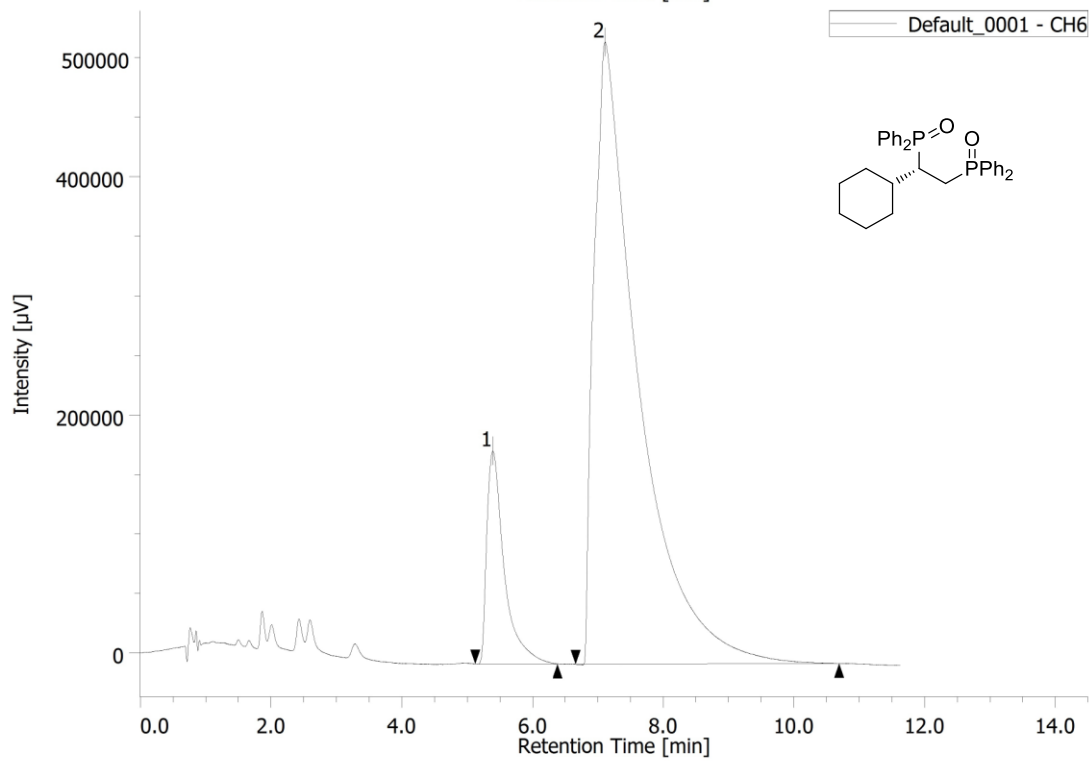

**4aa**

| Peak                 | 1    | 2    |
|----------------------|------|------|
| Retention Time (min) | 5.4  | 7.1  |
| Area (%)             | 11.8 | 88.2 |

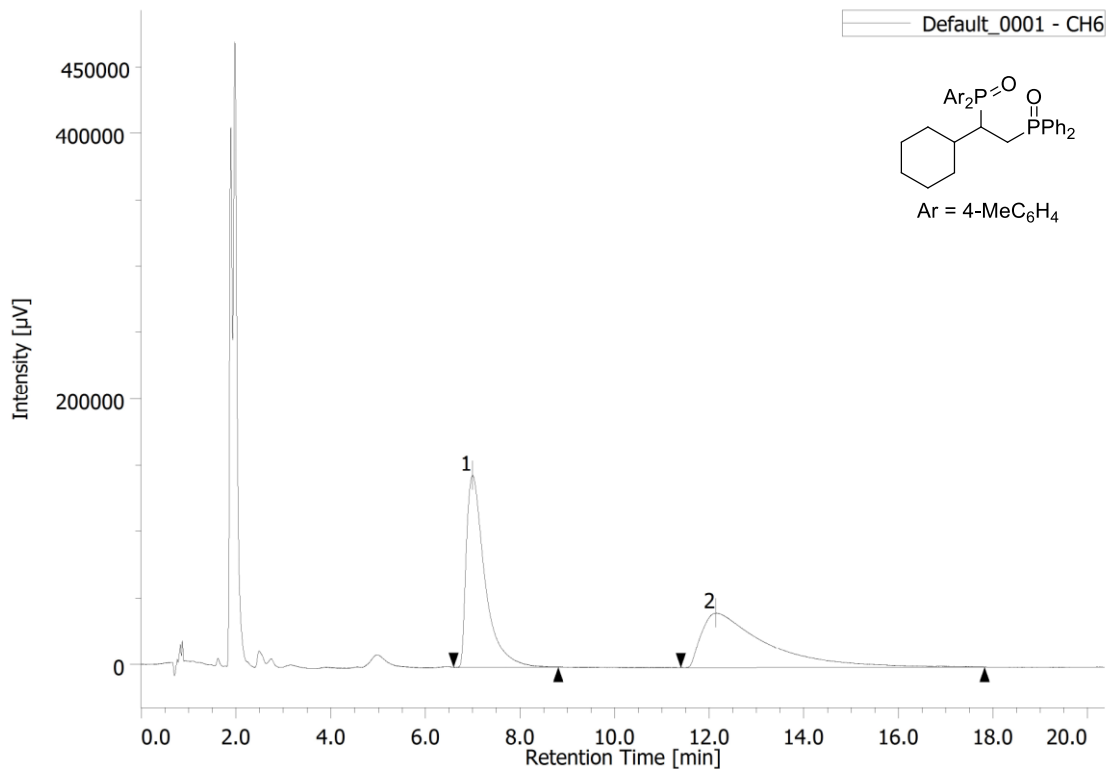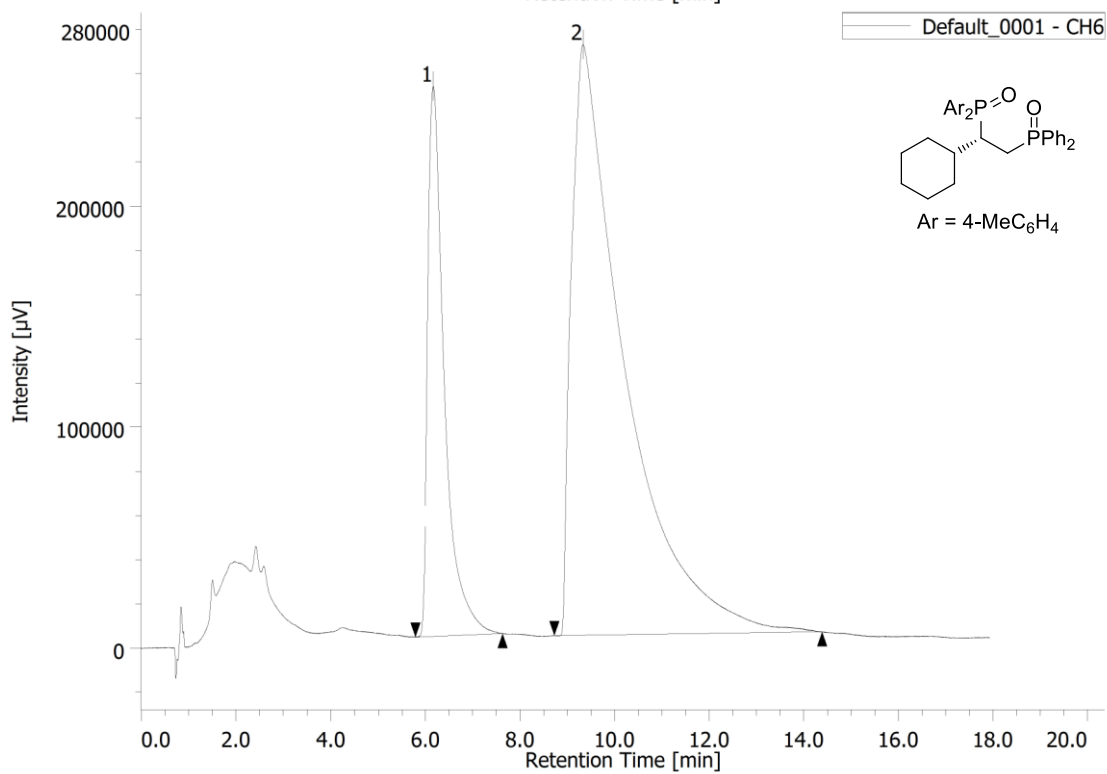

**4ab**

| Peak                 | 1    | 2    |
|----------------------|------|------|
| Retention Time (min) | 6.2  | 9.3  |
| Area (%)             | 22.7 | 77.3 |



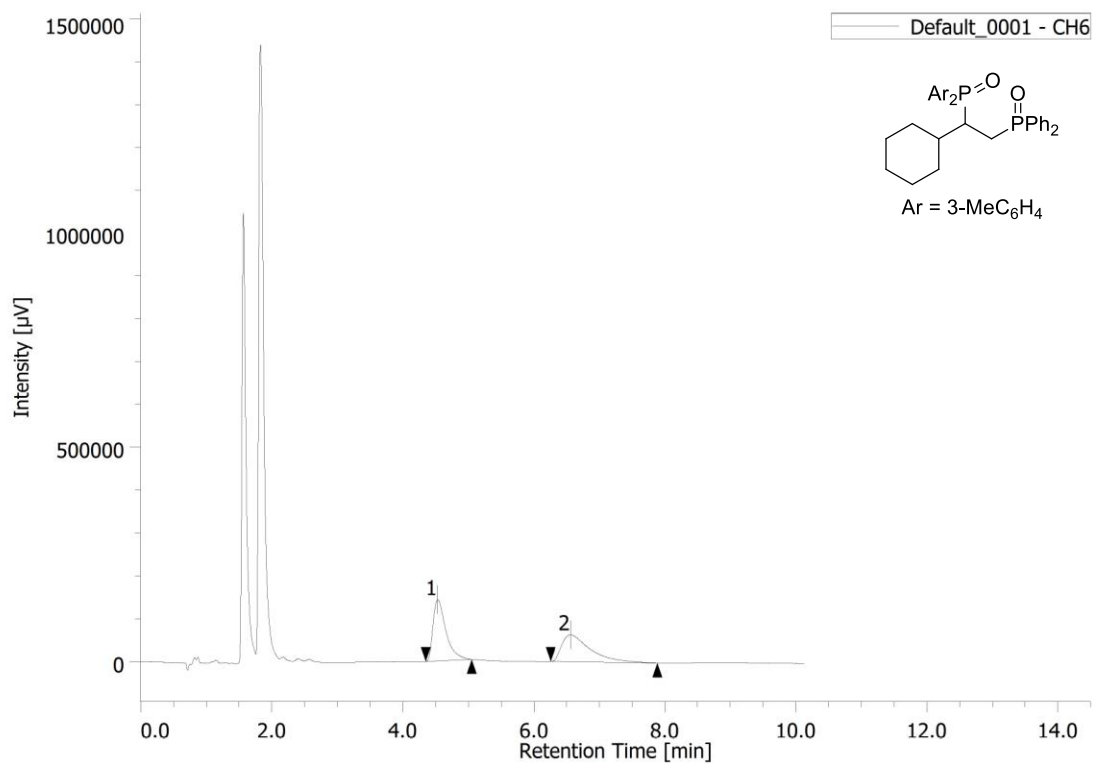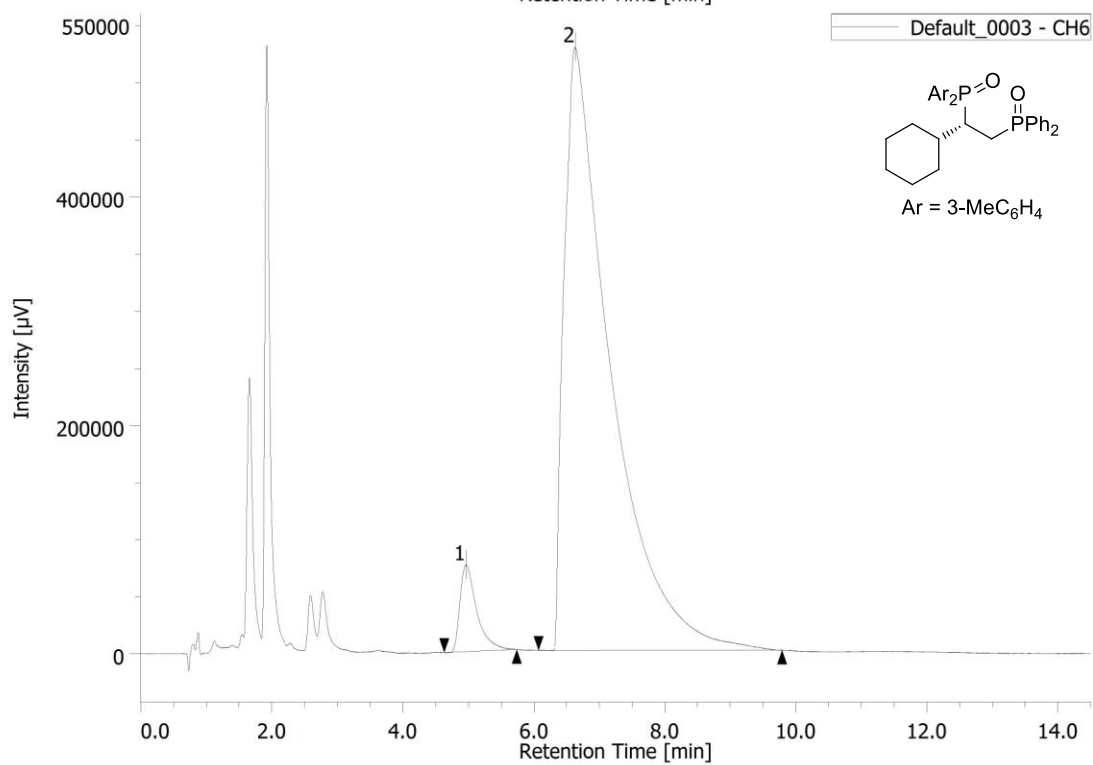

**4ad**

| Peak                 | 1    | 2    |
|----------------------|------|------|
| Retention Time (min) | 5.0  | 4.9  |
| Area (%)             | 22.7 | 95.1 |

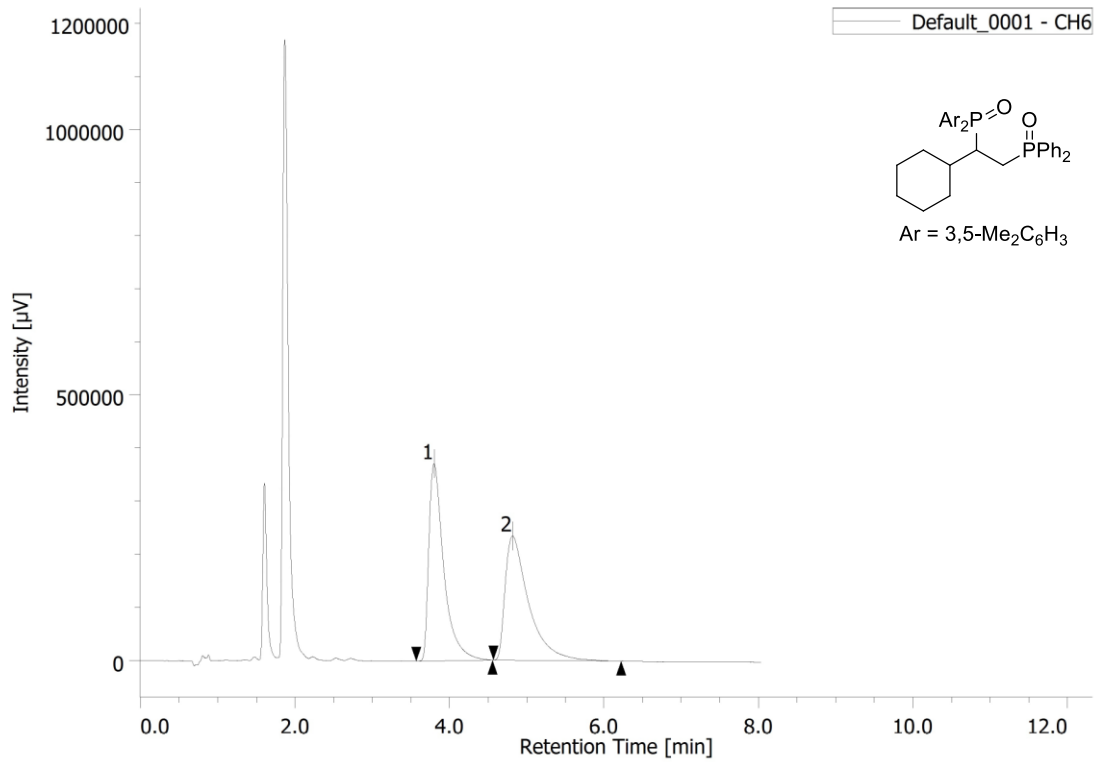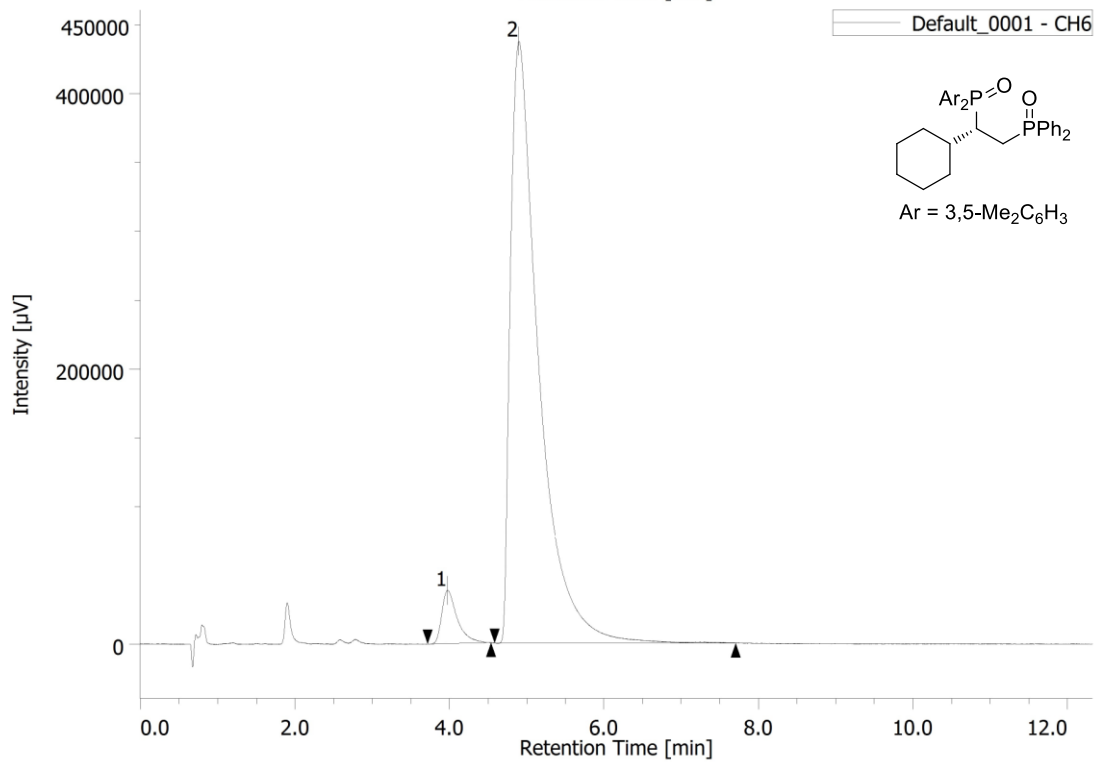

**4ae**

| Peak                 | 1   | 2    |
|----------------------|-----|------|
| Retention Time (min) | 4.0 | 4.9  |
| Area (%)             | 4.6 | 95.4 |

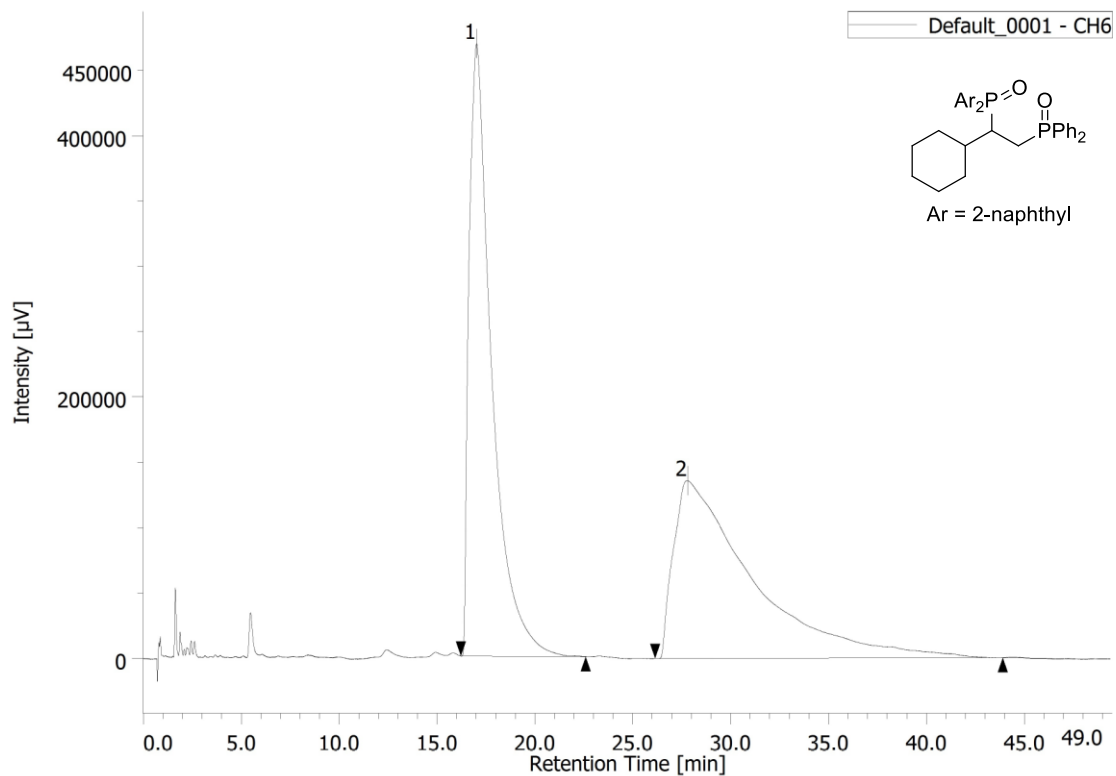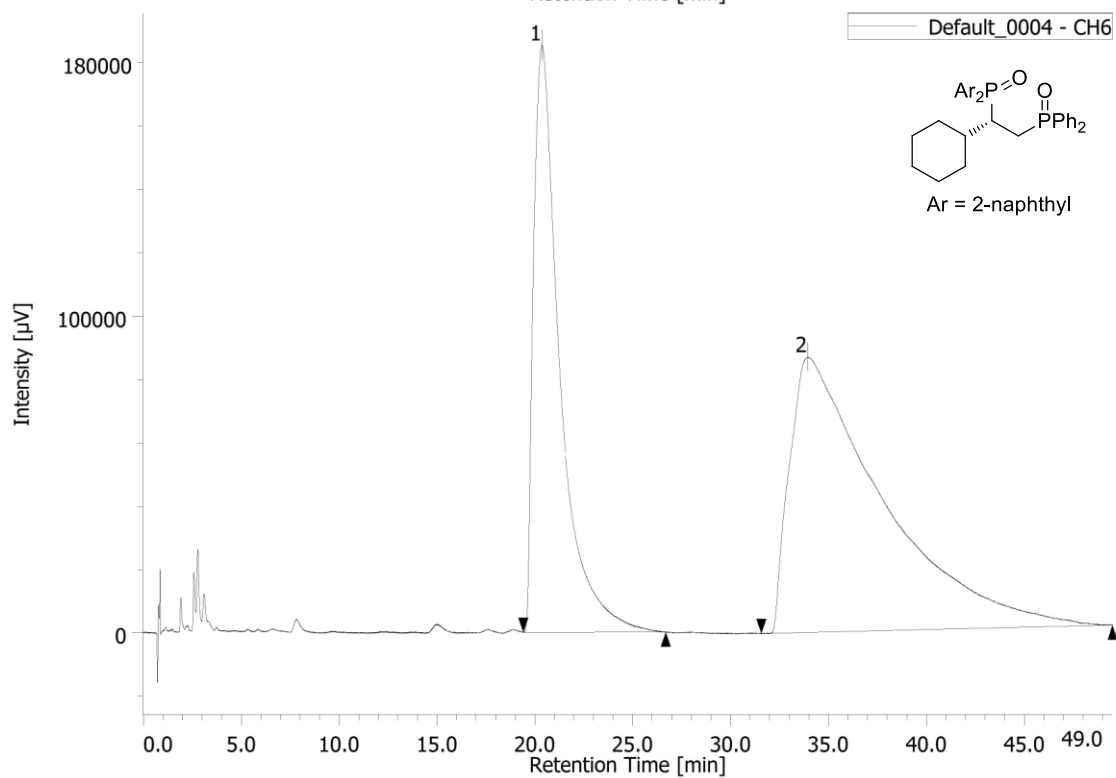

**4af**

| Peak                 | 1    | 2    |
|----------------------|------|------|
| Retention Time (min) | 20.4 | 33.9 |
| Area (%)             | 37.6 | 62.4 |

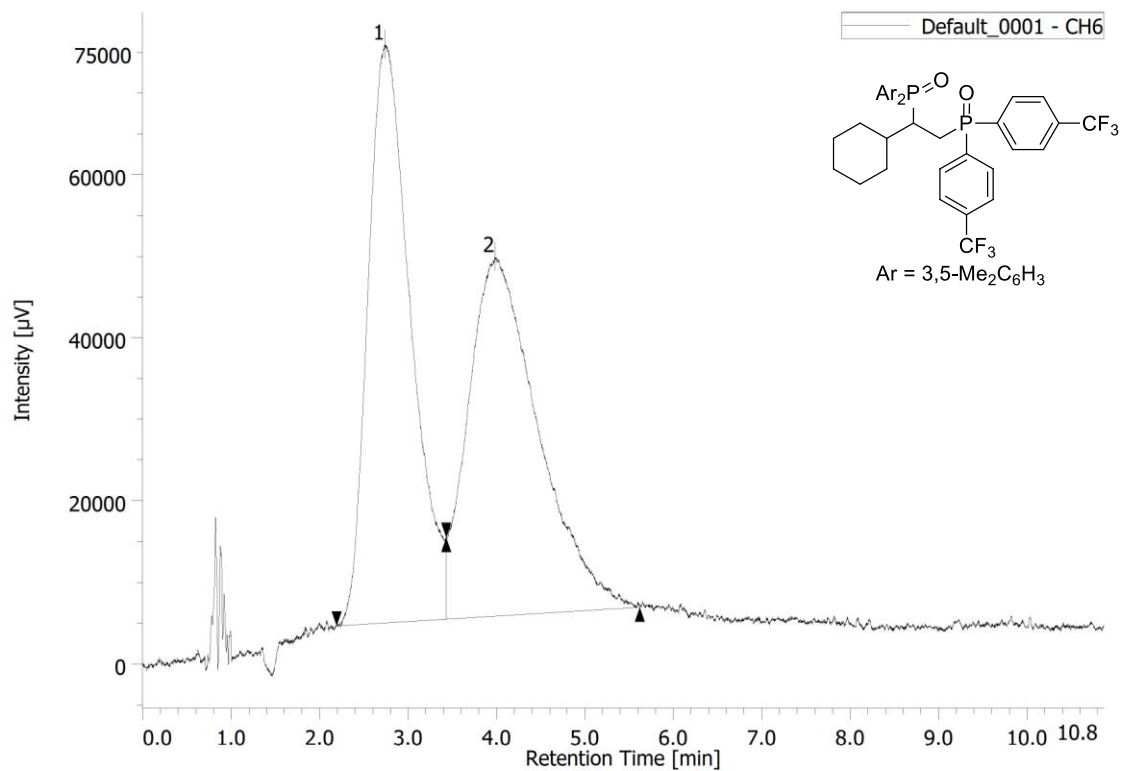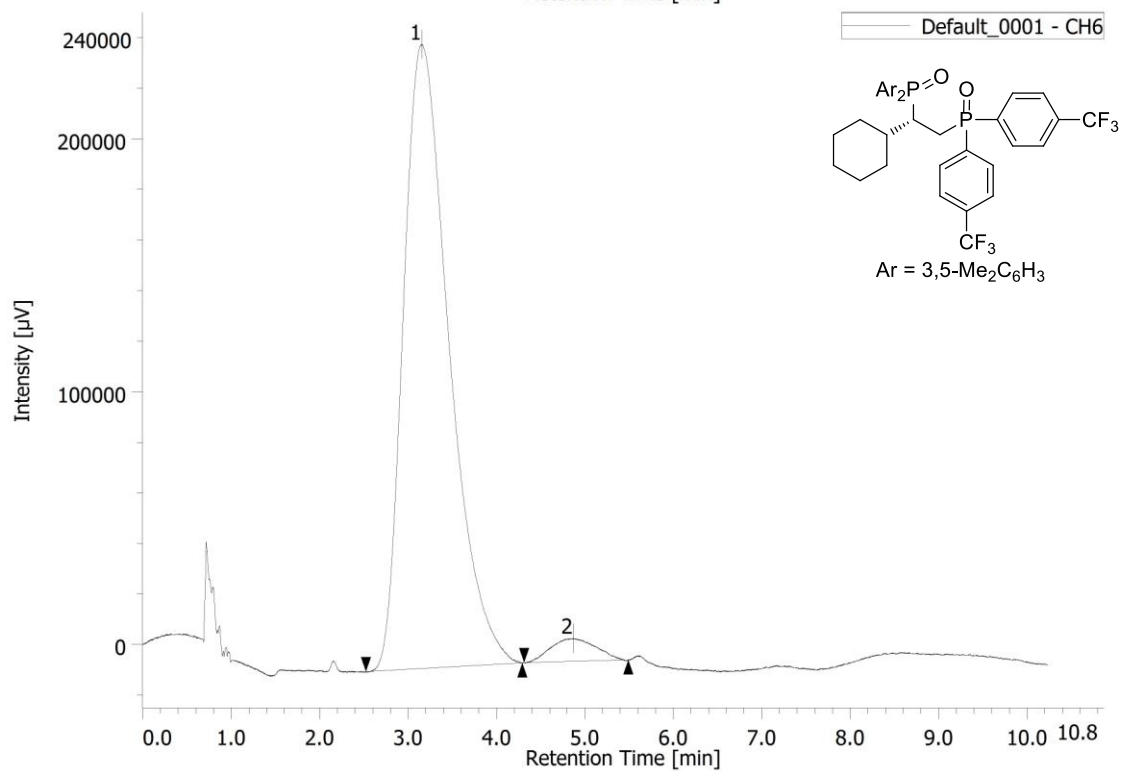

**4be**

| Peak                 | 1    | 2   |
|----------------------|------|-----|
| Retention Time (min) | 3.2  | 4.9 |
| Area (%)             | 96.5 | 3.5 |

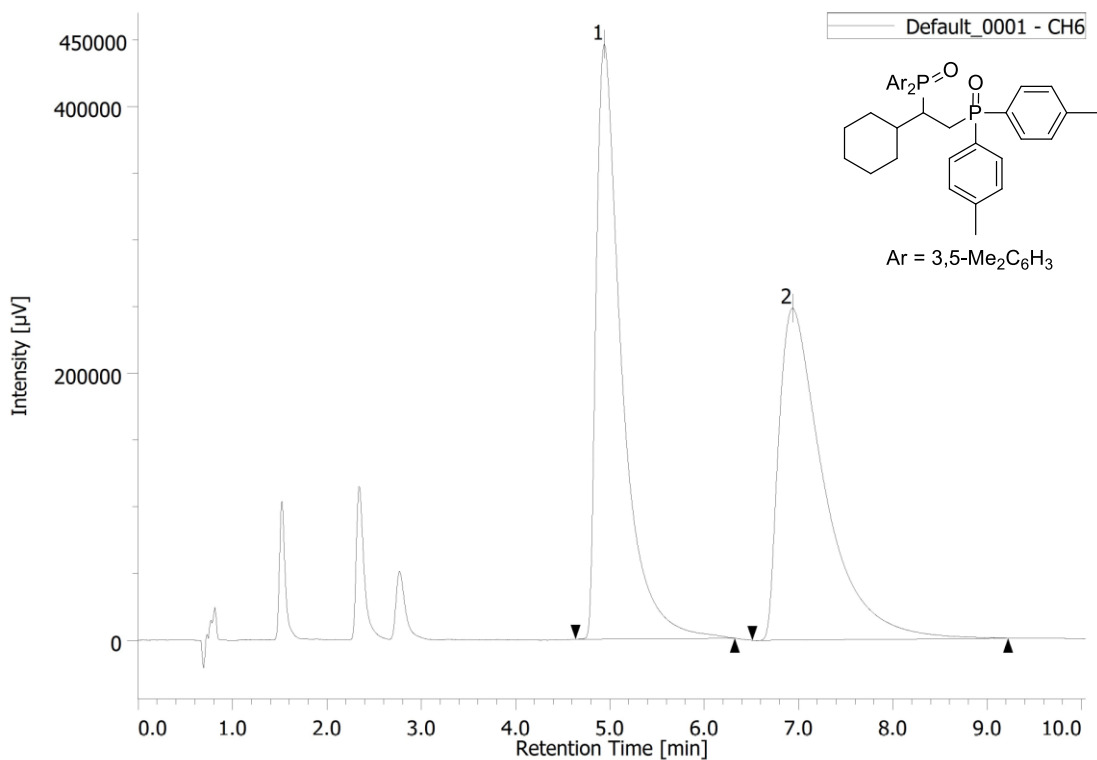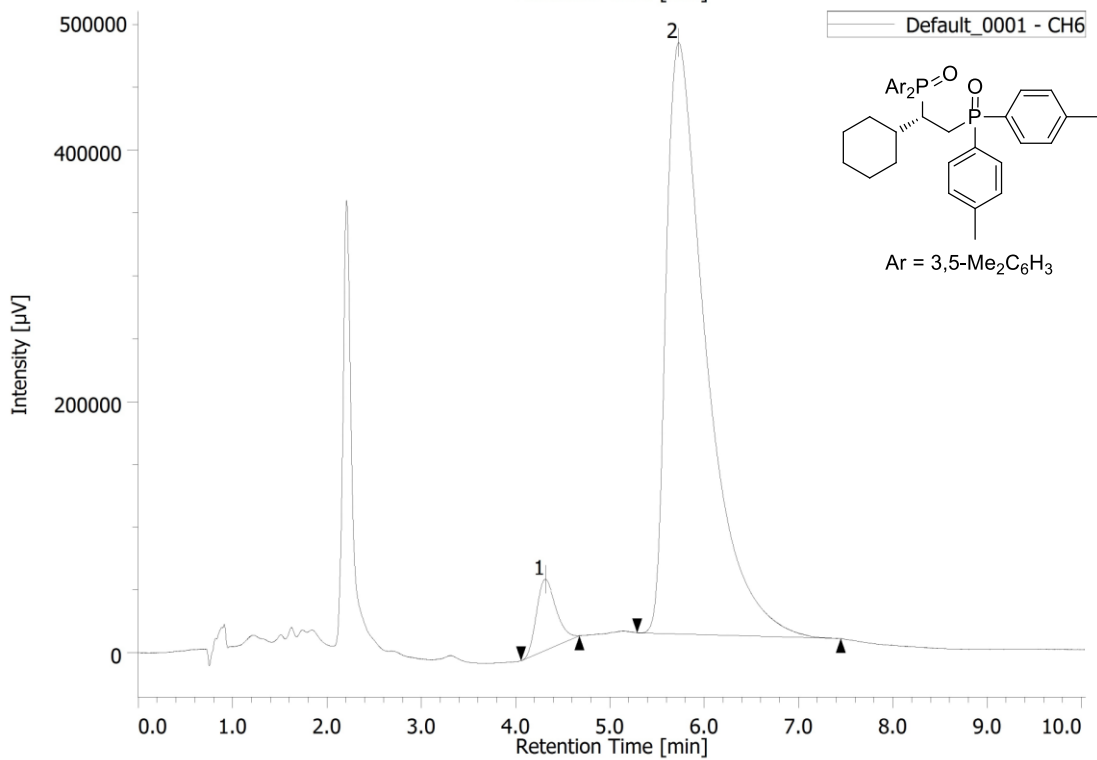

**4ce**

|                      |     |      |
|----------------------|-----|------|
| Peak                 | 1   | 2    |
| Retention Time (min) | 4.3 | 5.7  |
| Area (%)             | 5.6 | 94.4 |

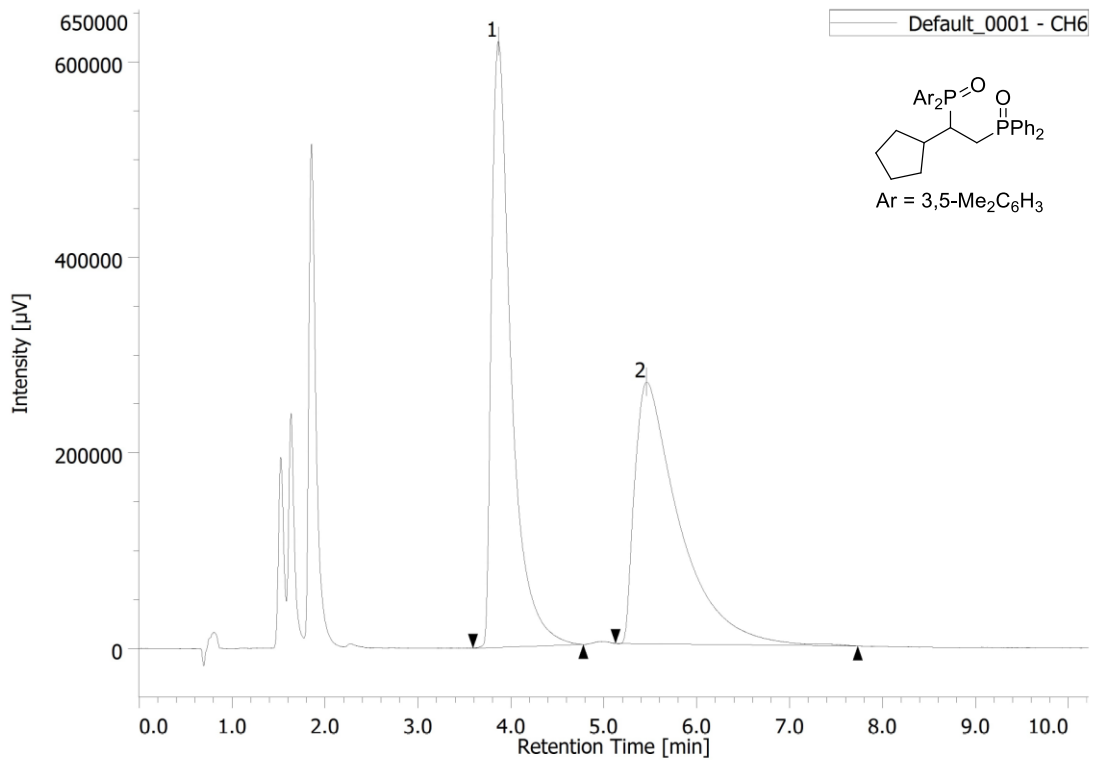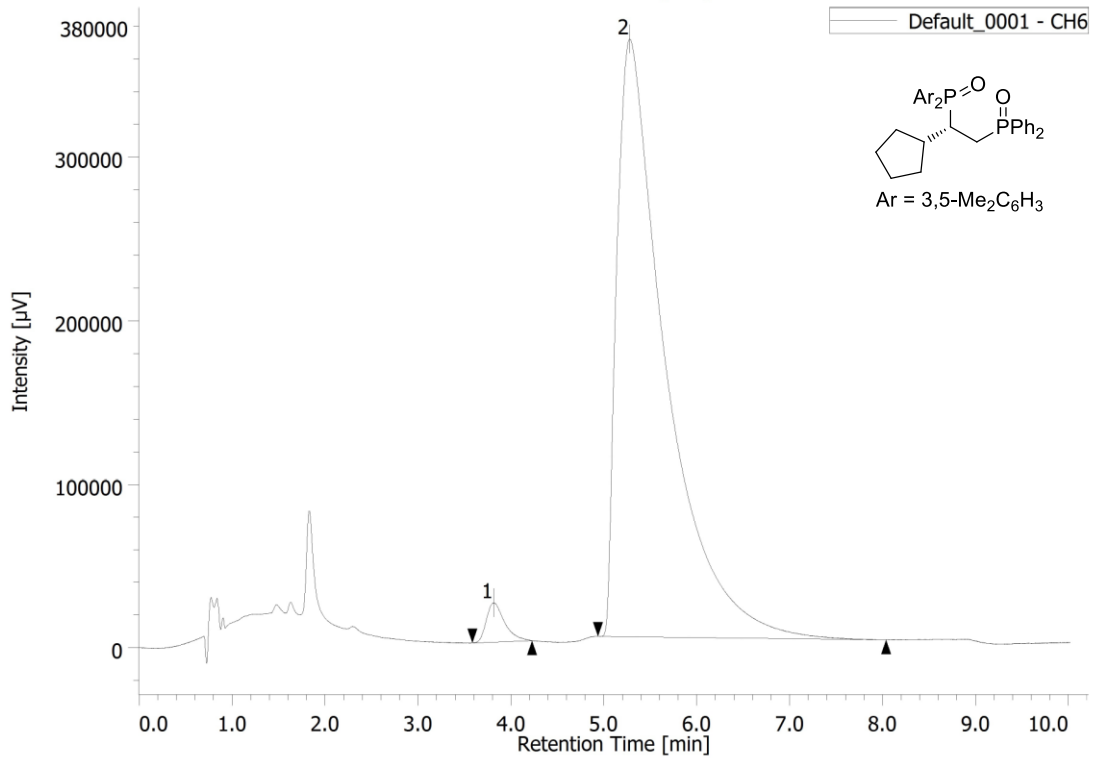

4ee

| Peak                 | 1   | 2    |
|----------------------|-----|------|
| Retention Time (min) | 3.8 | 5.3  |
| Area (%)             | 2.4 | 97.6 |

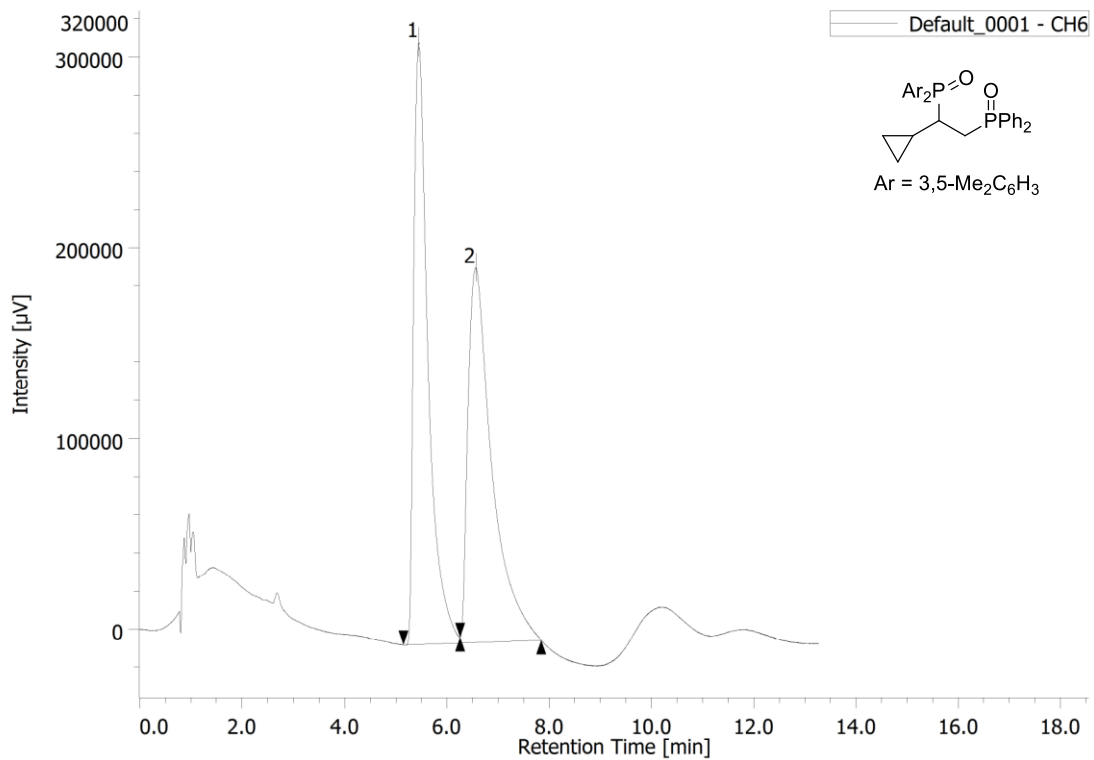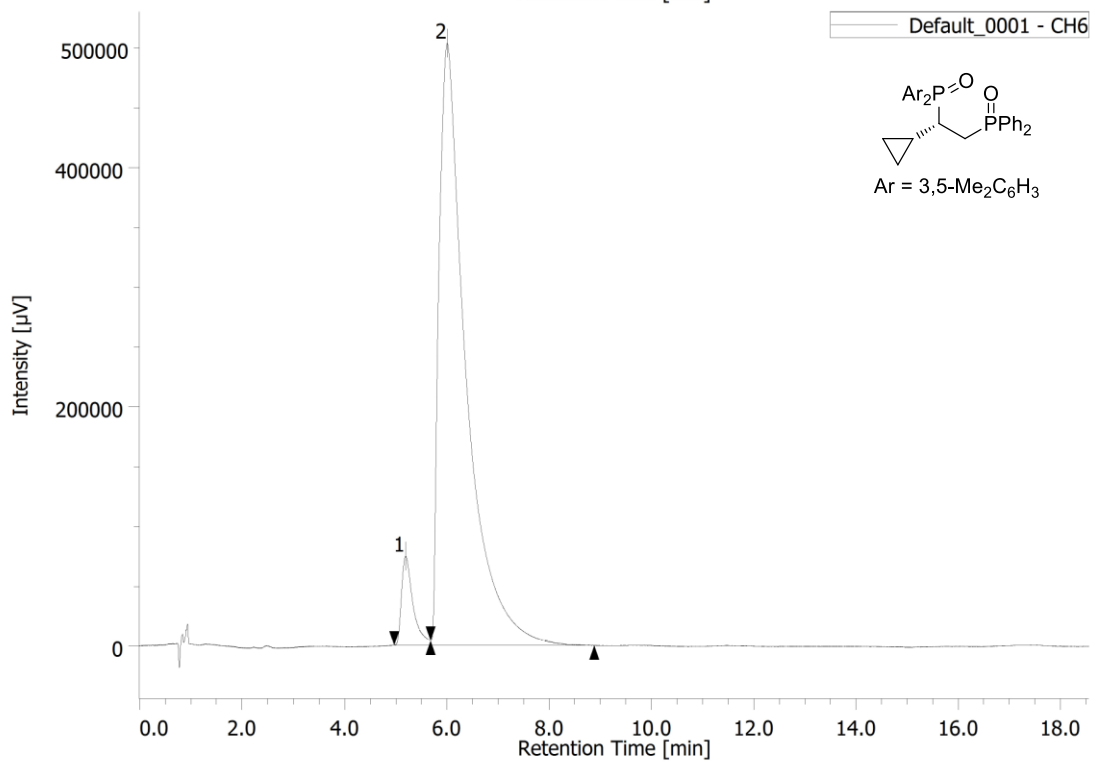

**4fe**

| Peak                 | 1   | 2    |
|----------------------|-----|------|
| Retention Time (min) | 5.2 | 6.0  |
| Area (%)             | 6.0 | 94.0 |

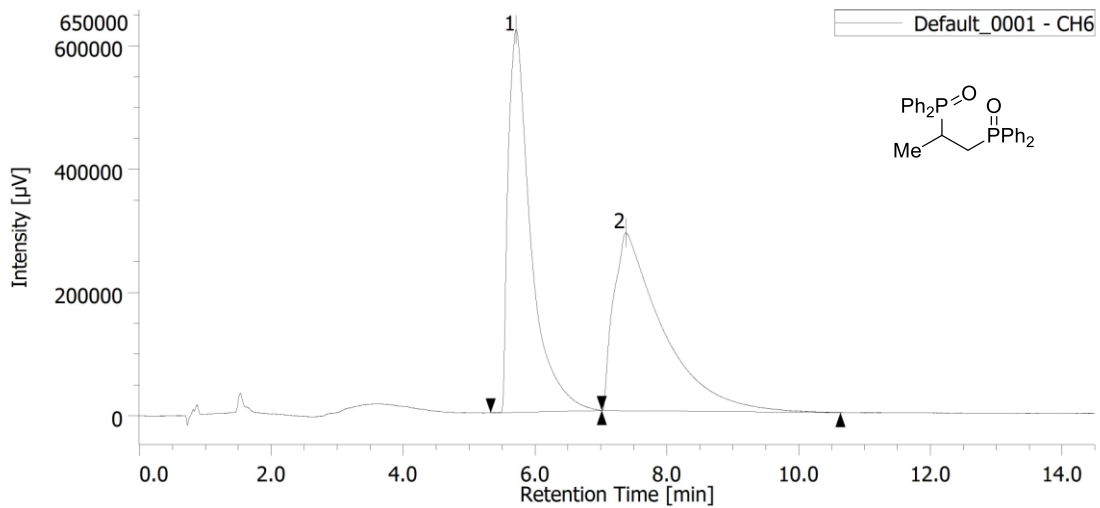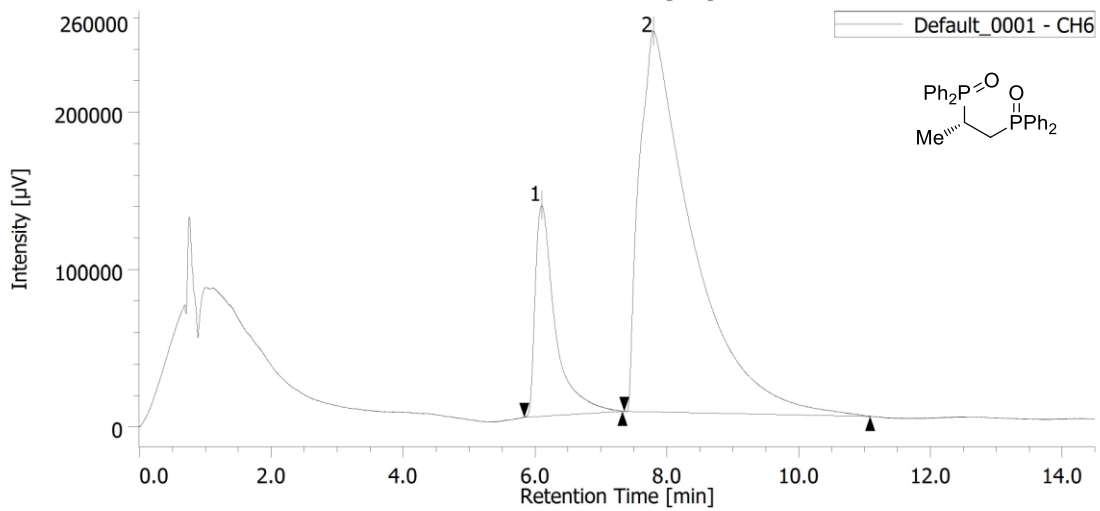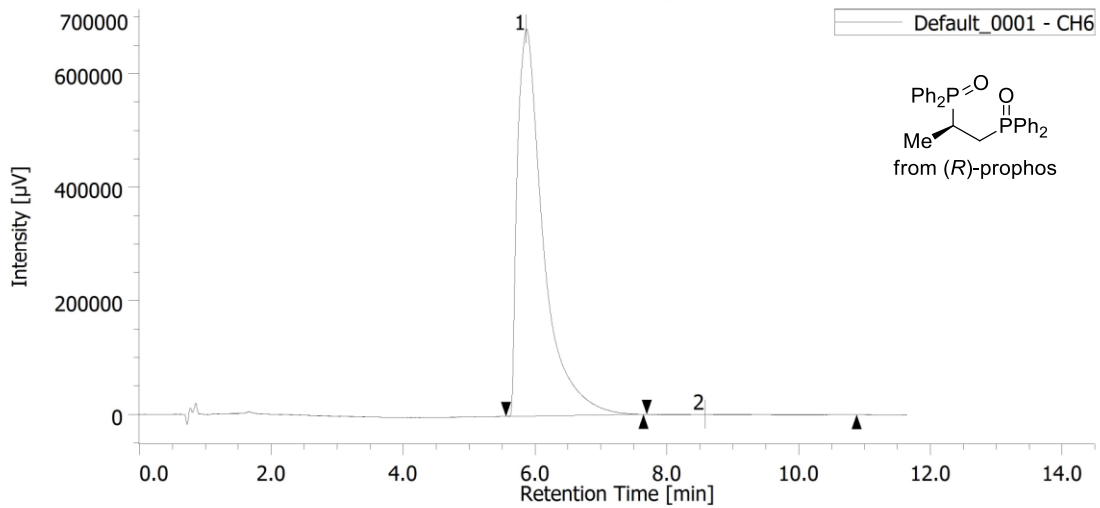

**4ga**

| Peak                 | 1    | 2    |
|----------------------|------|------|
| Retention Time (min) | 6.1  | 7.8  |
| Area (%)             | 17.4 | 82.6 |



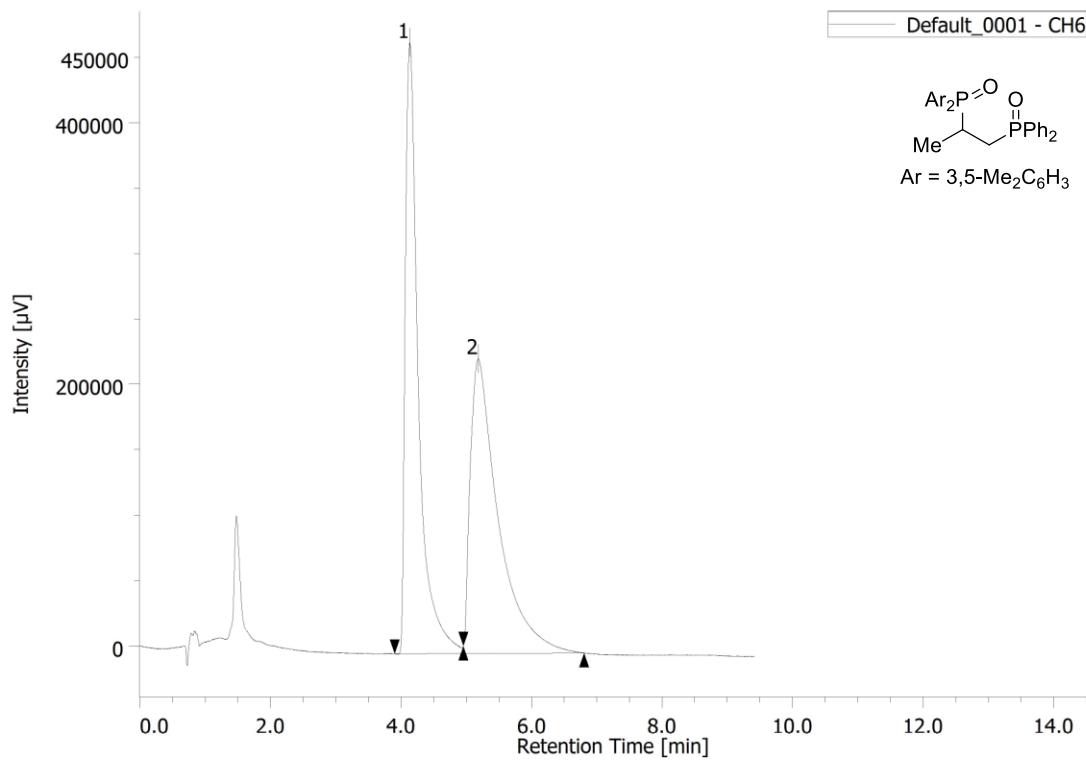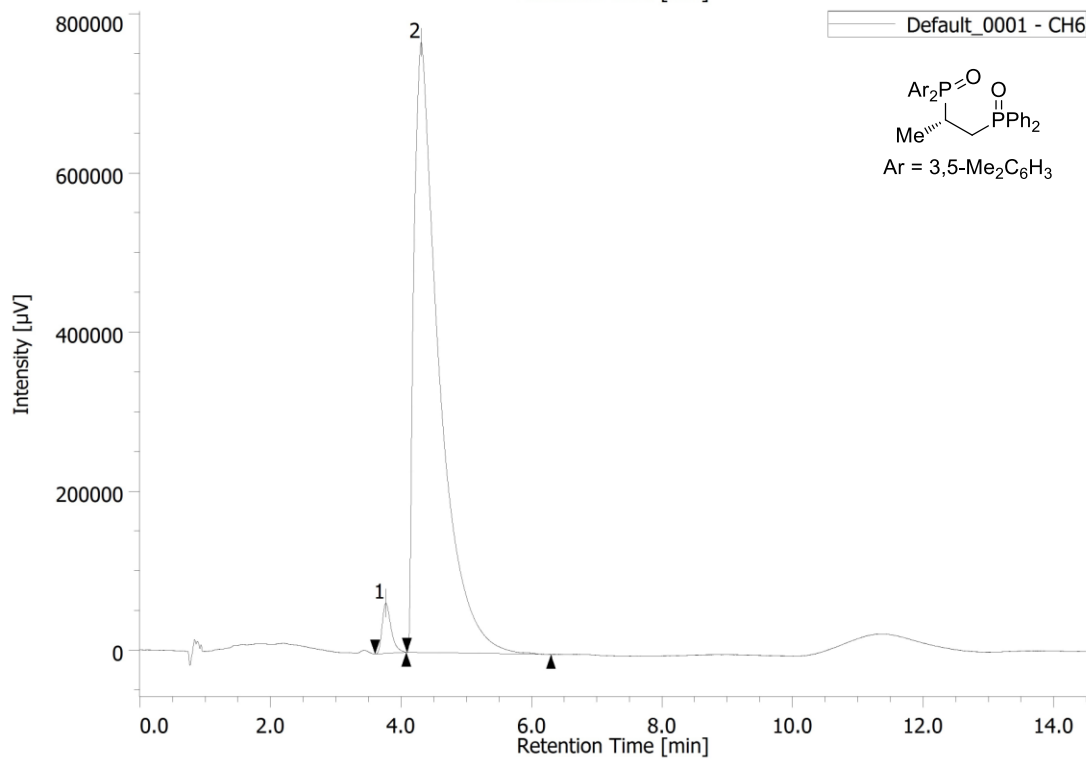

**4ge**

|                      |     |      |
|----------------------|-----|------|
| Peak                 | 1   | 2    |
| Retention Time (min) | 3.8 | 4.3  |
| Area (%)             | 2.8 | 97.2 |

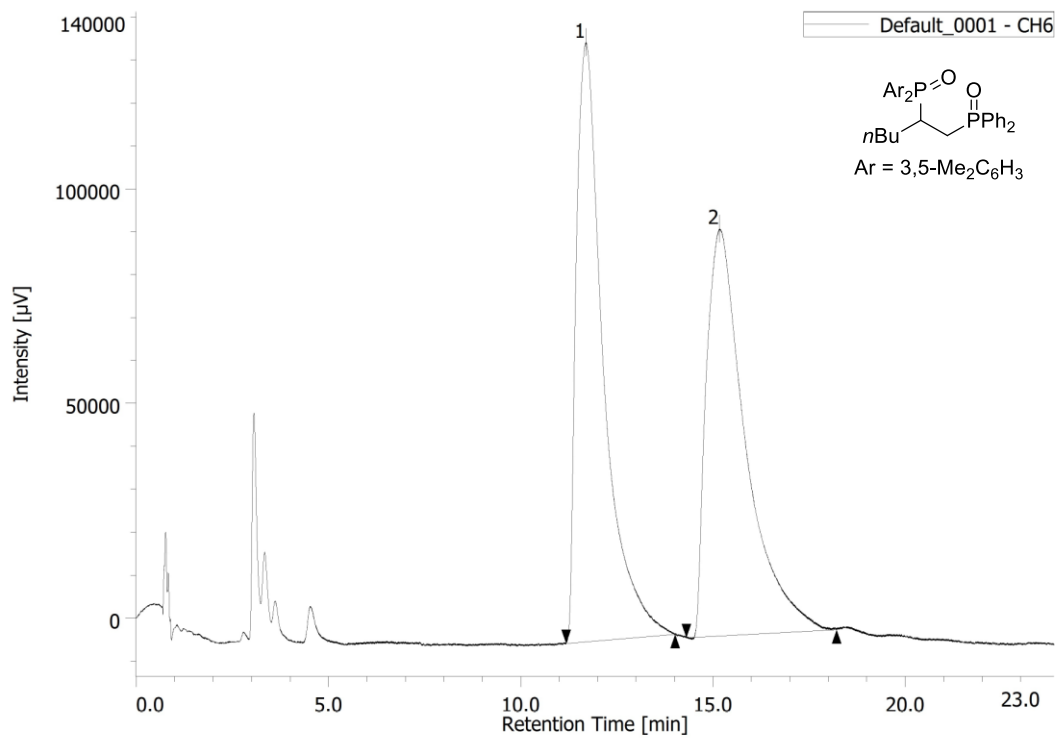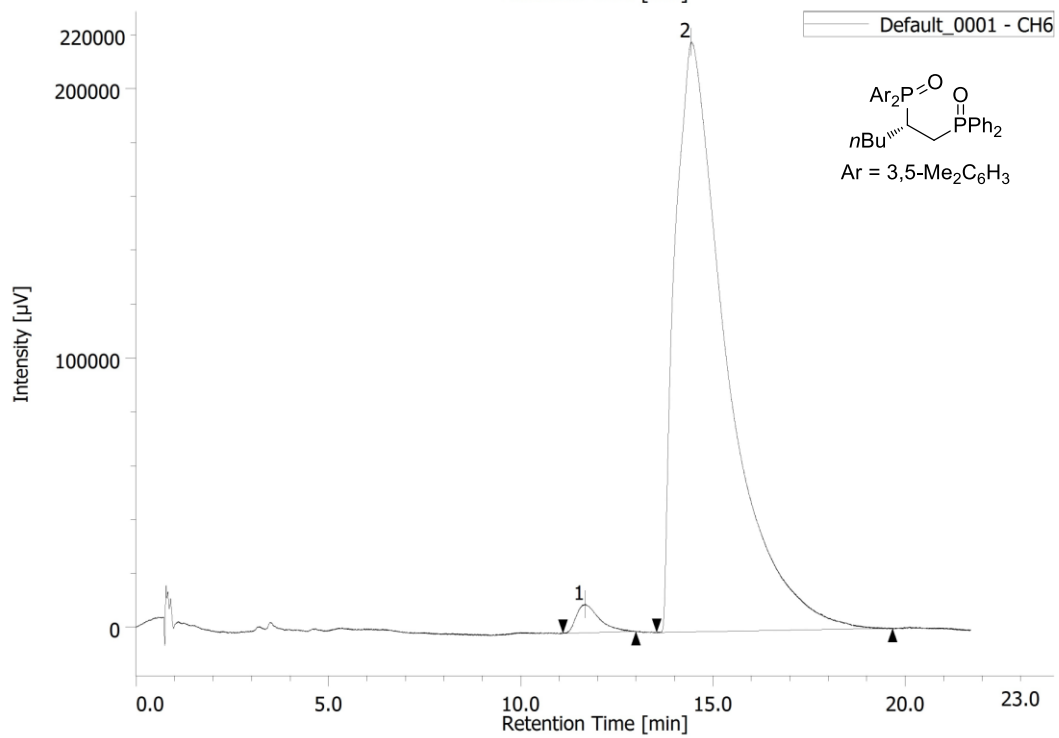

#### 4he

|                      |      |      |
|----------------------|------|------|
| Peak                 | 1    | 2    |
| Retention Time (min) | 11.7 | 14.4 |
| Area (%)             | 2.1  | 97.9 |

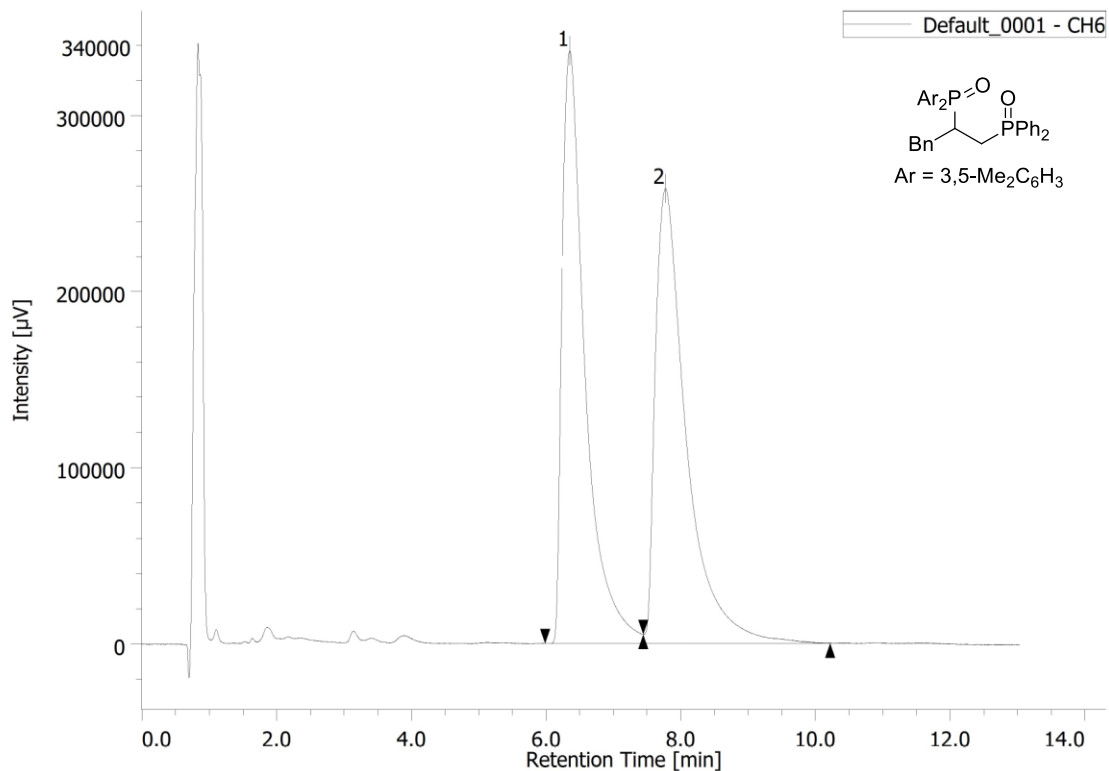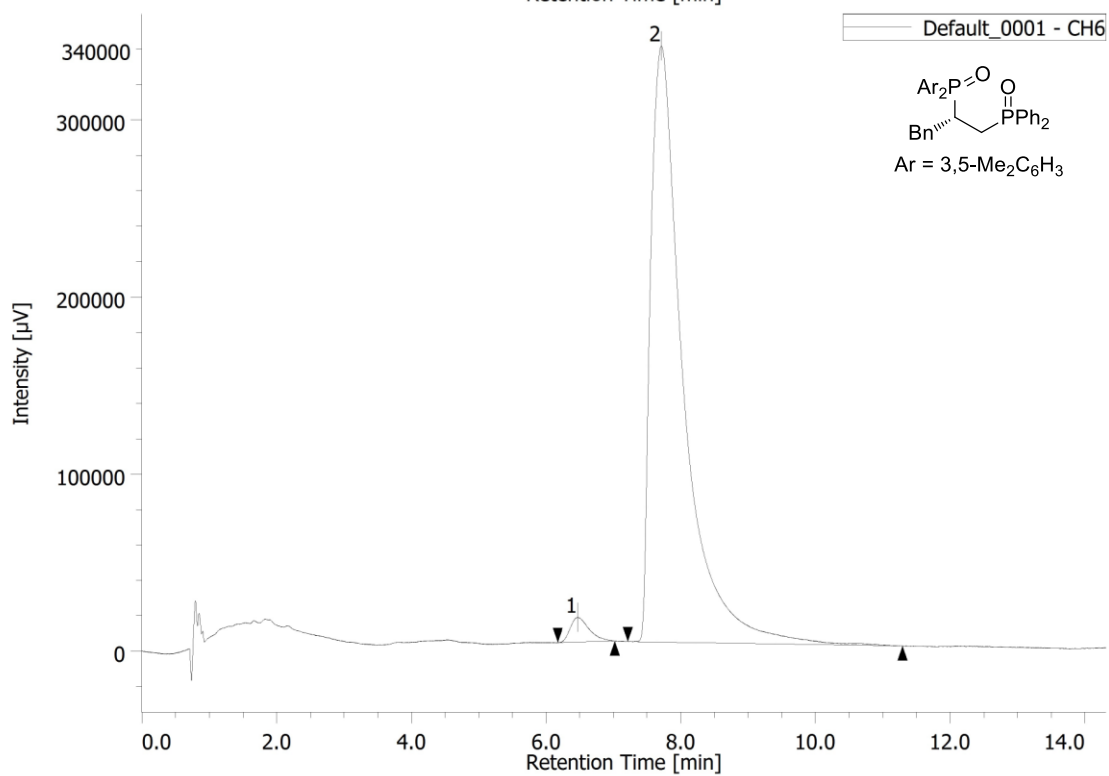

4ie

| Peak                 | 1   | 2    |
|----------------------|-----|------|
| Retention Time (min) | 6.5 | 7.7  |
| Area (%)             | 2.3 | 97.7 |

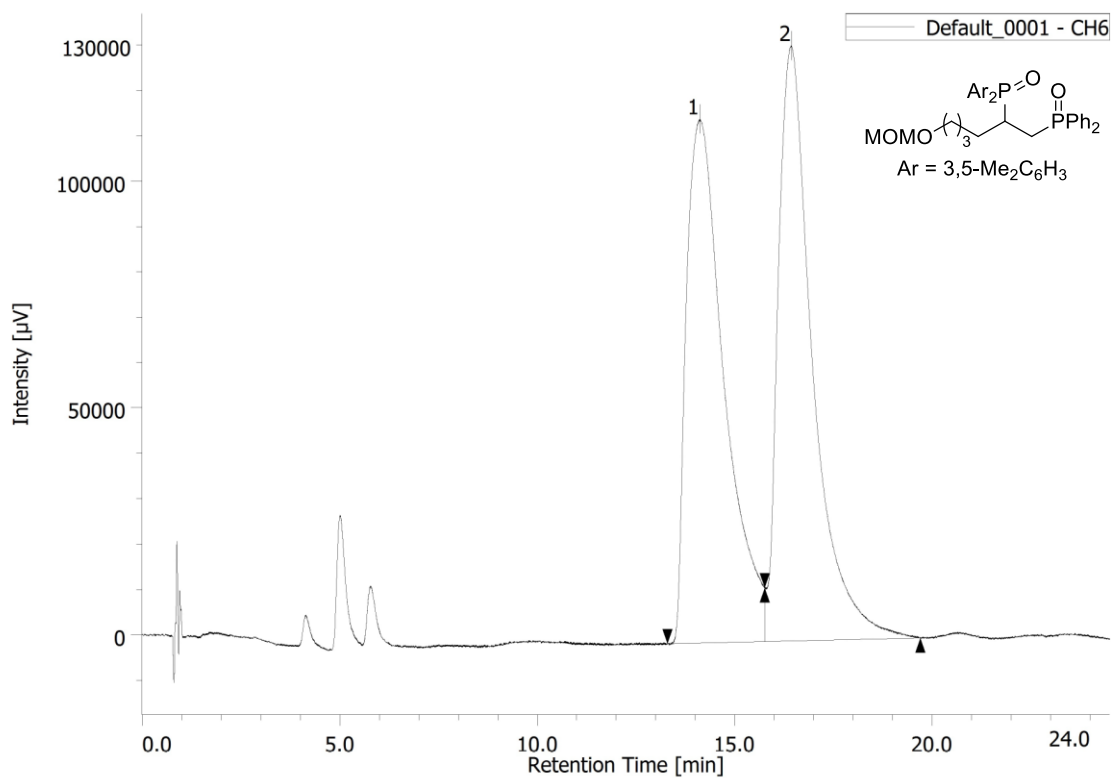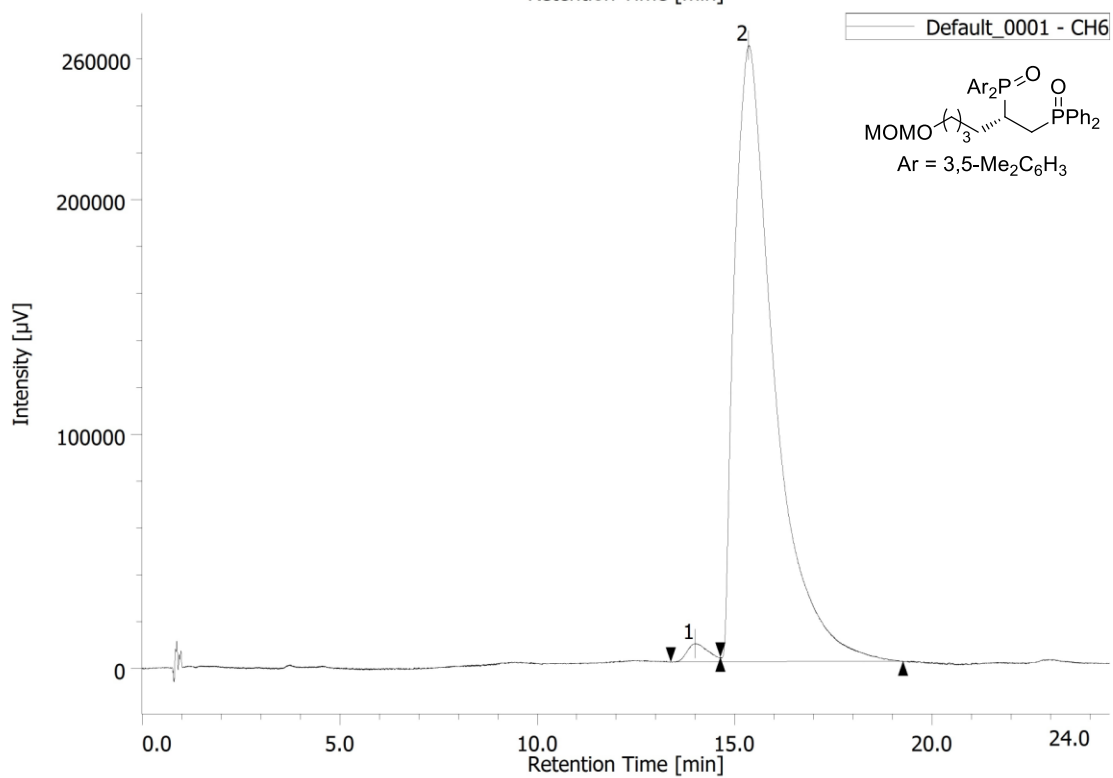

4je

| Peak                 | 1    | 2    |
|----------------------|------|------|
| Retention Time (min) | 14.0 | 15.4 |
| Area (%)             | 1.6  | 98.4 |

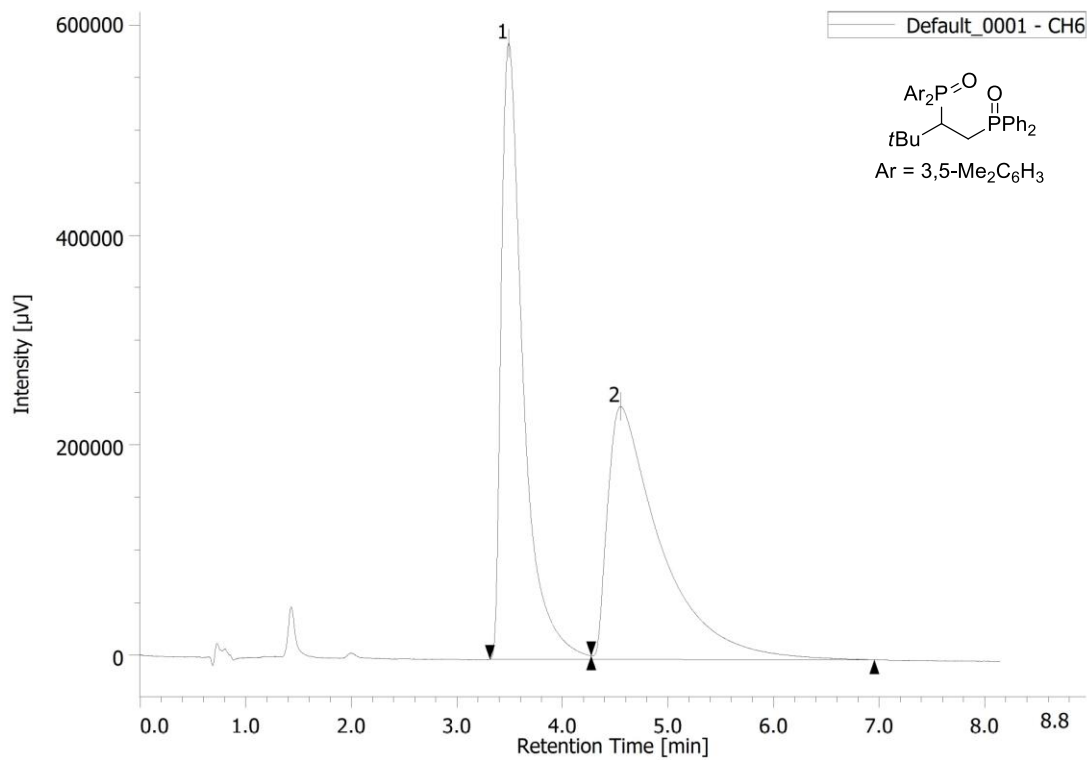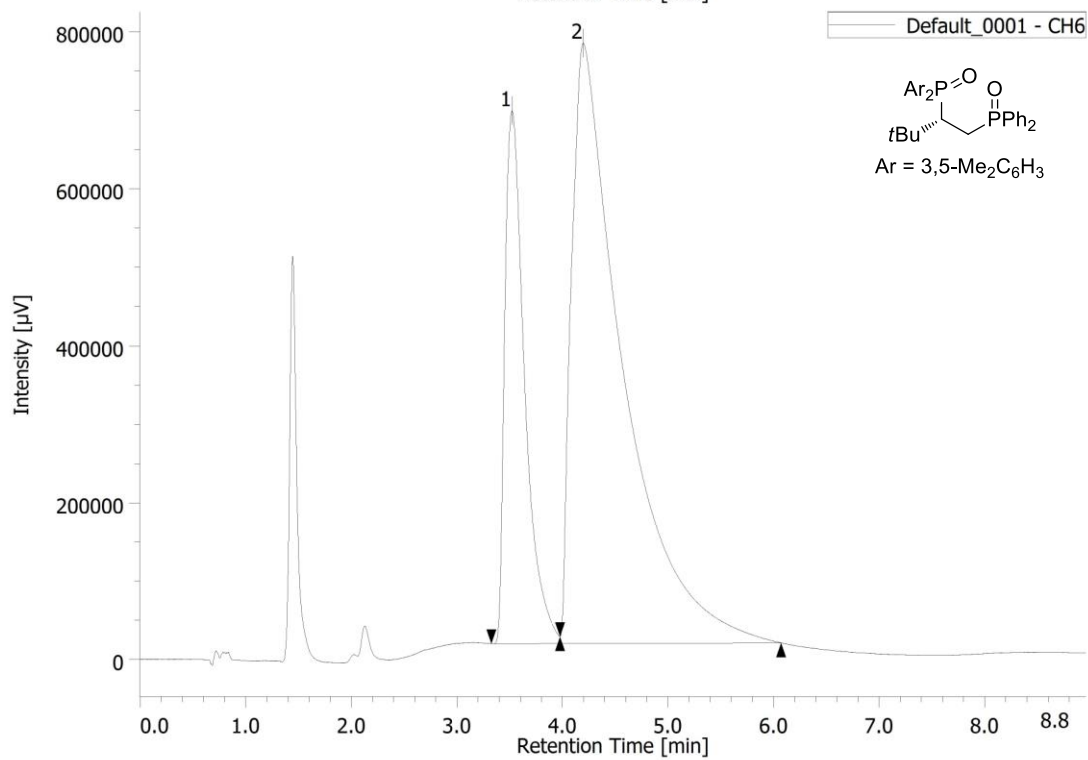

4ke

| Peak                 | 1    | 2    |
|----------------------|------|------|
| Retention Time (min) | 3.5  | 4.2  |
| Area (%)             | 25.6 | 74.4 |

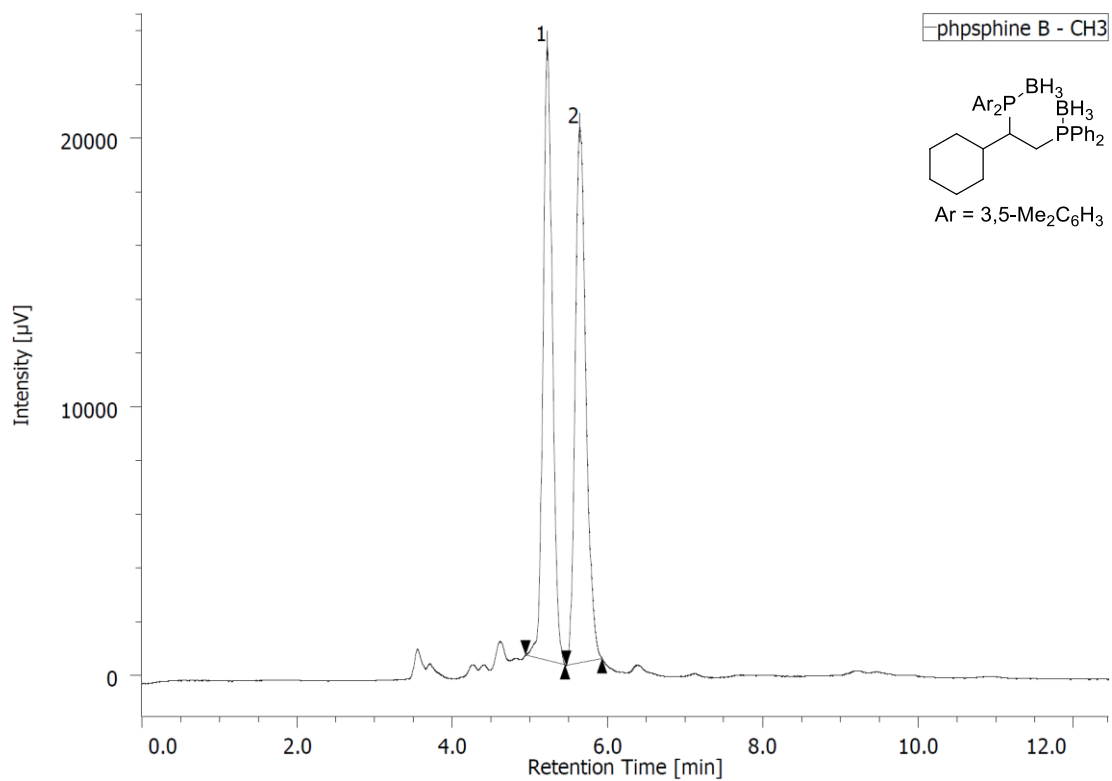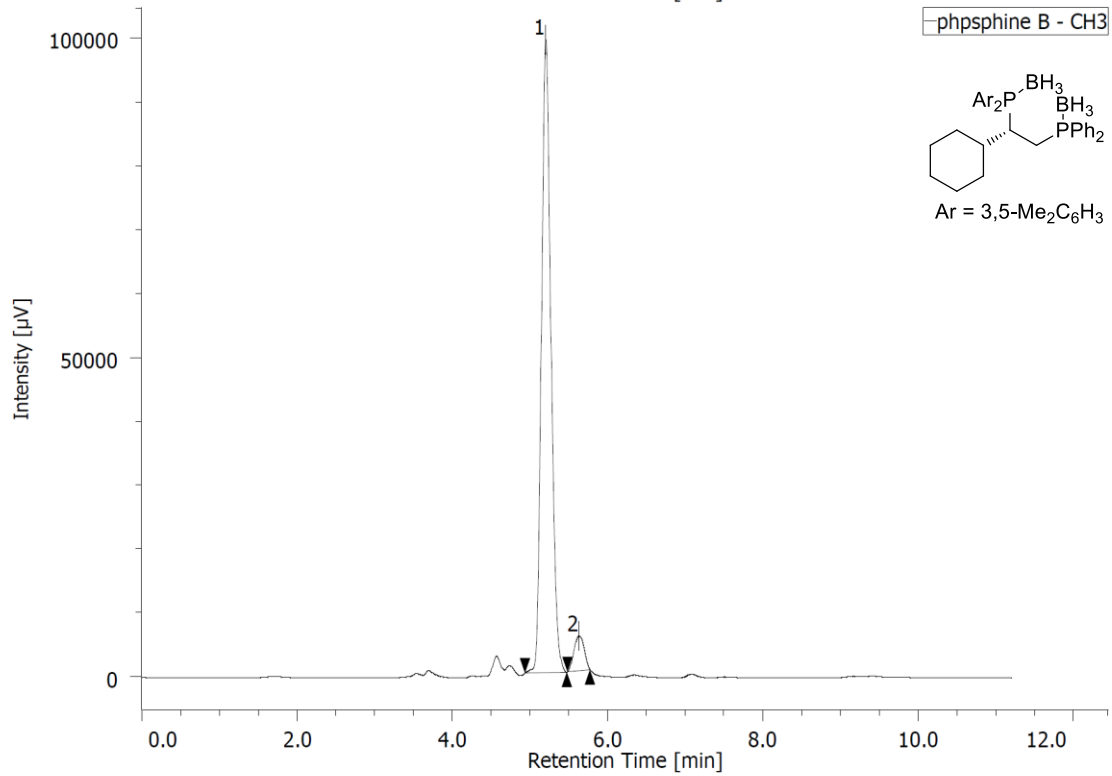

**6ae**

| Peak                 | 1    | 2   |
|----------------------|------|-----|
| Retention Time (min) | 5.2  | 5.6 |
| Area (%)             | 94.4 | 5.6 |
